# Supplementary material for: Highly luminescent antiaromatic diborinines with fused thiophene rings
Source: Royal Society of Chemistry journal article supplement (doi:10.1039/d3dt01841e), 2023-01-01
Supplement: d3dt01841e1.pdf [file d3dt01841e1.pdf]

## Supporting Information

### Highly luminescent antiaromatic diborinines with fused thiophene rings

Yohei Adachi,<sup>1,\*</sup> Takumi Hasegawa,<sup>1</sup> and Joji Ohshita<sup>1,2,\*</sup>

*<sup>a</sup>Smart Innovation Program, Graduate School of Advanced Science and Engineering, Hiroshima University, Higashi-Hiroshima 739-8527, Japan*

*<sup>b</sup>Division of Materials Model-Based Research, Digital Monozukuri (Manufacturing) Education and Research Center, Hiroshima University, Higashi-Hiroshima 739-0046, Japan*

## Experimental

### *Materials*

All reactions were carried out under dry argon. For the reaction solvents, diethyl ether, THF, dichloromethane, and toluene were purchased from Kanto Chemical Co., Ltd. and were distilled from calcium hydride and stored over activated molecular sieves under argon until use. All other chemicals were purchased from FUJIFILM Wako Pure Chemical Industries, Ltd. and TCI Co., Ltd. Starting material triply(dimethoxy)borane and mesityl(dimethoxy)borane were prepared according to the literature procedure.<sup>S1</sup>

### *Analytical methods*

NMR spectra were recorded on Varian System 500 and 400MR spectrometers. Abbreviations Th, Mes, and Tip used for the following NMR assignments stand for thiophene ring, mesityl, and triptyl groups, respectively. High-resolution mass spectra were obtained by the direct infusion method on a Thermo Fisher Scientific LTQ Orbitrap XL spectrometer at N-BARD, Hiroshima University. UV-vis absorption spectra were measured with a Shimadzu UV-3600 Plus spectrometer. Photoluminescence (PL) spectra were measured with a HORIBA FluoroMax-4 spectrophotometer. The absolute PL quantum yields were determined by using a HORIBA FluoroMax-4 spectrophotometer attached to an integrating sphere. CVs were measured with an AMETEK VersaSTAT 4 potentiostat/galvanostat in a solution of 0.1 M tetrabutylammonium hexafluorophosphate (TBAPF<sub>6</sub>) in dichloromethane using a three-electrode system with a Pt plate counter electrode, a Pt wire working electrode, and an Ag/Ag<sup>+</sup> reference electrode.

### *Computational details*

All the computational calculations were performed on the Gaussian 16 program. For the geometrical optimizations, vibrational frequency calculations, and TD-DFT calculations, the B3LYP/6-31G(d) level was used for **1<sup>Br</sup>** and **3<sup>Br</sup>**, and the B3LYP-D3(BJ)/6-31G(d) level for other compounds. NICS

calculations were carried out at the B3LYP/6-31G(d,p) level toward the optimized geometries. Fluoride ion affinity (FIA) and global electrophilicity index (GEI) calculations were performed at M06-2X(D3zero)/def2-QZVPP//B3LYP-D3(BJ)/6-31G(d) level. FIA value was calculated by using the experimental FIA value of  $\text{Me}_3\text{Si}^+$  (952.5 kJ/mol) as a reference.

#### *XRD measurements*

Single crystal X-ray diffraction data was collected at 100 K on a Rigaku XtaLAB Synergy R,DW diffractometer at Natural Science Center for Basic Research and Development (N-BARD), Hiroshima University. The structure was solved by Intrinsic Phasing on the SHELXL 2018/2 program and expanded using Fourier techniques. Non-hydrogen atoms were refined anisotropically, whereas hydrogen atoms were included but not refined (SHELXL 2018/3). Graphical crystal structures were generated using Mercury 4.3.1 (Cambridge Crystallographic Data Centre).

#### *Titration experiments and ammonia vapor detection*

Titration experiments with TBAF and DMAP were performed in 0.08 mM THF or toluene solutions for absorption and fluorescence measurements. In all the measurements, the samples were left for 1 minutes to equilibrate after each addition of the Lewis bases. The association constants were calculated by using HypSpec Graphs software.<sup>S2</sup> A filter paper was soaked in a dichloromethane solution of **A-3<sup>Me</sup>** or **B-3<sup>Tip</sup>** at a concentration of 0.02 mM and dried under air for 1 hour. The test paper was held over a petri dish containing conc. ammonia water and the change in fluorescence was monitored.

### Route A

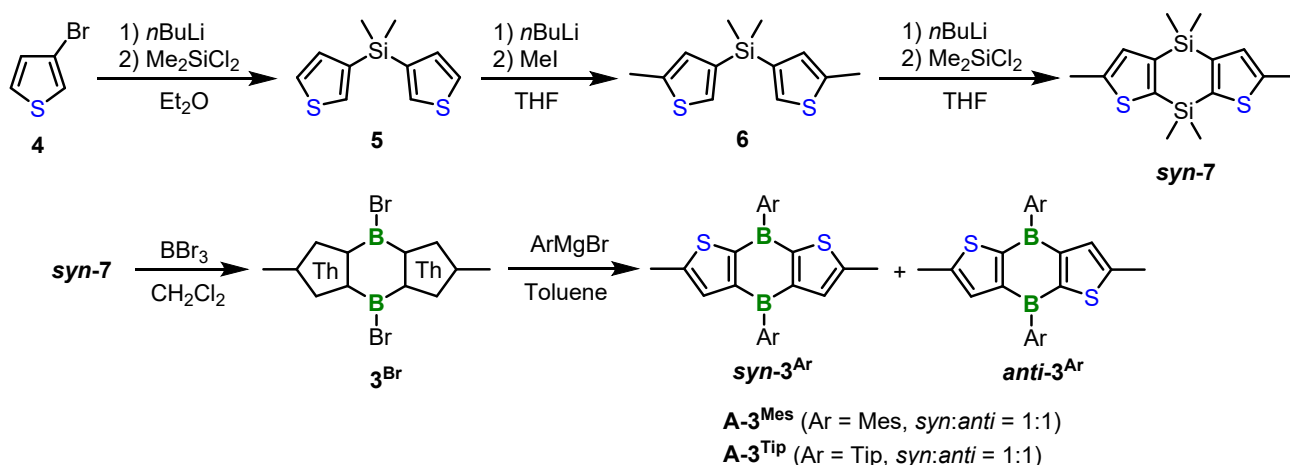

### Synthesis of 5

To a solution of 29.9 g (183 mmol) of **4** in 100 mL of diethyl ether was added dropwise 68.0 mL (184 mmol) of 2.70 M *n*-BuLi in hexane for 30 min at  $-80\text{ }^\circ\text{C}$ , and the mixture was stirred for 1 h at the temperature. To this was slowly added 11.8 g (91.4 mmol) of dimethyldichlorosilane at  $-80\text{ }^\circ\text{C}$ , and the mixture was stirred at room temperature overnight. The resulting mixture was hydrolyzed with water, and extracted with hexane. The organic layer was washed with water then with brine. After drying over anhydrous magnesium sulfate, the solvent was evaporated. The residue was purified by silica gel chromatography with *n*-hexane as the eluent to afford compound **5** in 98% yield (20.1 g, 89.7 mmol) as a colorless oil.  $^1\text{H NMR}$  (500 MHz,  $\text{CDCl}_3$ )  $\delta$  = 7.47 (dd,  $J$  = 2.6, 0.6 Hz, 2H, Th), 7.41 (dd,  $J$  = 4.8, 2.6 Hz, 2H, Th), 7.20 (dd,  $J$  = 4.8, 0.6 Hz, 2H, Th), 0.55 (s, 6H,  $\text{SiMe}_2$ ).  $^{13}\text{C}\{^1\text{H}\}$  NMR (126 MHz,  $\text{CDCl}_3$ )  $\delta$  = 138.8, 132.6, 131.6, 125.8, -1.1. EI-MS Calcd for  $\text{C}_{10}\text{H}_{12}\text{S}_2\text{Si}$ :  $M^+$  : 224.01497, Found : 224.01505.

### Synthesis of 6

To a solution of 8.00 g (35.7 mmol) of **5** in 80 mL of THF was added dropwise 28.0 mL (75.6 mmol) of 2.64 M *n*-BuLi in hexane for 15 min at  $0\text{ }^\circ\text{C}$ , and the mixture was stirred for 1 h at the temperature. To this was slowly added 5.60 mL (90.0 mmol) of iodomethane at  $-80\text{ }^\circ\text{C}$ , and the mixture was stirred

at room temperature overnight. The resulting mixture was hydrolyzed with water, and extracted with hexane. The organic layer was washed with water then with brine. After drying over anhydrous magnesium sulfate, the solvent was evaporated. The residue was purified by silica gel chromatography with *n*-hexane as the eluent to afford compound **6** in 81% yield (7.31 g, 28.9 mmol) as a colorless oil.  $^1\text{H}$  NMR (500 MHz,  $\text{CDCl}_3$ )  $\delta$  = 7.20 (d,  $J$  = 1.3 Hz, 2H, Th), 6.81–6.80 (m, 2H, Th), 2.50 (d,  $J$  = 1.1 Hz, 6H, Th-Me), 0.47 (s, 6H,  $\text{SiMe}_2$ ).  $^{13}\text{C}\{^1\text{H}\}$  NMR (126 MHz,  $\text{CDCl}_3$ )  $\delta$  = 140.2, 139.6, 130.8, 129.9, 14.7, -1.4. EI-MS Calcd for  $\text{C}_{12}\text{H}_{16}\text{S}_2\text{Si}$ :  $M^+$  : 252.04627, Found : 252.04696.

#### *Synthesis of **syn-7***

To a solution of 3.94 g (15.6 mmol) of **6** in 35 mL of THF was added dropwise 12.0 mL (31.7 mmol) of 2.64 M *n*-BuLi in hexane for 15 min at 0 °C, and the mixture was stirred for 1 h at the temperature. To this was slowly added 2.00 mL (16.7 mmol) of dimethyldichlorosilane at -80 °C, and the mixture was stirred at room temperature overnight. The resulting mixture was hydrolyzed with water, and extracted with hexane. The organic layer was washed with water then with brine. After drying over anhydrous magnesium sulfate, the solvent was evaporated. The residue was purified by silica gel chromatography with *n*-hexane as the eluent to afford compound **syn-7** in 42% yield (2.03 g, 6.57 mmol) as a white solid.  $^1\text{H}$  NMR (500 MHz,  $\text{CDCl}_3$ )  $\delta$  = 6.99 (d,  $J$  = 1.0 Hz, 2H, Th), 2.59 (d,  $J$  = 1.0 Hz, 6H, Th-Me), 0.48 (s, 6H,  $\text{SiMe}_2$ ), 0.37 (s, 6H,  $\text{SiMe}_2$ ).  $^{13}\text{C}$  NMR (126 MHz,  $\text{CDCl}_3$ )  $\delta$  = 148.4, 146.3, 143.2, 131.2, 14.7, 2.3, 0.3. FI-MS Calcd for  $\text{C}_{14}\text{H}_{20}\text{S}_2\text{Si}_2$  :  $M^+$ : 308.05449, Found: 308.05537. m.p. 147.7-149.0 °C.

#### *Synthesis of **A-3<sup>Mes</sup>***

To a solution of **syn-7** (200 mg, 0.648 mmol) in 15 mL of toluene was slowly added 1.70 mL (1.70 mmol) of 1.0 mol/L  $\text{BBr}_3$  in toluene for 5 min at 0 °C and stirred for overnight at 50 °C. All volatiles were removed in vacuum to give **3<sup>Br</sup>** quantitatively as a brown solid. The product was used in the next

step without further purification. NMR data of **3<sup>Br</sup>**: <sup>1</sup>H NMR (500 MHz, CDCl<sub>3</sub>) δ = 7.41–7.39 (m, 2H, Th), 2.56 (d, *J* = 0.7 Hz, 6H, Th-Me). <sup>11</sup>B NMR (160 MHz, CDCl<sub>3</sub>) δ = 50.7.

To a solution of **3<sup>Br</sup>** synthesized above in 12 mL of toluene was slowly added dropwise 2.55 mL (2.55 mmol) of 1.0 M 2-mesitylmagnesium bromide in THF at –80 °C, then the mixture was stirred overnight at room temperature. The resulting mixture was hydrolyzed with saturated NH<sub>4</sub>Cl aqueous solution, and the organic layer was washed twice with brine. After drying over anhydrous magnesium sulfate, the solvent was evaporated. The crude product was purified by silica gel chromatography using a mixed solvent (*n*-hexane : dichloromethane = 2 : 1) as the eluent to give 17.8 mg (39.4 μmol, 6% yield) of the title compound as an orangish powder as a *syn*-**3<sup>Mes</sup>**: *anti*-**3<sup>Mes</sup>** = 1:1 mixture. <sup>1</sup>H NMR (400 MHz, CDCl<sub>3</sub>) δ = 6.90–6.86 (m, 12H, aromatic), 2.43–2.40 (m, 12H, Th-Me), 2.36 (s, 3H, *syn*-Mes), 2.35 (s, 6H, *anti*-Mes), 2.34 (s, 3H, *syn*-Mes), 2.24 (s, 6H, *syn*-Mes), 2.20 (s, 12H, *anti*-Mes), 2.15 (s, 6H, *syn*-Mes). <sup>13</sup>C NMR could not be recorded due to lack of sample. <sup>11</sup>B NMR (160 MHz, C<sub>6</sub>D<sub>6</sub>) δ = 56.7. m.p. 202.5–204.0 °C.

#### Synthesis of **A-3<sup>Tip</sup>**

**A-3<sup>Tip</sup>** was prepared from **3<sup>Br</sup>** synthesized from 1.62 mmol of ***syn*-7**, 7.00 mL (4.86 mmol) of 0.69 mol/L triplylmagnesium bromide in THF, and 10 mL of toluene as a yellowish powder as a *syn*-**3<sup>Tip</sup>**: *anti*-**3<sup>Tip</sup>** = 1:1 mixture (156 mg, 0.251 mmol, 16% yield in the two steps) in a manner similar to that of **A-3<sup>Mes</sup>**. <sup>1</sup>H NMR (400 MHz, CDCl<sub>3</sub>) δ = 7.00 (s, 2H, *syn*-Tip), 6.99 (s, 4H, *anti*-Tip), 6.99 (s, 2H, *syn*-Tip), 6.91 (d, *J* = 0.9 Hz, 2H, *anti*-Th), 6.90 (d, *J* = 1.0 Hz, 2H, *syn*-Th), 3.00–2.88 (m, 4H, Tip), 2.75–2.53 (m, 8H, Tip), 2.43 (s, 12H, Th-Me), 1.34–1.29 (m, 24H, Tip), 1.20–1.15 (m, 24H, Tip), 1.14–1.10 (m, 24H, Tip). <sup>13</sup>C NMR (126 MHz, CDCl<sub>3</sub>) δ = 156.8 (*anti*, br, B–C), 156.0 (*syn*, br, B–C), 155.1 (*syn*, br, B–C), 154.4 (*anti*, br, B–C), 151.6 (*anti*), 151.2 (*syn*), 149.8 (*syn*), 149.5 (*anti*), 149.1 (*syn*), 148.5 (*syn*), 148.2 (*anti*), 148.0 (*syn*), 139.1 (*syn*, br, B–C), 138.1 (*anti*, br, B–C), 137.1 (*syn*, br, B–C), 136.0 (*syn*), 135.9 (*anti*), 119.87 (*syn*), 119.82 (*anti*), 119.78 (*syn*), 35.44 (*syn*), 35.40 (*anti*), 35.37 (*syn*), 34.24 (*syn*), 34.23 (*anti*), 34.21 (*syn*), 24.59 (*anti*), 24.47 (*syn*), 24.46 (*syn*), 24.33

(*anti*), 24.13 (*syn*), 24.12 (*anti*), 24.11 (*syn*), 15.37 (*anti*), 15.36 (*syn*).  $^{11}\text{B}$  NMR (160 MHz,  $\text{CDCl}_3$ )  $\delta = 55.5$ . m.p. 229.3-231.9  $^\circ\text{C}$ .

#### Route B

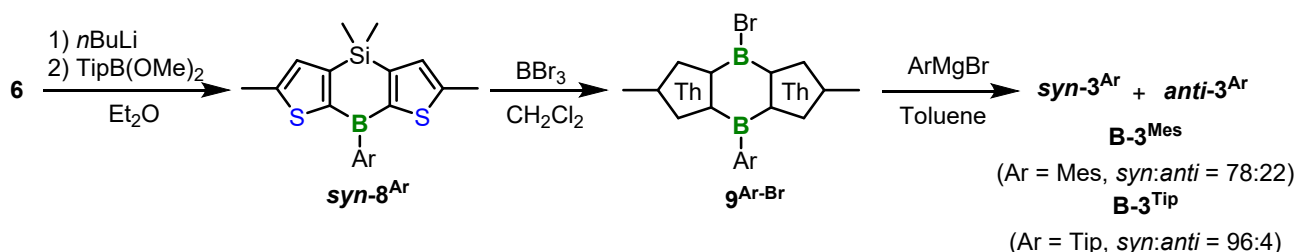

#### Synthesis of $\text{syn-8}^{\text{Mes}}$

$\text{syn-8}^{\text{Mes}}$  was prepared from 2.06 g (8.16 mmol) of **6** and 11.0 mL (17.5 mmol) of 1.59 mol/L *n*-butyllithium in *n*-hexane, 1.65 g (8.59 mmol) of mesityl(dimethoxy)borane, and 20 mL of THF as a white powder (1.69 g, 4.44 mmol, 54% yield) in a manner similar to that of **syn-7**.  $^1\text{H}$  NMR (500 MHz,  $\text{CDCl}_3$ )  $\delta = 7.18$  (d,  $J = 0.9$  Hz, 2H, Th), 6.86 (s, 2H, Mes), 2.57 (d,  $J = 0.9$  Hz, 6H, Th-Me), 2.34 (s, 3H, Mes), 2.13 (s, 6H, Mes), 0.43 (s, 6H,  $\text{SiMe}_2$ ).  $^{13}\text{C}$  NMR (126 MHz,  $\text{CDCl}_3$ )  $\delta = 154.6$ , 152.7, 150.9 (br, B-C), 140.5 (br, B-C), 138.2, 137.0, 132.8, 126.8, 22.7, 21.4, 15.4, -1.1.  $^{11}\text{B}$  NMR (160 MHz,  $\text{CDCl}_3$ )  $\delta = 51.7$ . EI-MS Calcd for  $\text{C}_{21}\text{H}_{25}\text{BS}_2\text{Si}$ :  $M^+$  : 380.12642, Found : 380.12593. m.p. 171.8-172.3  $^\circ\text{C}$ .

#### Synthesis of $\text{syn-8}^{\text{Tip}}$

$\text{syn-8}^{\text{Tip}}$  was prepared from 1.30 g (5.15 mmol) of **6** and 3.90 mL (10.5 mmol) of 2.70 mol/L *n*-butyllithium in *n*-hexane, 1.95 g (7.06 mmol) of tripropyl(dimethoxy)borane, and 10 mL of THF as a white powder (1.58 g, 3.63 mmol, 70% yield) in a manner similar to that above.

$^1\text{H}$  NMR (400 MHz,  $\text{CDCl}_3$ )  $\delta = 7.16$  (d,  $J = 0.9$  Hz, 2H, Th), 6.98 (s, 2H, Tip), 2.99–2.88 (m, 1H, Tip), 2.57 (d,  $J = 0.8$  Hz, 6H, Th-Me), 2.62–2.49 (m, 2H, Tip), 1.31 (d,  $J = 6.9$  Hz, 6H, Tip), 1.11 (d,  $J = 6.7$  Hz, 12H, Tip), 0.44 (s, 6H,  $\text{SiMe}_2$ ).  $^{13}\text{C}$  NMR (126 MHz,  $\text{CDCl}_3$ )  $\delta = 153.6$ , 152.6 (br, B-C), 152.2, 149.8, 148.3, 138.3 (br, B-C), 132.4, 119.8, 35.1, 34.2, 24.6, 24.1, 15.4, -0.9.  $^{11}\text{B}$  NMR (160

MHz, CDCl<sub>3</sub>)  $\delta$  = 52.4. APCI-MS Calcd for C<sub>27</sub>H<sub>37</sub>BS<sub>2</sub>Si : M<sup>+</sup>: 464.21987, Found: 464.22076. m.p. 128.8-128.9 °C.

#### Synthesis of **B-3<sup>Mes</sup>**

**9<sup>Mes-Br</sup>** was prepared from 98.5 mg (0.259 mmol) of **syn-8<sup>Mes</sup>** and 0.300 mL (0.300 mmol) of 1.0 mol/L BBr<sub>3</sub> in dichloromethane, and 7 mL of dichloromethane as a brown solid in a manner similar to that of **3<sup>Br</sup>**. The product was used in the next step without further purification. NMR data of **9<sup>Mes-Br</sup>**: <sup>1</sup>H NMR data of **9<sup>Mes-Br</sup>** could not be obtained as the crude product contained many impurities. <sup>11</sup>B NMR (160 MHz, CDCl<sub>3</sub>)  $\delta$  = 53.2.

**B-3<sup>Mes</sup>** was prepared from **9<sup>Mes-Br</sup>** synthesized above, 0.200 mL (0.200 mmol) of 1.0 mol/L 2-mesitylmagnesium bromide in THF, and 7 mL of toluene as an orangish powder as a **syn-3<sup>Mes</sup>: anti-3<sup>Mes</sup>** = 78:22 (1:0.28) mixture (25.9 mg, 57.3  $\mu$ mol, 22% yield in the two steps) in a manner similar to that of **A-3<sup>Mes</sup>**. <sup>1</sup>H NMR (400 MHz, C<sub>6</sub>D<sub>6</sub>)  $\delta$  = 6.98–6.95 (m, 2.6H, Th), 6.91 (br s, 2H, *syn*-Mes), 6.89 (br s, 1.1H, *anti*-Mes), 6.86 (br s, 2H, *syn*-Mes), 2.42 (s, 6H, *syn*-Mes), 2.36 (s, 3.4H, *anti*-Mes), 2.31 (s, 3H, *syn*-Mes), 2.28 (s, 6H, *syn*-Mes), 2.27 (s, 1.7H, *anti*-Mes), 2.23 (s, 3H, *syn*-Mes), 1.96 (d,  $J$  = 0.9 Hz, 7.7H, Th-Me). <sup>13</sup>C NMR could not be recorded due to lack of sample. <sup>11</sup>B NMR (160 MHz, CD<sub>2</sub>Cl<sub>2</sub>)  $\delta$  = 55.5. APCI-MS Calcd for C<sub>28</sub>H<sub>30</sub>B<sub>2</sub>S<sub>2</sub> : M<sup>+</sup>: 452.19794, Found: 452.19821. m.p. 202.5-205.0 °C.

#### Synthesis of **B-3<sup>Tip</sup>**

**9<sup>Tip-Br</sup>** was prepared from 465 mg (1.00 mmol) of **syn-8<sup>Tip</sup>** and 1.00 mL (1.00 mmol) of 1.0 mol/L BBr<sub>3</sub> in dichloromethane, and 10 mL of dichloromethane as a brown solid in a manner similar to that of **3<sup>Br</sup>**. The product was used in the next step without further purification. NMR data of **9<sup>Tip-Br</sup>**: <sup>1</sup>H NMR (500 MHz, CDCl<sub>3</sub>)  $\delta$  = 7.42 (d,  $J$  = 0.9, 2H, Th), 6.98 (s, 2H, Tip), 2.98–2.88 (m, 2H, Tip), 2.73–2.64 (m, 1H, Tip), 2.53 (d,  $J$  = 0.9 Hz, 6H, Th-Me), 1.31 (d,  $J$  = 6.9, 6H, Tip), 1.15 (d,  $J$  = 6.7 Hz, 12H, Tip). <sup>11</sup>B NMR (160 MHz, CDCl<sub>3</sub>)  $\delta$  = 52.5.



**B-3**<sup>Tip</sup> was prepared from **9**<sup>Tip-Br</sup> synthesized above, 2.10 mL (1.45 mmol) of 0.69 mol/L 2-tripylmagnesium bromide in THF, and 10 mL of toluene as a yellowish powder as a **syn-3**<sup>Tip</sup>: **anti-3**<sup>Tip</sup> = 96:4 mixture (173 mg, 0.279 mmol, 28% yield in the two steps) in a manner similar to that of **A-3**<sup>Mes</sup>. NMR data of **syn-3**<sup>Tip</sup>: <sup>1</sup>H NMR (400 MHz, CDCl<sub>3</sub>) δ = 7.00 (s, 2H, Tip), 6.99 (s, 2H, Tip), 6.90 (d, *J* = 1.0 Hz, 2H, Th), 3.00–2.88 (m, 2H, Tip), 2.76–2.66 (m, 2H, Tip), 2.61–2.52 (m, 2H, Tip), 2.43 (d, *J* = 0.8 Hz, 6H, Th-Me), 1.32 (d, *J* = 6.9 Hz, 12H, Tip), 1.31 (d, *J* = 6.9 Hz, 12H, Tip), 1.17 (d, *J* = 6.7 Hz, 12H, Tip), 1.12 (d, *J* = 6.7 Hz, 12H, Tip). <sup>13</sup>C NMR (126 MHz, CDCl<sub>3</sub>) δ = 156.0 (br, B–C), 155.1 (br, B–C), 151.2, 149.8, 149.1, 148.5, 148.0, 139.1 (br, B–C), 137.1 (br, B–C), 136.0, 119.9, 119.8, 35.4, 35.4, 34.24, 34.20, 24.47, 24.46, 24.14, 24.10, 15.4. <sup>11</sup>B NMR (160 MHz, CDCl<sub>3</sub>) δ = 56.1. APCI-MS Calcd for C<sub>40</sub>H<sub>54</sub>B<sub>2</sub>S<sub>2</sub> : M<sup>+</sup>: 620.38610, Found: 620.38715. m.p. 236.5-238.6 °C.

### References

[S1] W.-M. Wan, F. Cheng and F. Jäkle, *Angew. Chem. Int. Ed.*, 2014, **53**, 8934.

[S2] P. Gans, A. Sabatini, A. Vacca, *Talanta* 1996, **43**, 1739.

## Figures and Tables

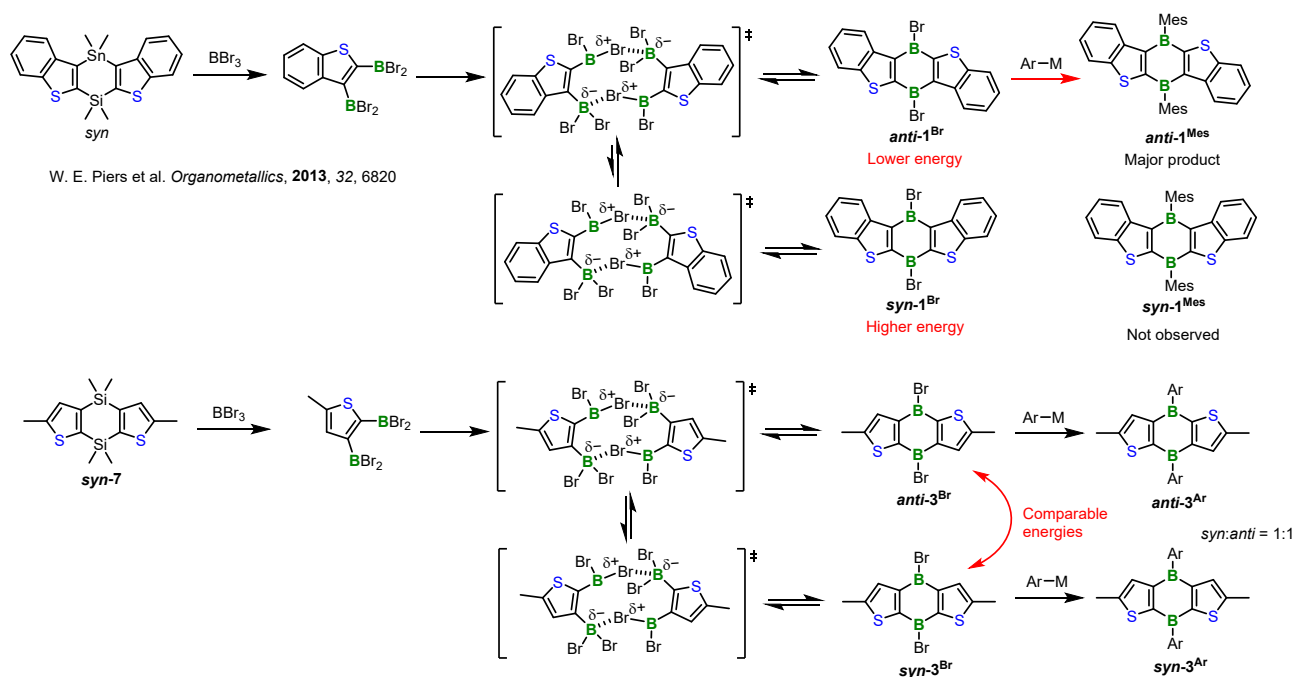

**Figure S1** Plausible reaction mechanism for the formation of diborinines from *syn* precursors.

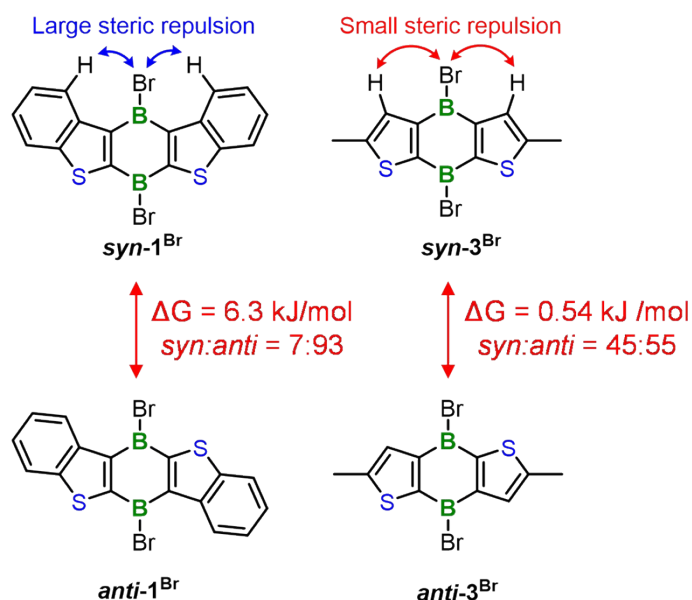

**Figure S2** DFT-calculated Gibbs free energy differences at the B3LYP/6-31G(d) level at 298 K.

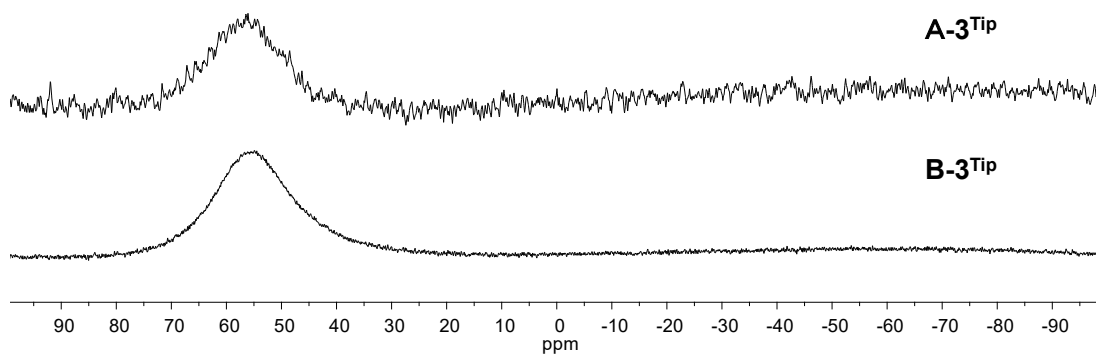

**Figure S3**  $^{11}\text{B}$  NMR spectra of **A-3<sup>Tip</sup>** and **B-3<sup>Tip</sup>** in  $\text{CDCl}_3$  at room temperature.

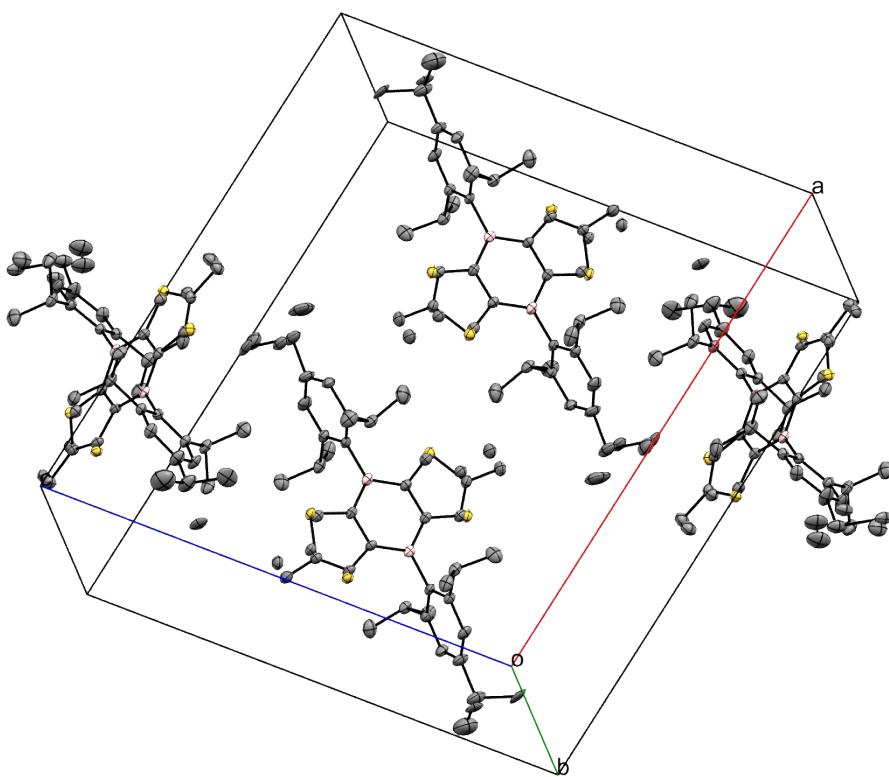

**Figure S4** Crystal packing structure of *syn*-3<sup>Tip</sup> obtained at 100 K. Thermal ellipsoids are at the 50% probability level. Hydrogen atoms are omitted for clarity.

**Table S1** Experimental and DFT-calculated bond lengths in diborinine rings of dithienodiborinines.

|       | <i>syn-3</i> <sup>Tip</sup> | <i>anti-1</i> <sup>Mes</sup> | <b>2</b> <sup>Mes</sup> | <i>syn-3</i> <sup>Tip</sup> | <i>anti-1</i> <sup>Mes</sup> | <b>2</b> <sup>Mes</sup> |
|-------|-----------------------------|------------------------------|-------------------------|-----------------------------|------------------------------|-------------------------|
|       | SC                          | SC                           | SC                      | DFT                         | DFT                          | DFT                     |
| B1-C1 | 1.551                       | 1.552                        | 1.551                   | 1.543                       | 1.552                        | 1.548                   |
| C1-C2 | 1.398                       | 1.388                        | 1.463                   | 1.395                       | 1.387                        | 1.462                   |
| C2-B2 | 1.552                       | 1.556                        | 1.552                   | 1.558                       | 1.554                        | 1.548                   |
| B2-C3 | 1.554                       | 1.552                        | 1.551                   | 1.558                       | 1.552                        | 1.548                   |
| C3-C4 | 1.393                       | 1.388                        | 1.463                   | 1.395                       | 1.387                        | 1.462                   |
| C4-B1 | 1.551                       | 1.556                        | 1.552                   | 1.543                       | 1.554                        | 1.548                   |

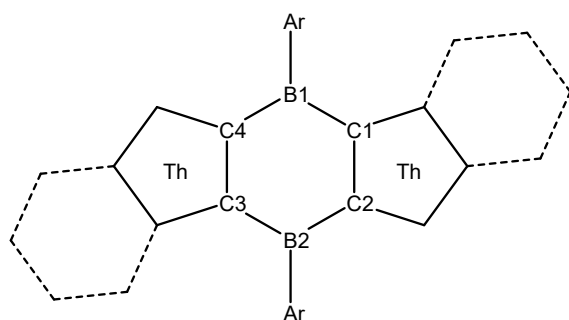

**Table S2** TD-DFT results at the B3LYP-D3(BJ)/6-31G(d) level of theory.

| Compound                     | Excited State | Composition | Contribution /% | Excitation energy /eV | Wavelength /nm | Oscillator strength |
|------------------------------|---------------|-------------|-----------------|-----------------------|----------------|---------------------|
| <i>syn-3</i> <sup>Mes</sup>  | S0→S1         | H→L         | 99              | 2.37                  | 524            | 0.03                |
|                              | S0→S3         | H-2→L       | 99              | 2.59                  | 479            | 0.02                |
|                              | S0→S6         | H-5→L       | 97              | 3.51                  | 353            | 0.16                |
|                              | S0→S7         | H-6→L       | 96              | 3.58                  | 346            | 0.03                |
|                              |               | H→L+1       | 3               |                       |                |                     |
|                              | S0→S8         | H-7→L       | 96              | 4.07                  | 305            | 0.17                |
|                              | S0→S13        | H-4→L+2     | 17              | 5.13                  | 242            | 0.13                |
|                              |               | H-4→L+4     | 5               |                       |                |                     |
|                              |               | H-2→L+1     | 22              |                       |                |                     |
|                              |               | H-2→L+5     | 12              |                       |                |                     |
|                              |               | H-1→L+1     | 2               |                       |                |                     |
|                              |               | H-1→L+5     | 2               |                       |                |                     |
|                              |               | H→L+2       | 37              |                       |                |                     |
|                              | S0→S16        | H-4→L+2     | 22              | 5.15                  | 241            | 0.18                |
|                              |               | H-4→L+4     | 8               |                       |                |                     |
|                              |               | H-2→L+5     | 18              |                       |                |                     |
|                              | H-1→L+5       | 3           |                 |                       |                |                     |
|                              | H→L+2         | 46          |                 |                       |                |                     |
| <i>anti-3</i> <sup>Mes</sup> | S0→S1         | H→L         | 99              | 2.39                  | 518            | 0                   |
|                              | S0→S2         | H-1→L       | 99              | 2.51                  | 495            | 0.01                |
|                              | S0→S6         | H-5→L       | 97              | 3.36                  | 369            | 0.18                |
|                              |               | H→L+1       | 3               |                       |                |                     |
|                              | S0→S8         | H-7→L       | 95              | 4.04                  | 307            | 0.22                |
|                              |               | H→L+1       | 2               |                       |                |                     |
|                              | S0→S14        | H-7→L       | 2               | 4.93                  | 251            | 0.49                |
|                              |               | H-5→L       | 3               |                       |                |                     |
|                              |               | H-2→L+1     | 5               |                       |                |                     |
|                              |               | H→L+1       | 86              |                       |                |                     |

**Table S3** Calculated NICS values at the B3LYP/6-31G(d,p) level based on the optimized structures.

| Compound                     | NICS(1)  |          | NICS(1) <sub>zz</sub> |          | NICS(0)  |          | NICS(0) <sub>zz</sub> |          |
|------------------------------|----------|----------|-----------------------|----------|----------|----------|-----------------------|----------|
|                              | <i>A</i> | <i>B</i> | <i>A</i>              | <i>B</i> | <i>A</i> | <i>B</i> | <i>A</i>              | <i>B</i> |
| <i>anti-1</i> <sup>Mes</sup> | 8.0      | -7.8     | 29.0                  | -16.3    | 13.4     | -7.3     | 48.7                  | 7.6      |
| <i>syn-3</i> <sup>Mes</sup>  | 6.8      | -7.5     | 25.0                  | -16.4    | 12.0     | -7.1     | 43.7                  | 7.5      |
| <i>anti-3</i> <sup>Mes</sup> | 6.8      | -7.5     | 24.9                  | -16.4    | 12.0     | -7.1     | 43.7                  | 7.3      |
| <b>2</b> <sup>Mes</sup>      | 2.1      | -7.3     | 9.9                   | -14.8    | 6.8      | -7.1     | 26.9                  | 9.0      |

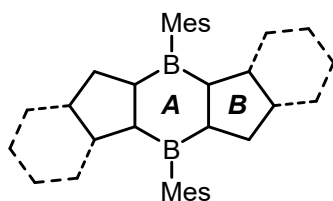**Table S4** Calculated FIA and GEI values based on the optimized structures.

| Compound                                     | FIA (kJ/mol) | GEI (eV) |
|----------------------------------------------|--------------|----------|
| Tris(pentafluorophenyl)borane                | 449.4        | 2.86     |
| <i>syn-3</i> <sup>Mes</sup>                  | 329.0        | 2.14     |
| <i>syn-3</i> <sup>Mes</sup> •F <sup>-</sup>  | 5.9          | -        |
| <i>anti-3</i> <sup>Mes</sup>                 | 327.8        | 2.13     |
| <i>anti-3</i> <sup>Mes</sup> •F <sup>-</sup> | 7.8          | -        |
| <i>anti-1</i> <sup>Mes</sup>                 | 358.4        | 2.44     |
| <i>anti-1</i> <sup>Mes</sup> •F <sup>-</sup> | 49.1         | -        |
| <b>2</b> <sup>Mes</sup>                      | 297.2        | 1.40     |
| <b>2</b> <sup>Mes</sup> •F <sup>-</sup>      | 26.6         | -        |
| <b>10</b>                                    | 289.8        | 1.45     |

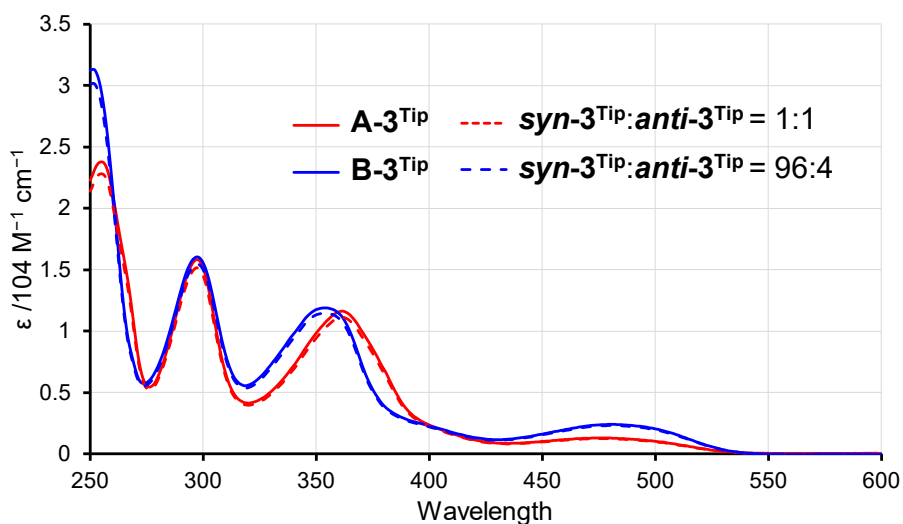

**Figure S5** Comparison of synthesized absorption spectra from the estimated spectra of *syn-3*<sup>Tip</sup> and *anti-3*<sup>Tip</sup> with the experimental absorption spectra of *A-3*<sup>Tip</sup> and *B-3*<sup>Tip</sup>.

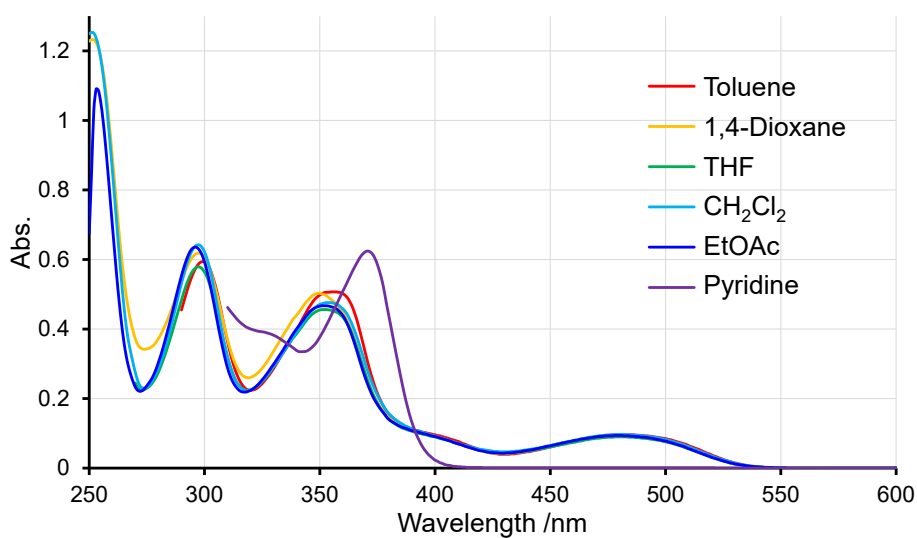

**Figure S5** Absorption spectra of *B-3*<sup>Tip</sup> in various solvents at the concentration of 0.04 mM.

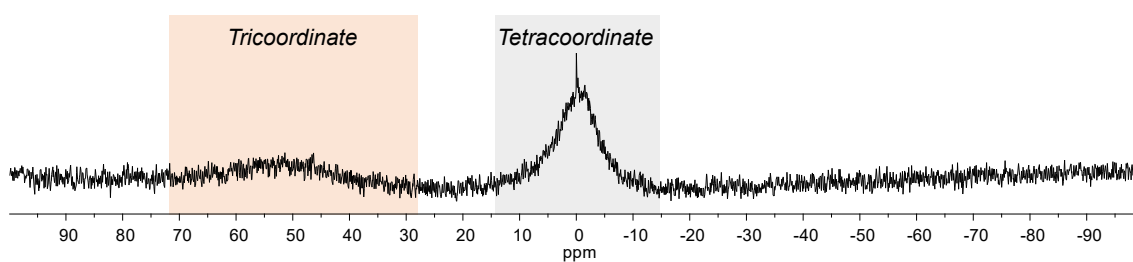

**Figure S6** <sup>11</sup>B NMR spectrum of *B-3*<sup>Tip</sup> in pyridine-*d*<sub>5</sub> at room temperature (160 MHz).

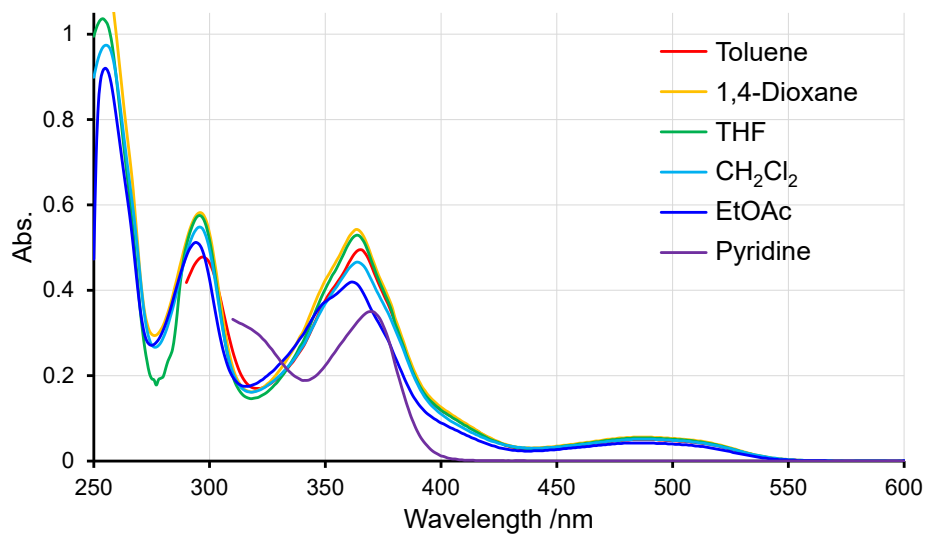

**Figure S7** Absorption spectra of **A-3<sup>Mes</sup>** in various solvents at the concentration of 0.04 mM.

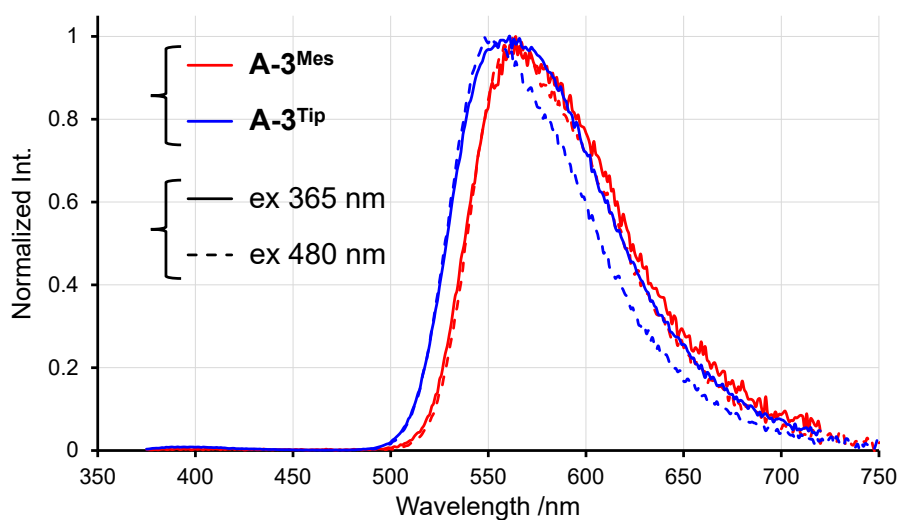

**Figure S8** Excitation wavelength dependence of fluorescence spectra of **A-3<sup>Mes</sup>** and **A-3<sup>Tip</sup>** in dichloromethane.



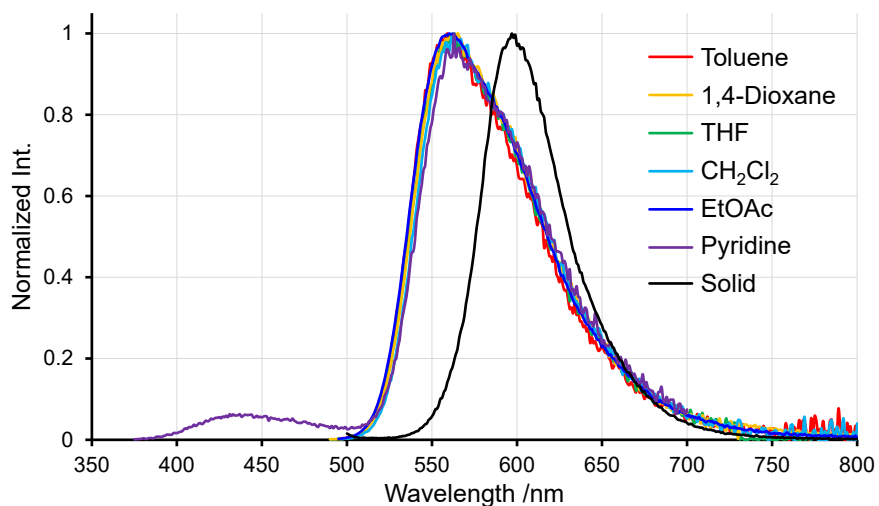

**Figure S9** Fluorescence spectra of **A-3<sup>Mes</sup>** in various solvents at the concentration of 0.04 mM.

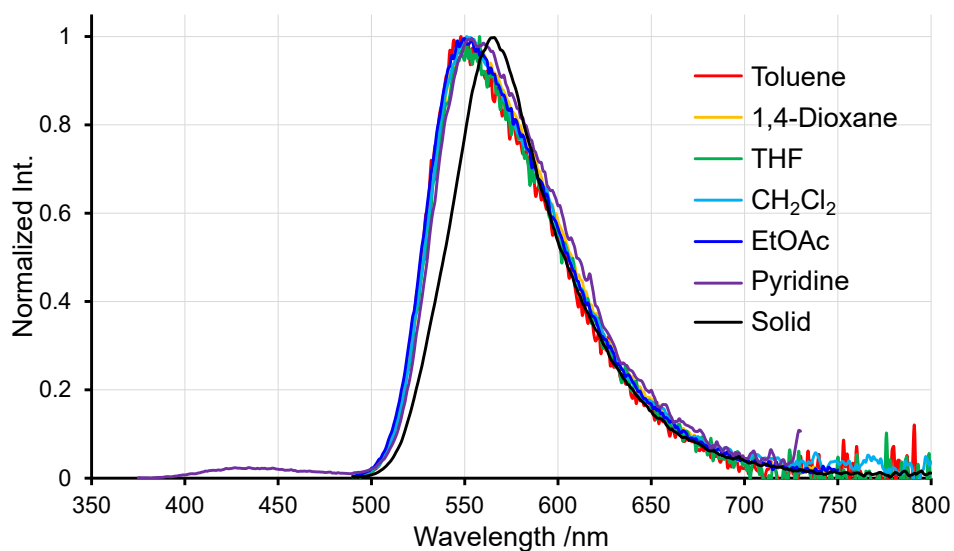

**Figure S10** Fluorescence spectra of **B-3<sup>Tip</sup>** in various solvents at the concentration of 0.04 mM.

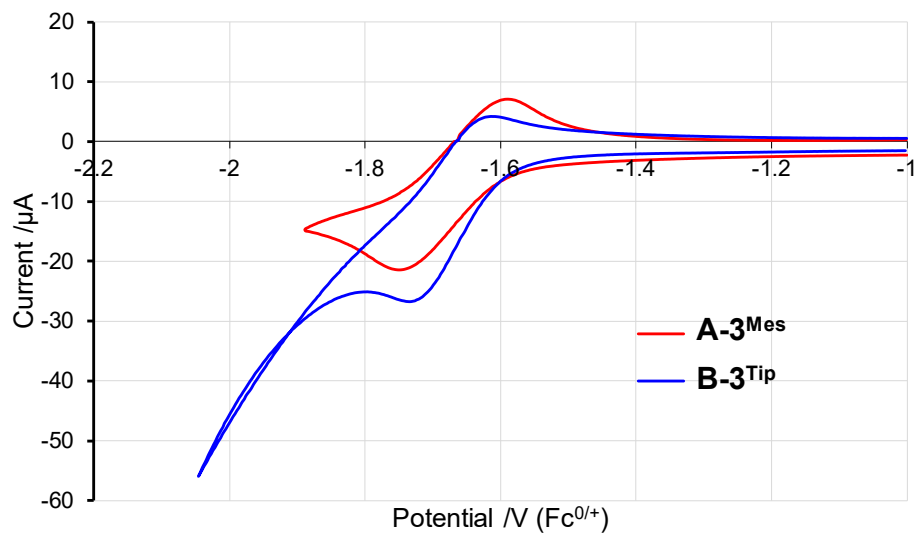

**Figure S11** Cathodic voltammograms of **A-3<sup>Mes</sup>** and **B-3<sup>Tip</sup>** in dichloromethane with 0.1 M TBAPF<sub>6</sub> at the scan rate of 50 mV/s.

**Table S5** Optical data of dithienodiborinines in various solvents.

|                          | Solvent                         | $\lambda_{\text{Abs}}^a$ /nm | $\lambda_{\text{FL}}^{480}$<br><i>b</i> /nm | $\lambda_{\text{FL}}^{365}$<br><i>c</i> /nm | $\Phi_{\text{FL}}^{480}$<br><i>d</i> /% | $\Phi_{\text{FL}}^{365}$<br><i>e</i> /% | $\tau^f$ /ns (%)             |
|--------------------------|---------------------------------|------------------------------|---------------------------------------------|---------------------------------------------|-----------------------------------------|-----------------------------------------|------------------------------|
| <b>A-3<sup>Mes</sup></b> | Toluene                         | 297, 365, 486                | 560                                         | 564                                         | 72                                      | 50                                      | 69                           |
|                          | Dioxane                         | 297, 364, 487                | 560                                         | 564                                         | 62                                      | 38                                      | 0.49 (18), 25 (82)           |
|                          | THF                             | 297, 364, 487                | 563                                         | 566                                         | 83                                      | 45                                      | 0.42 (29), 25 (71)           |
|                          | CH <sub>2</sub> Cl <sub>2</sub> | 297, 364, 487                | 564                                         | 564                                         | 71                                      | 45                                      | 77                           |
|                          | EtOAc                           | 294, 362, 485                | 560                                         | 563                                         | 70                                      | 44                                      | 0.42 (41), 28 (59)           |
|                          | Pyridine                        | 305, 370                     | -                                           | 563                                         | -                                       | 31                                      | 0.33 (92), 47 (8)            |
|                          | Solid                           | -                            | 597                                         | 593                                         | 20                                      | 20                                      | 23                           |
| <b>A-3<sup>Tip</sup></b> | Toluene                         | 299, 363, 475                | 547                                         | 557                                         | 75                                      | 47                                      | 69                           |
|                          | Dioxane                         | 297, 361, 473                | 551                                         | 565                                         | 70                                      | 46                                      | 0.42 (63), 56 (37)           |
|                          | THF                             | 297, 361, 475                | 555                                         | 565                                         | 67                                      | 40                                      | 39 (18), 81 (82)             |
|                          | CH <sub>2</sub> Cl <sub>2</sub> | 297, 361, 477                | 550                                         | 561                                         | 71                                      | 45                                      | 77                           |
|                          | EtOAc                           | 295, 360, 473                | 550                                         | 560                                         | 65                                      | 44                                      | 0.4 (70), 76 (30)            |
|                          | Pyridine                        | 306, 371                     | -                                           | 557                                         | 0                                       | 31                                      | 0.18 (88), 59 (12)           |
|                          | Solid                           | -                            | 563                                         | 559                                         | 78                                      | 81                                      | 87                           |
| <b>B-3<sup>Tip</sup></b> | Toluene                         | 299, 356, 482                | 548                                         | 550                                         | 82                                      | 82                                      | 67                           |
|                          | Dioxane                         | 297, 350, 479                | 553                                         | 554                                         | 72                                      | 81                                      | 0.45 (46), 56 (54)           |
|                          | THF                             | 297, 352, 480                | 558                                         | 550                                         | 72                                      | 75                                      | 72                           |
|                          | CH <sub>2</sub> Cl <sub>2</sub> | 297, 354, 480                | 553                                         | 553                                         | 81                                      | 81                                      | 74                           |
|                          | EtOAc                           | 296, 352, 479                | 550                                         | 552                                         | 61                                      | 76                                      | 0.30 (56), 76 (45)           |
|                          | Pyridine                        | 306, 371                     | -                                           | 553                                         | -                                       | 42                                      | 0.70 (20), 3.6 (43), 82 (37) |
|                          | Solid                           | -                            | 566                                         | 559                                         | 87                                      | 95                                      | 79                           |

<sup>a</sup> Absorption maxima. <sup>b</sup> Fluorescence maxima when excited at 480 nm. <sup>c</sup> Fluorescence maxima when excited at 365 nm. <sup>d</sup> Absolute quantum yield when excited at 480 nm. <sup>e</sup> Absolute quantum yield when excited at 365 nm. <sup>f</sup> Emission lifetime and contribution.

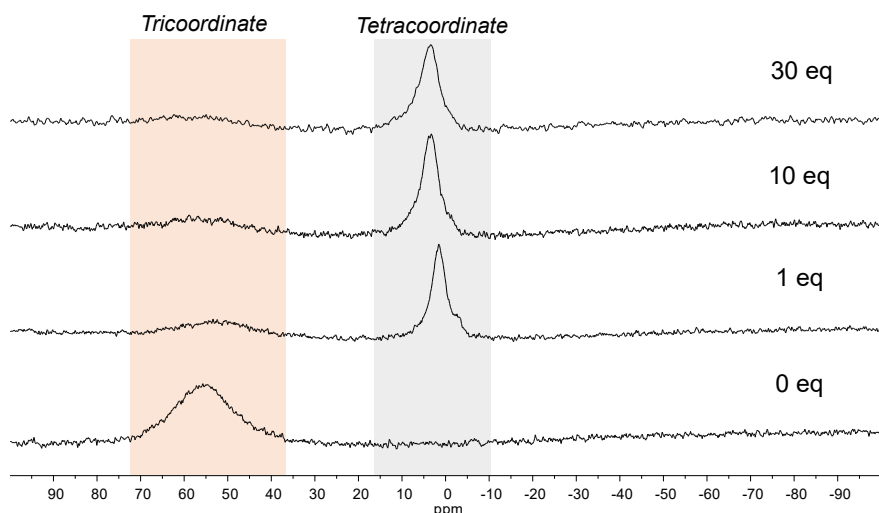

**Figure S12.**  $^{11}\text{B}$  NMR spectra of  $\text{B-3}^{\text{Tip}}$  before and after the addition of TBAF in  $\text{THF-}d_8$  at room temperature (160 MHz).

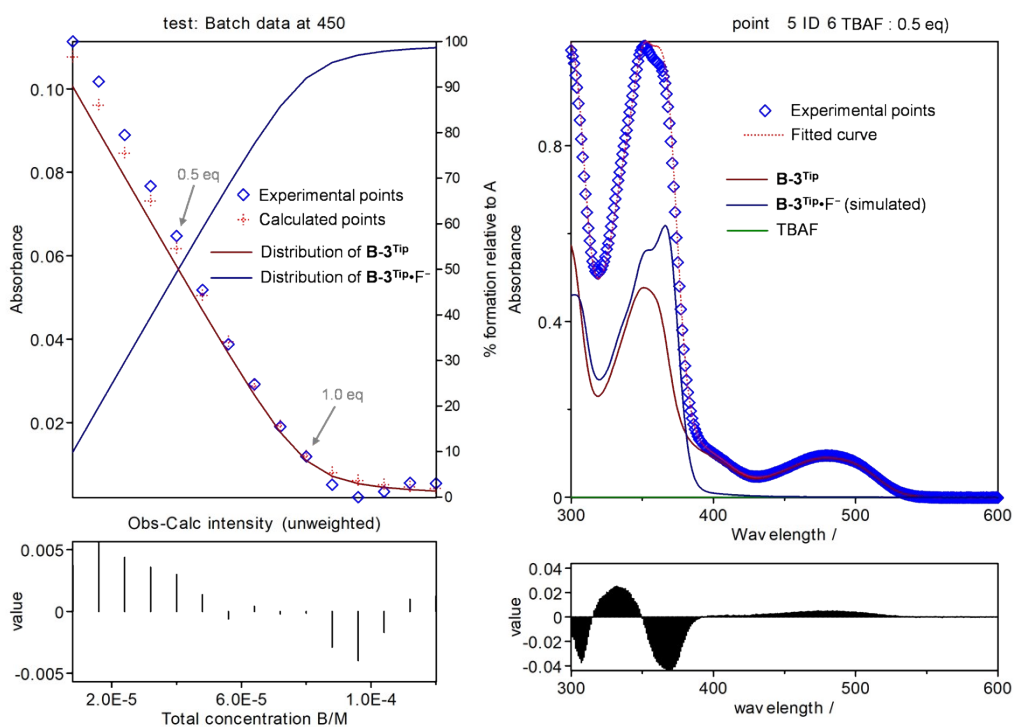

**Figure S13** Images exported from HypSpec Graphs showing the fitting over the whole spectrum. The titration experiment of  $\text{B-3}^{\text{Tip}}$  with TBAF was performed in THF at the concentration of 0.08 mM at room temperature.

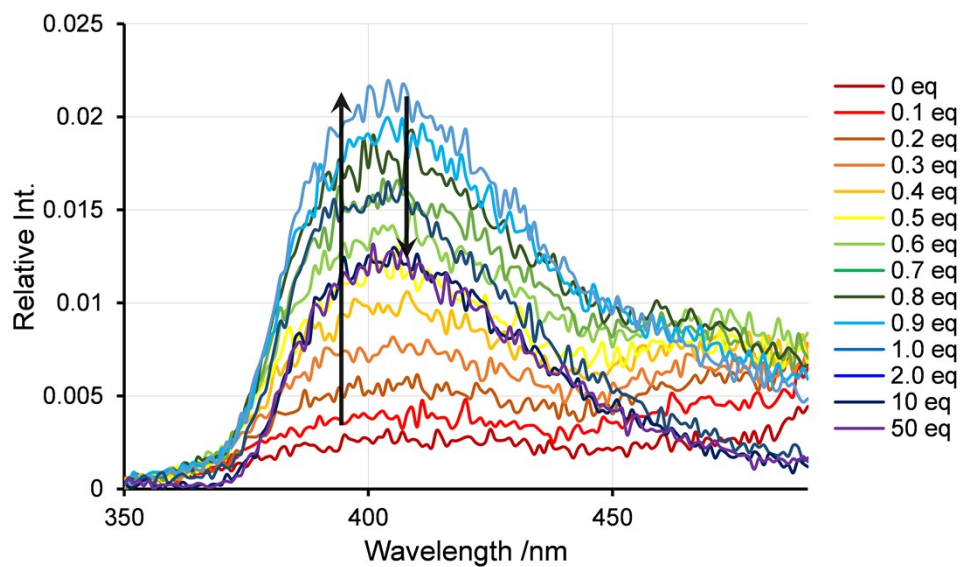

**Figure S14** Fluorescence data excited at 320 nm for titrations of **B-3**<sup>Tip</sup> with TBAF aliquots in THF at the concentration of 0.08 mM.

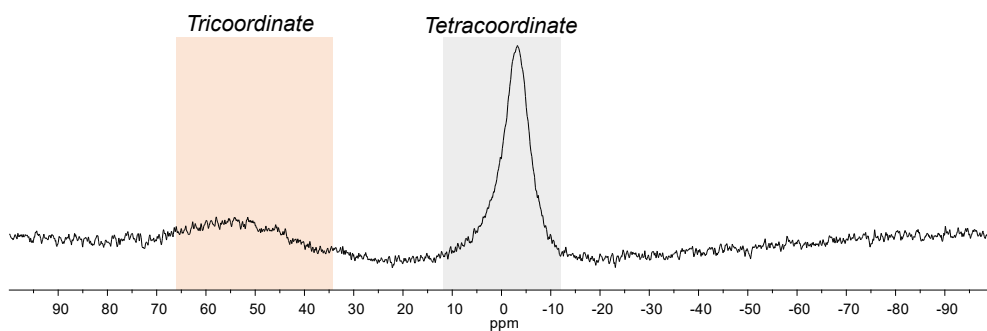

**Figure S15** <sup>11</sup>B NMR spectrum of **B-3**<sup>Tip</sup> in the presence of 140 equiv. of DMAP in CDCl<sub>3</sub> at room temperature (160 MHz).

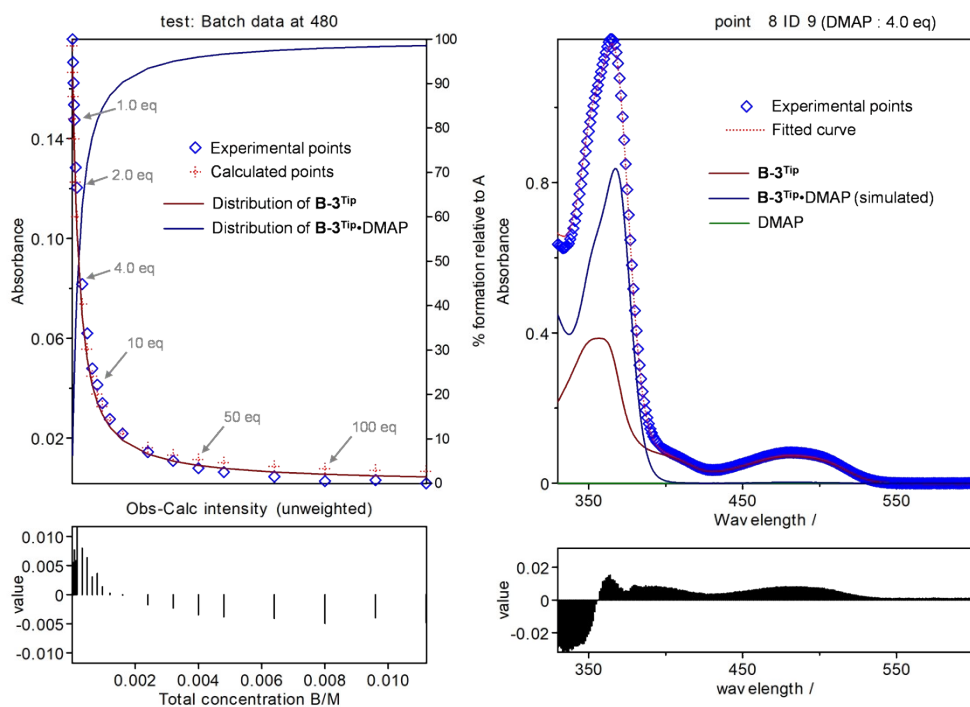

**Figure S16** Images exported from HypSpec Graphs showing the fitting over the whole spectrum. The titration experiment of **B-3<sup>Tip</sup>** with DMAP was performed in toluene at the concentration of 0.08 mM at room temperature.

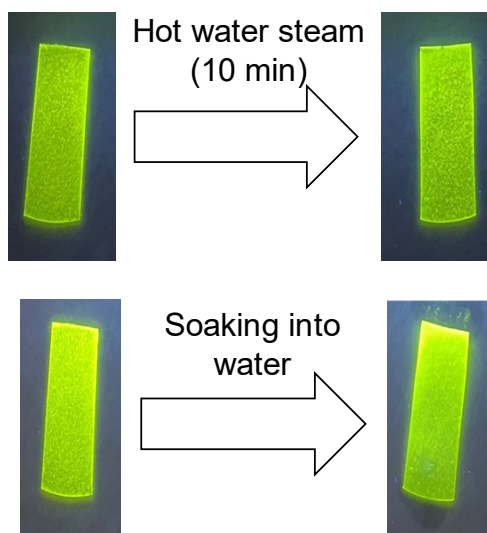

**Figure S17** Response of filter paper strips containing **B-3<sup>Tip</sup>** to water.

## NMR spectra

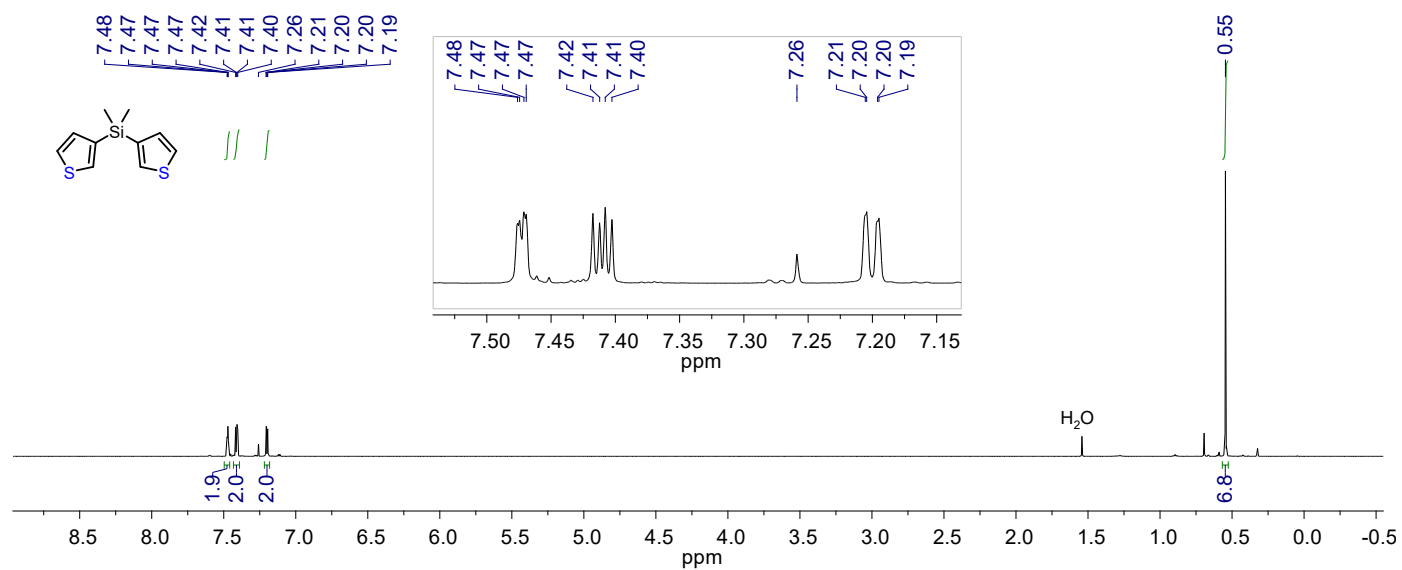

**Figure S18** <sup>1</sup>H NMR spectrum of **5** in CDCl<sub>3</sub> at room temperature (500 MHz).

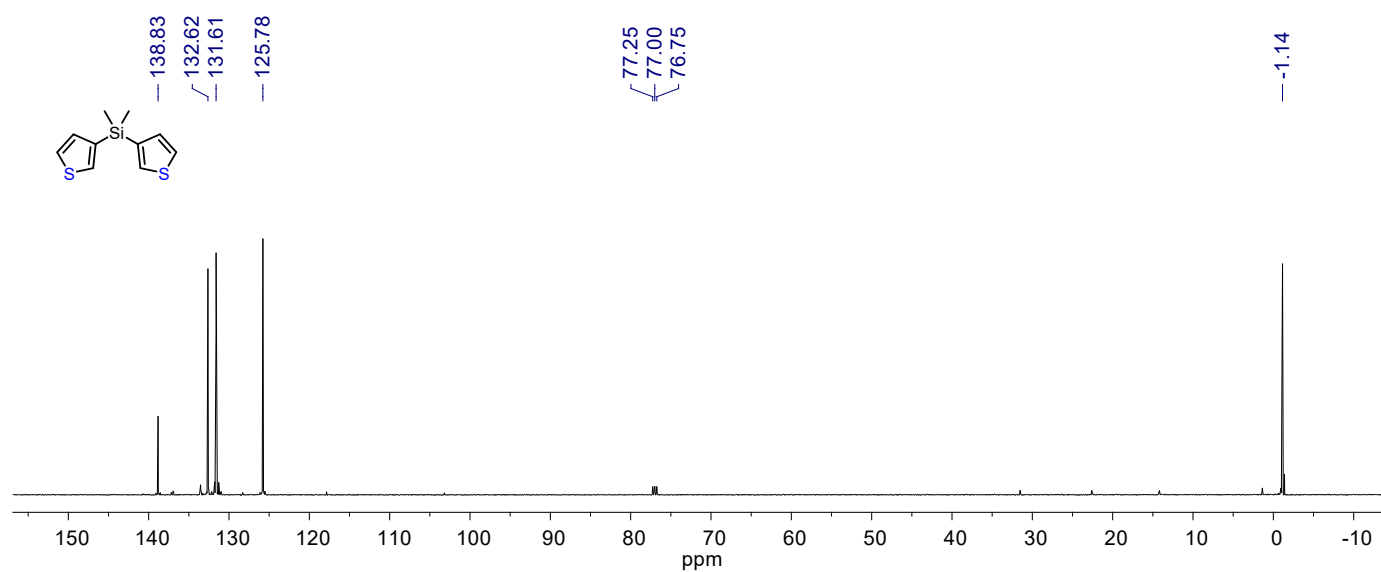

**Figure S19** <sup>13</sup>C NMR spectrum of **5** in CDCl<sub>3</sub> at room temperature (126 MHz).

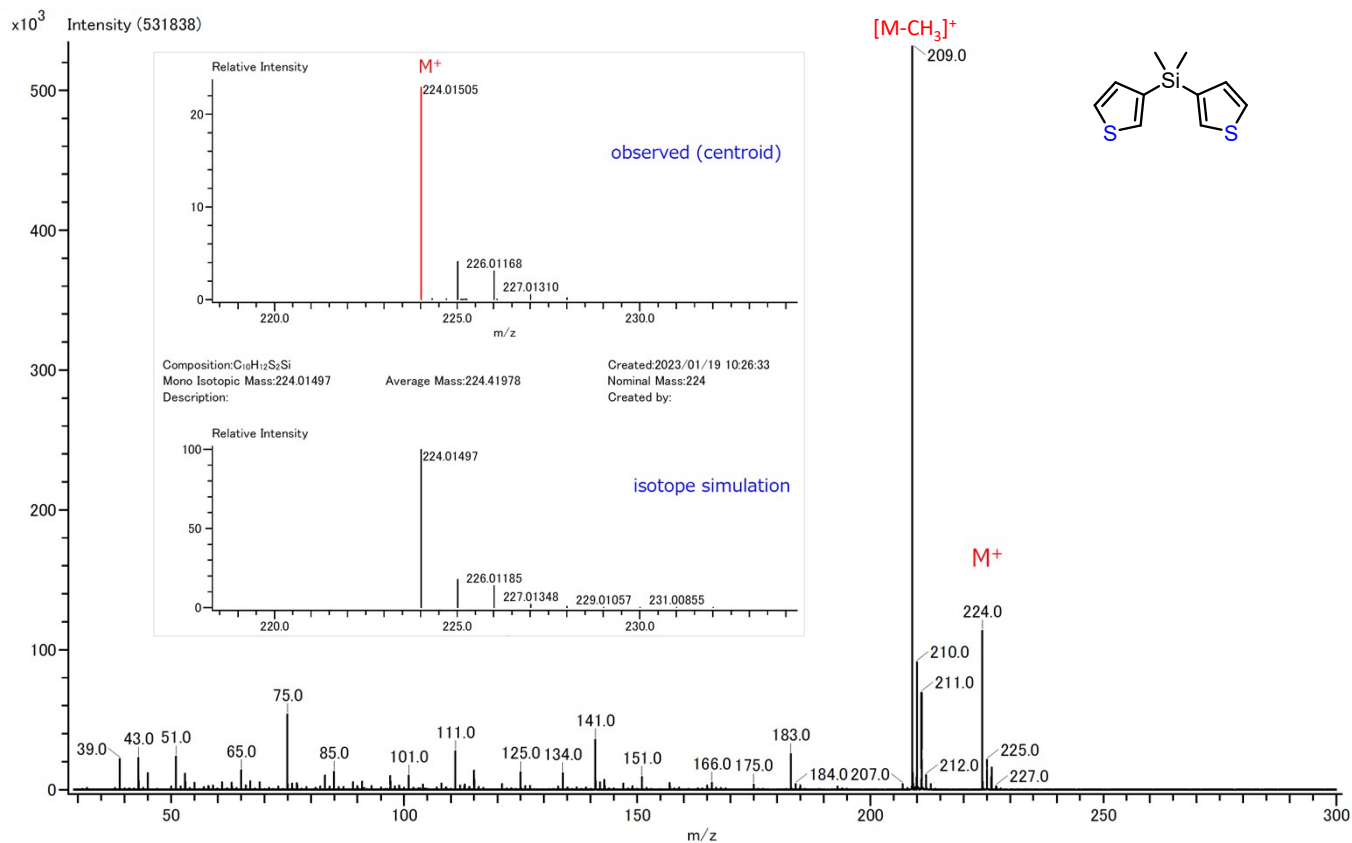

Figure S20 High resolution EI-mass spectrum of 5.

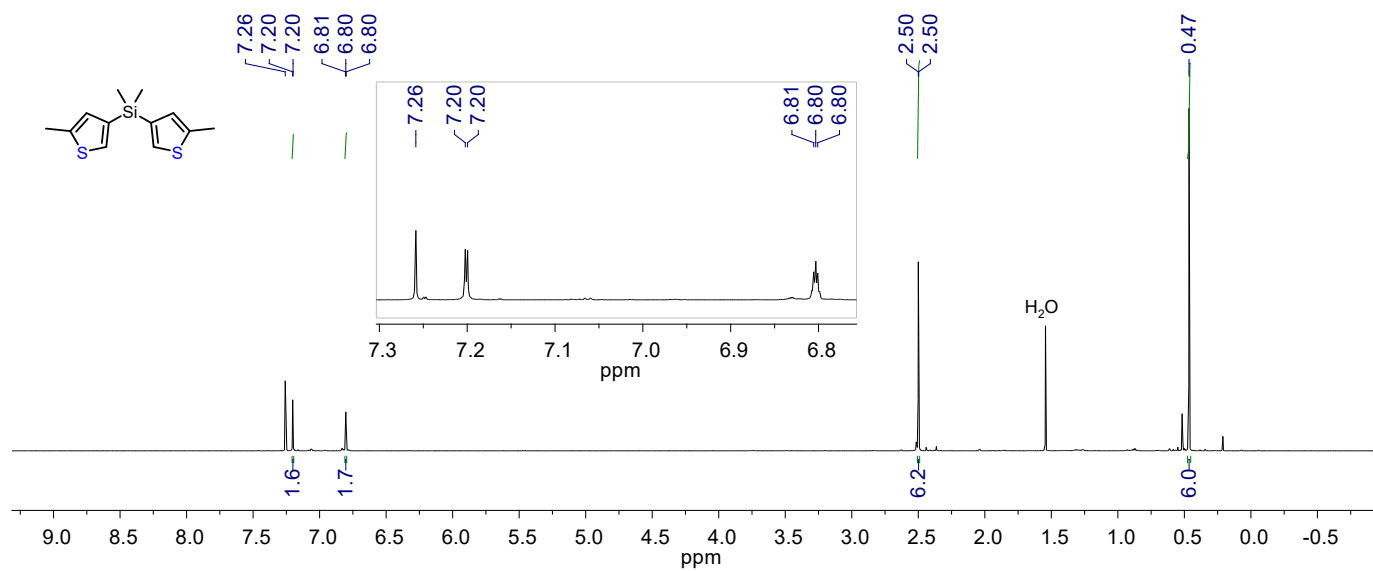

Figure S21 <sup>1</sup>H NMR spectrum of 6 in CDCl<sub>3</sub> at room temperature (500 MHz).



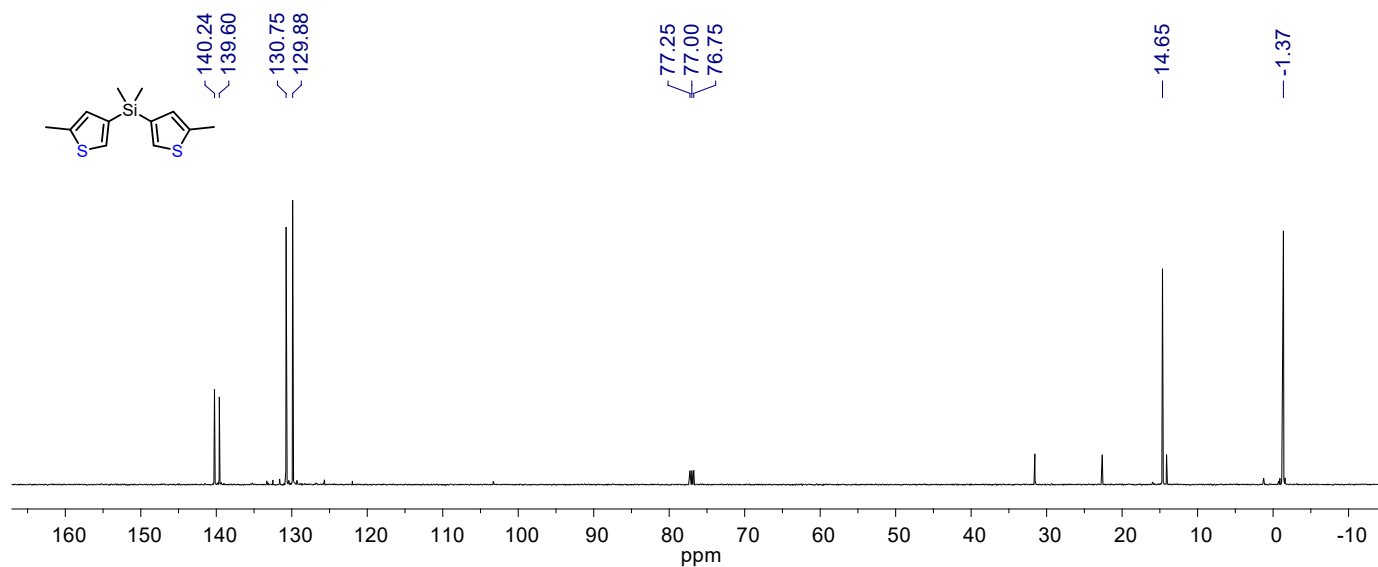

**Figure S22**  $^{13}\text{C}$  NMR spectrum of **6** in  $\text{CDCl}_3$  at room temperature (126 MHz).

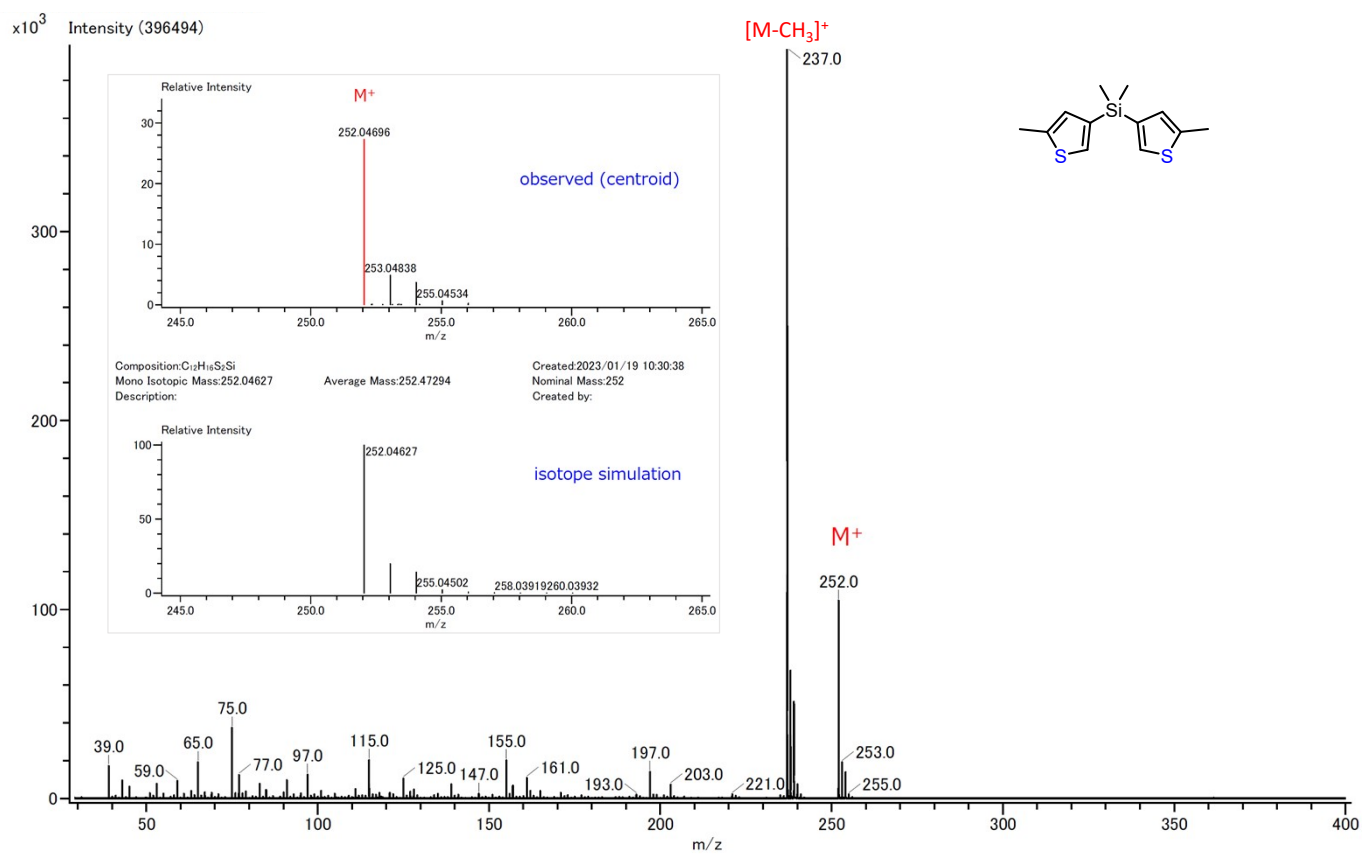

**Figure S23** High resolution EI-mass spectrum of **6**.

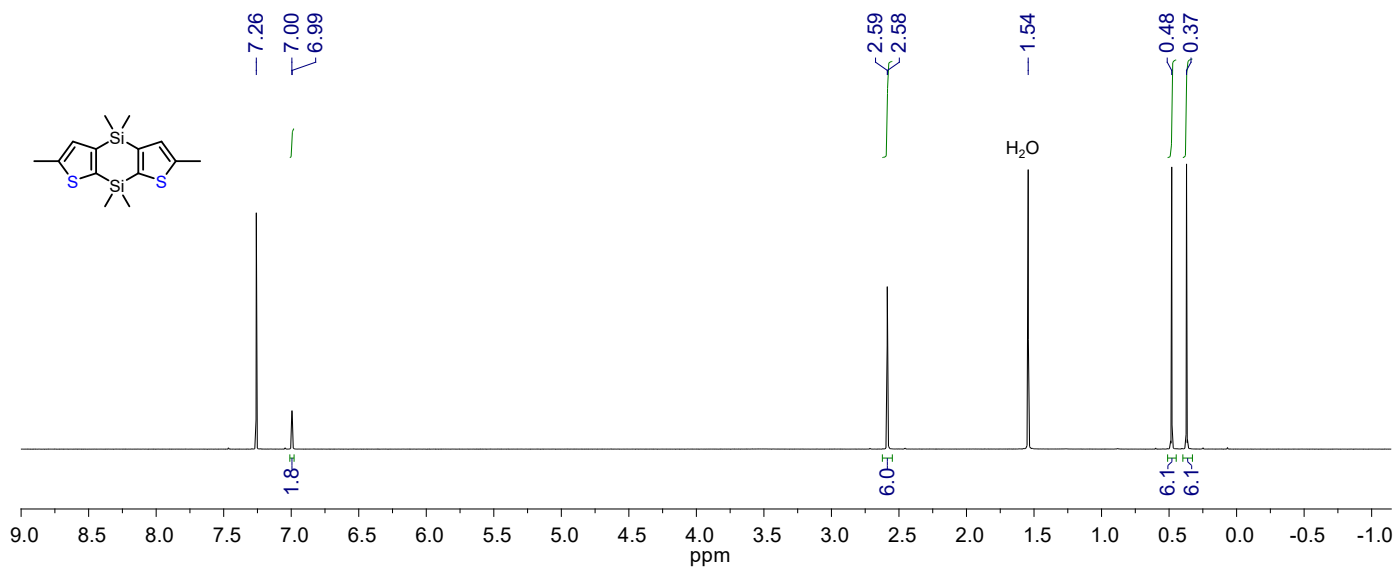

**Figure S24** <sup>1</sup>H NMR spectrum of *syn-7* in CDCl<sub>3</sub> at room temperature (500 MHz).

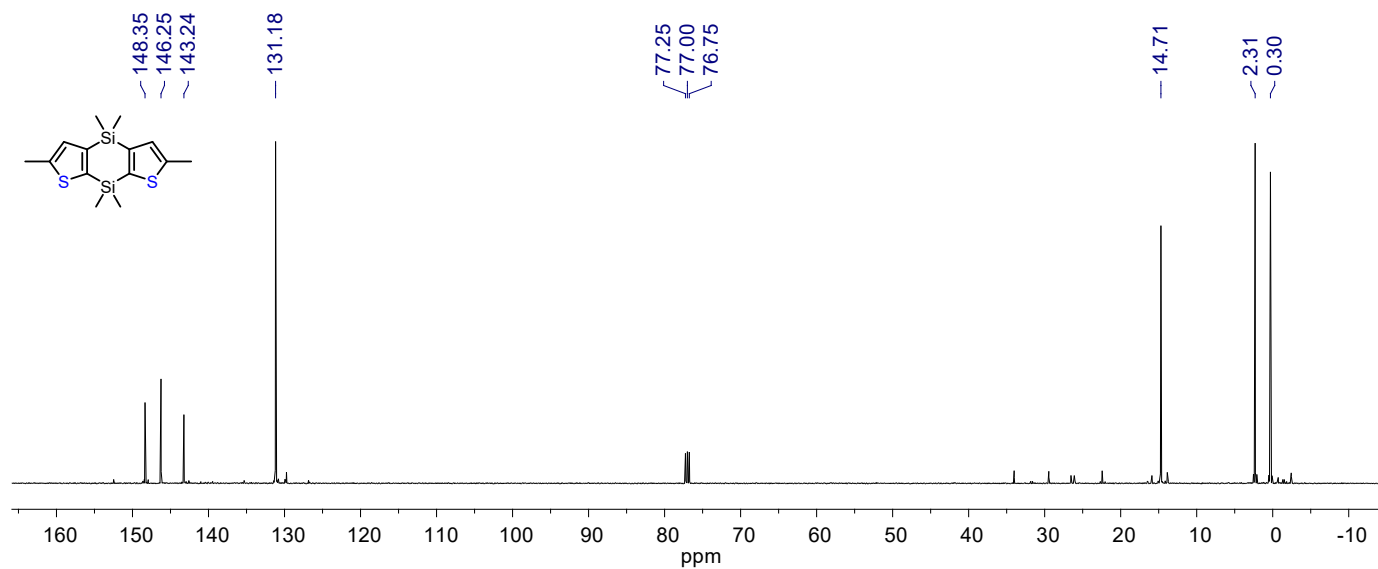

**Figure S25** <sup>13</sup>C NMR spectrum of *syn-7* in CDCl<sub>3</sub> at room temperature (126 MHz).

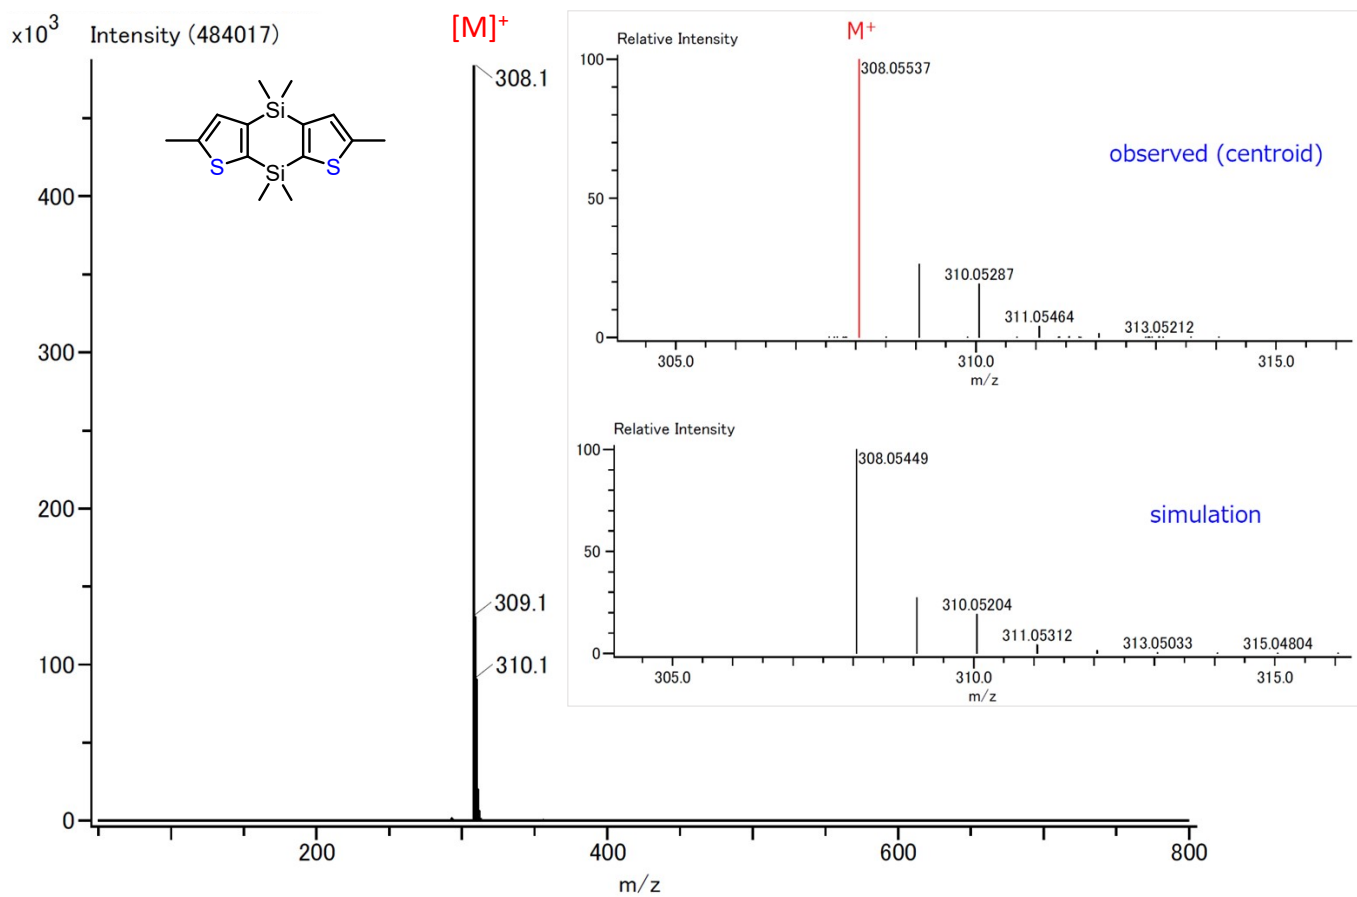

**Figure S26** High resolution FI-mass spectrum of *syn-7*.

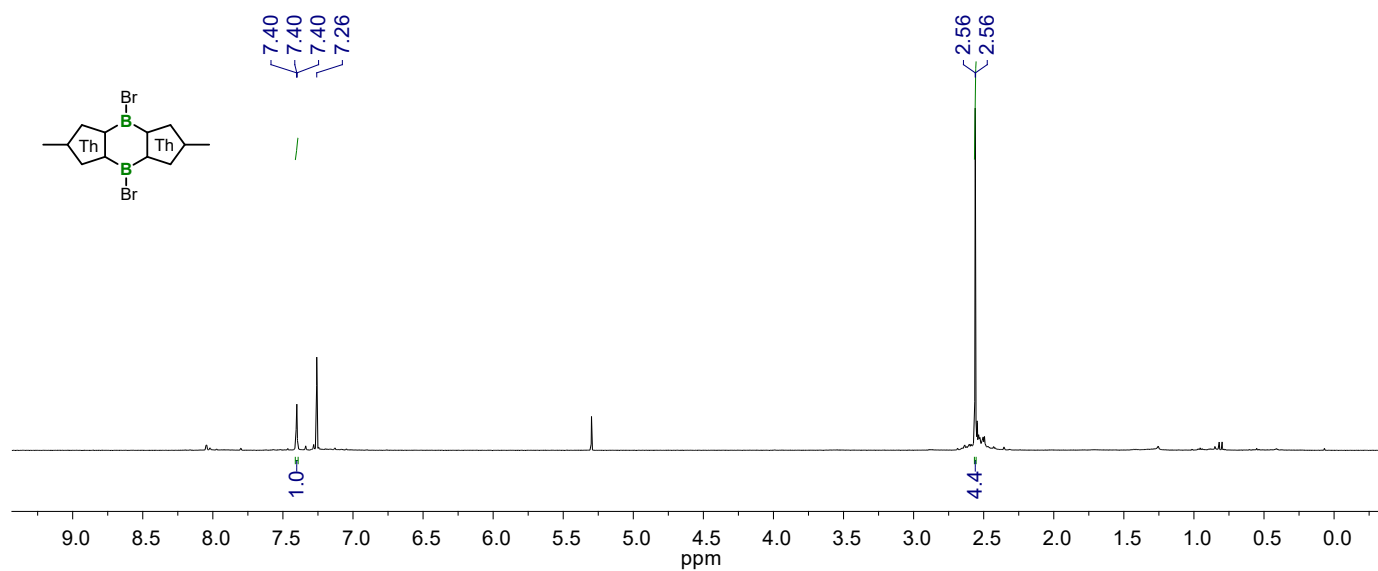

**Figure S27** <sup>1</sup>H NMR spectrum of **3<sup>Br</sup>** in CDCl<sub>3</sub> at room temperature (500 MHz).

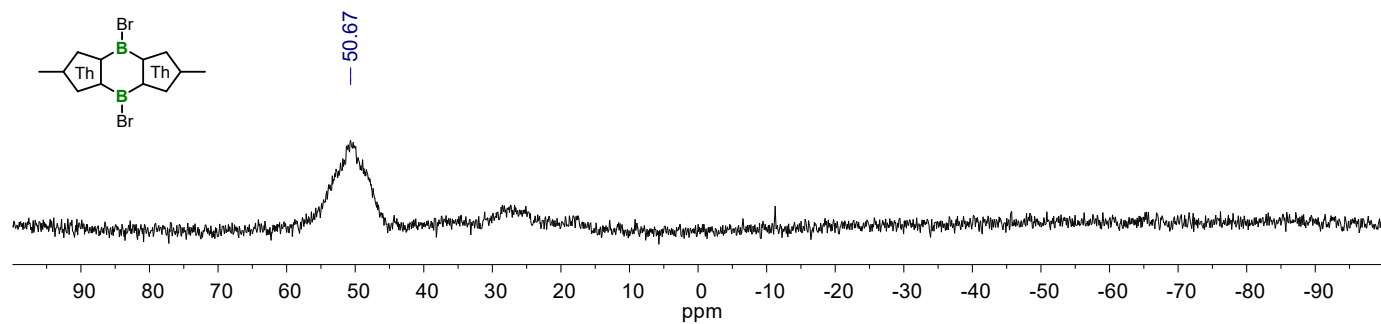

Figure S28  $^{11}\text{B}$  NMR spectrum of  $3^{\text{Br}}$  in  $\text{CDCl}_3$  at room temperature (160 MHz).

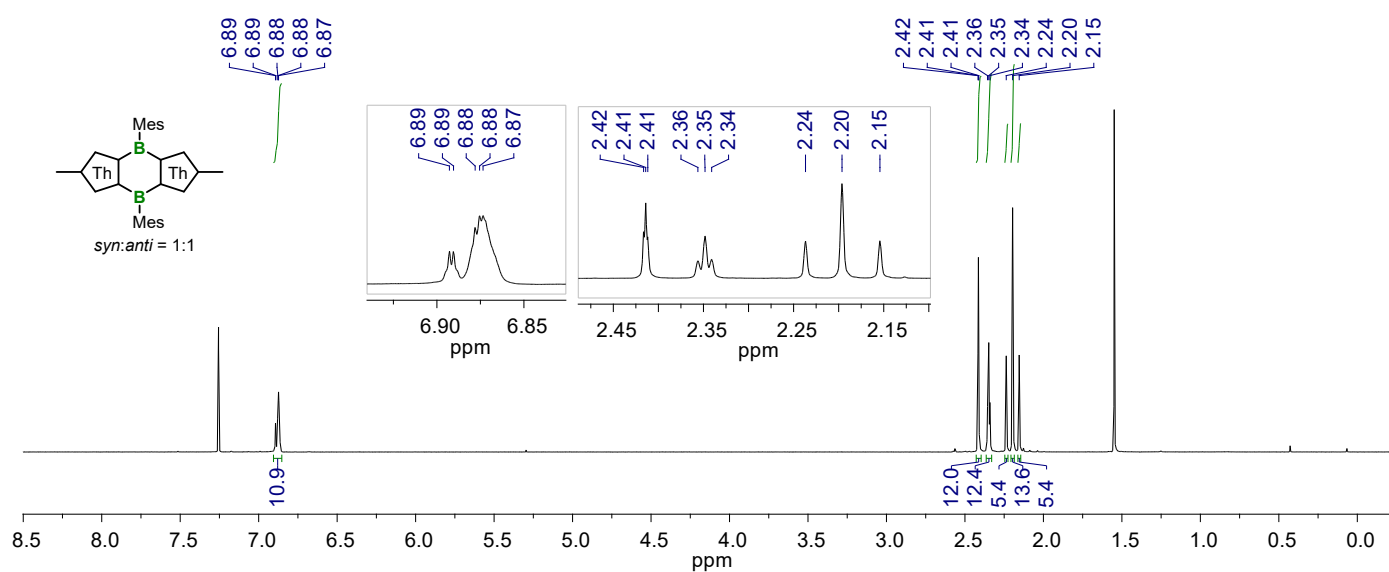

Figure S29  $^1\text{H}$  NMR spectrum of  $\text{A-}3^{\text{Mes}}$  in  $\text{CDCl}_3$  at room temperature (400 MHz).

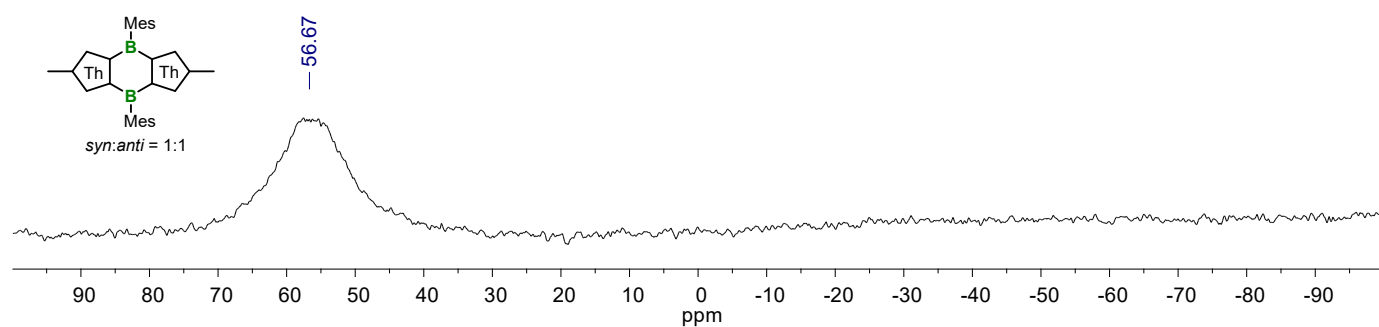

Figure S30  $^{11}\text{B}$  NMR spectrum of  $\text{A-}3^{\text{Mes}}$  in  $\text{C}_6\text{D}_6$  at room temperature (160 MHz).

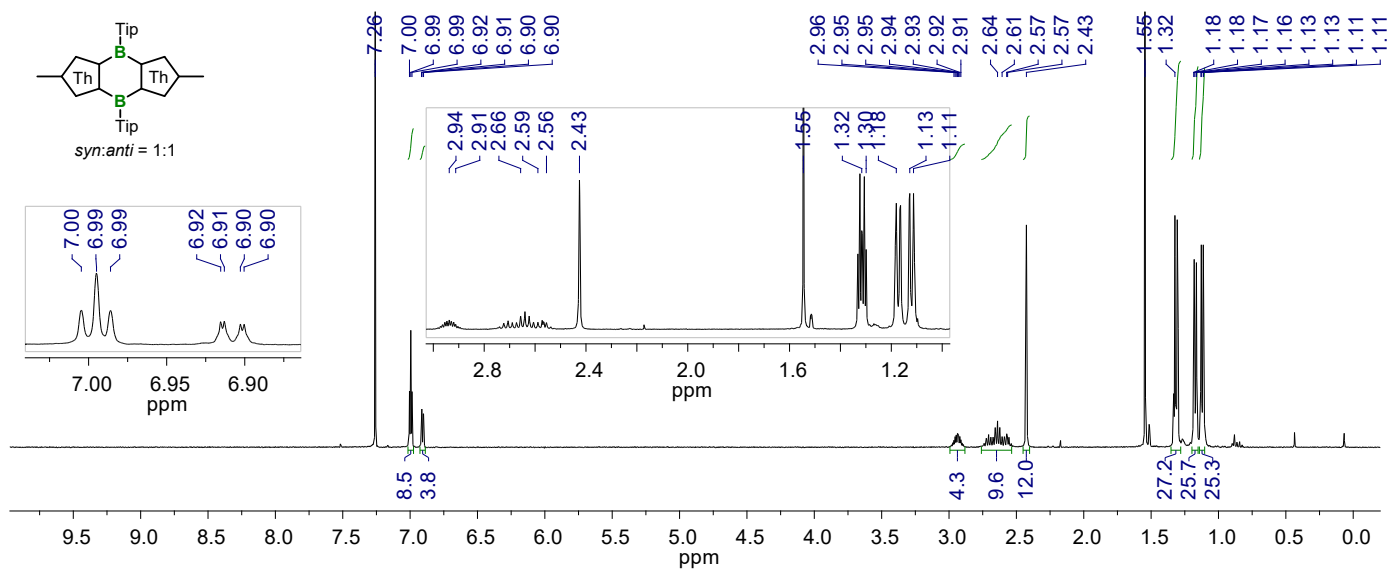

**Figure S31** <sup>1</sup>H NMR spectrum of **A-3**<sup>Tip</sup> in CDCl<sub>3</sub> at room temperature (400 MHz).

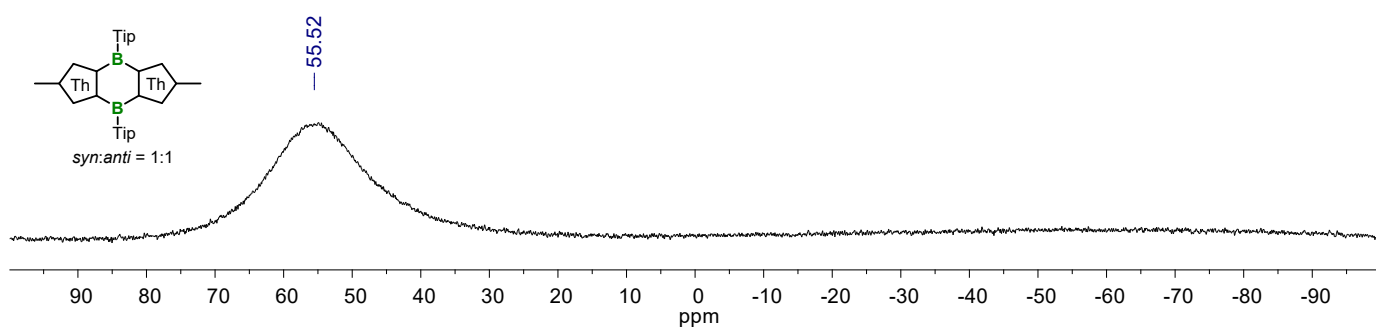

**Figure S32** <sup>11</sup>B NMR spectrum of **A-3**<sup>Tip</sup> in CDCl<sub>3</sub> at room temperature (160 MHz).

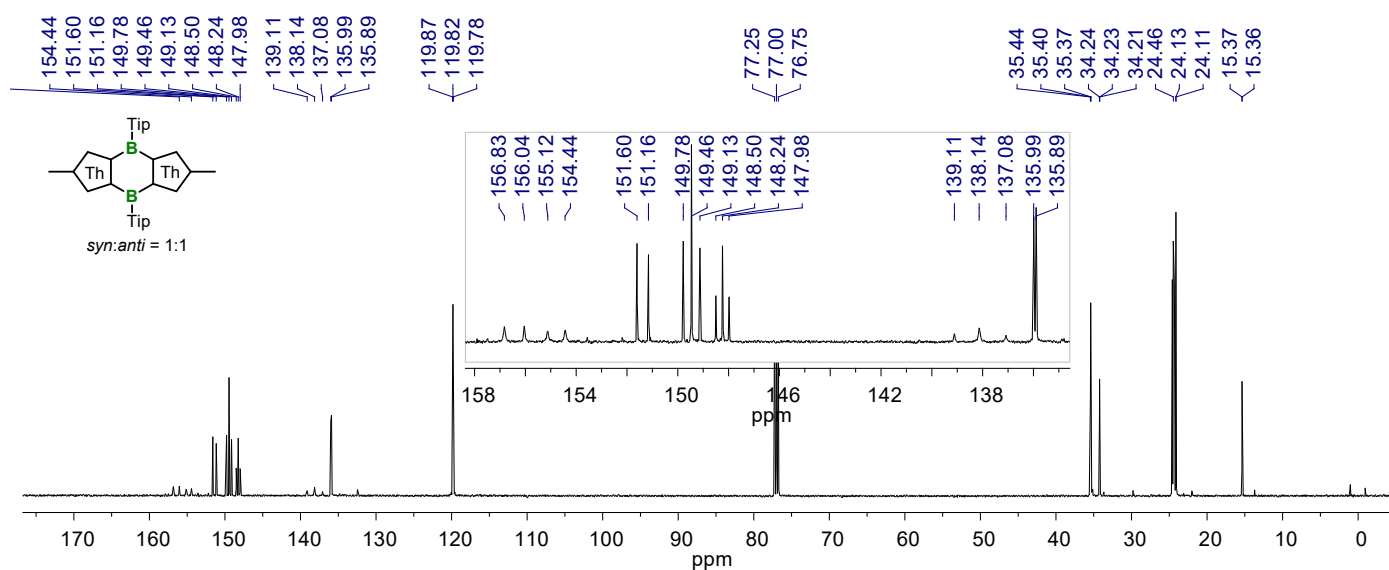

**Figure S33** <sup>13</sup>C NMR spectrum of **A-3**<sup>Tip</sup> in CDCl<sub>3</sub> at room temperature (126 MHz).

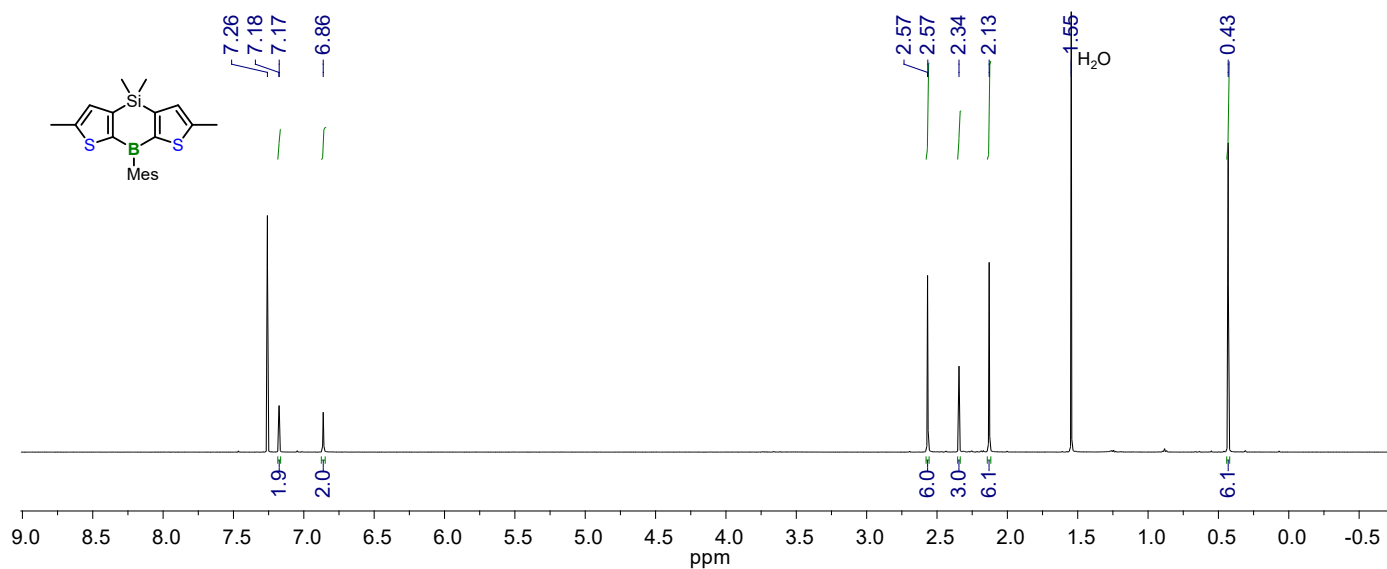

**Figure S34** <sup>1</sup>H NMR spectrum of *syn-8*<sup>Mes</sup> in CDCl<sub>3</sub> at room temperature (500 MHz).

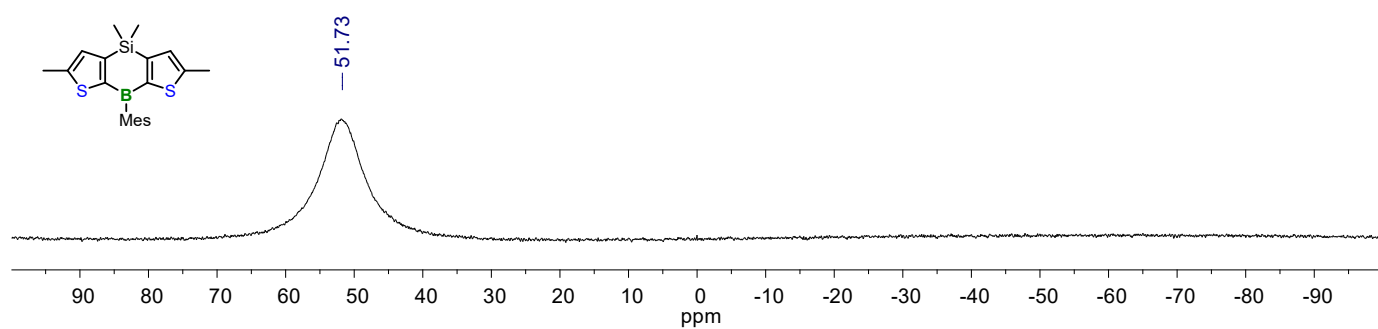

**Figure S35** <sup>11</sup>B NMR spectrum of *syn-8*<sup>Mes</sup> in CDCl<sub>3</sub> at room temperature (160 MHz).

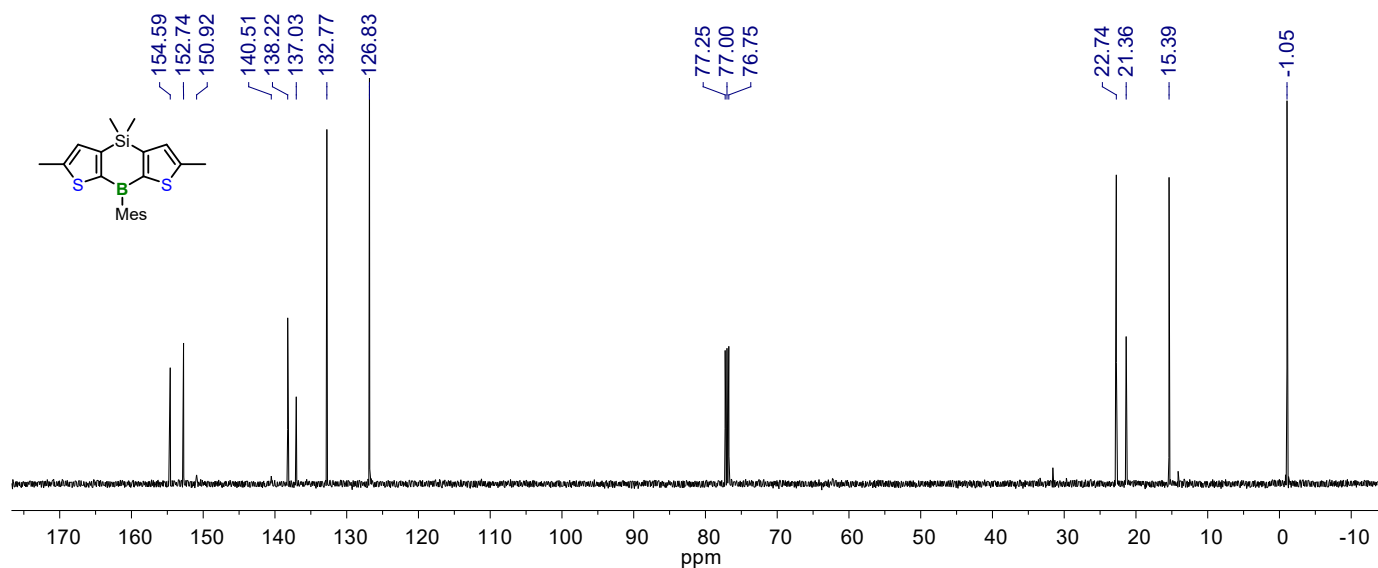

**Figure S36** <sup>13</sup>C NMR spectrum of *syn-8*<sup>Mes</sup> in CDCl<sub>3</sub> at room temperature (126 MHz).

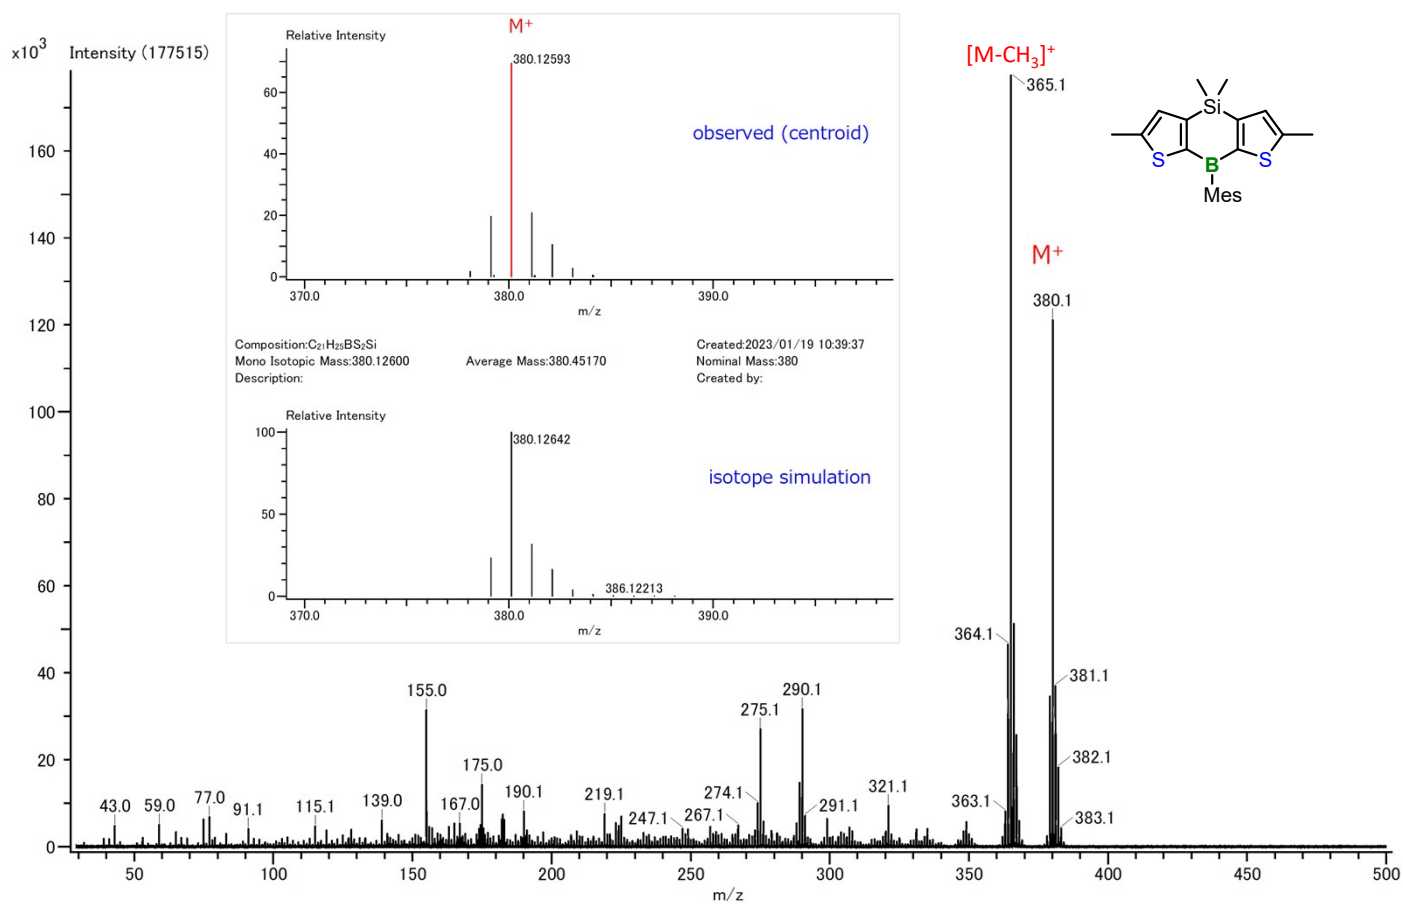

Figure S37 High resolution APCI-mass spectrum of *syn*-**8**<sup>Mes</sup>.

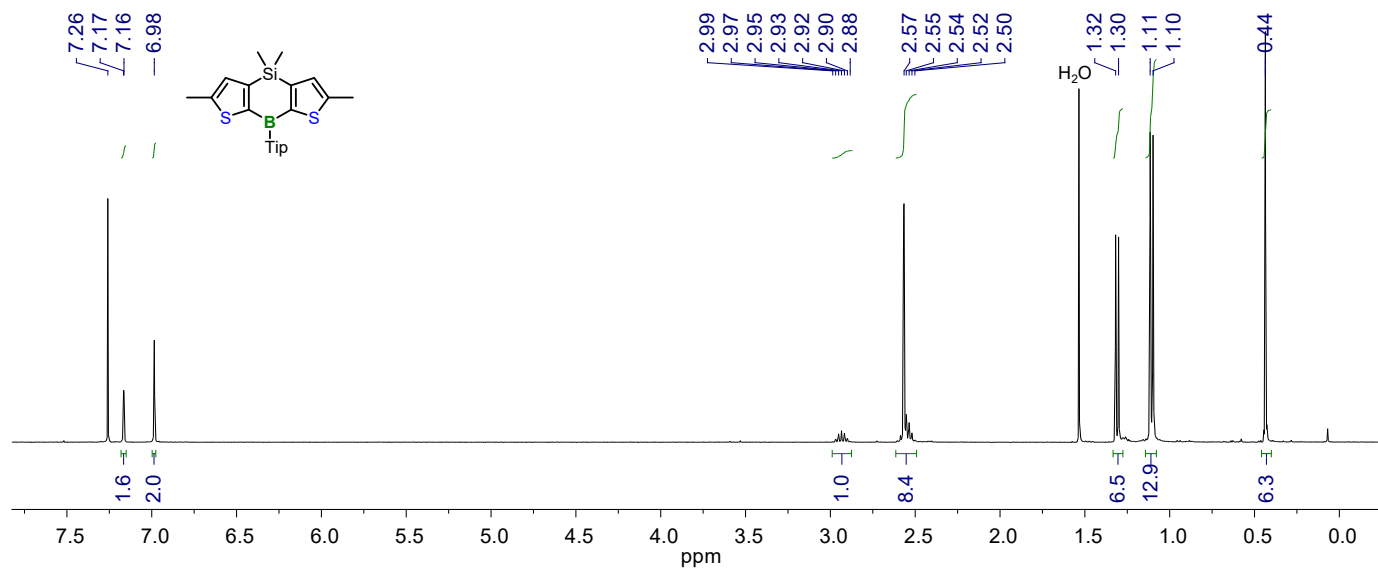

Figure S38 <sup>1</sup>H NMR spectrum of *syn*-**8**<sup>Tip</sup> in CDCl<sub>3</sub> at room temperature (400 MHz).

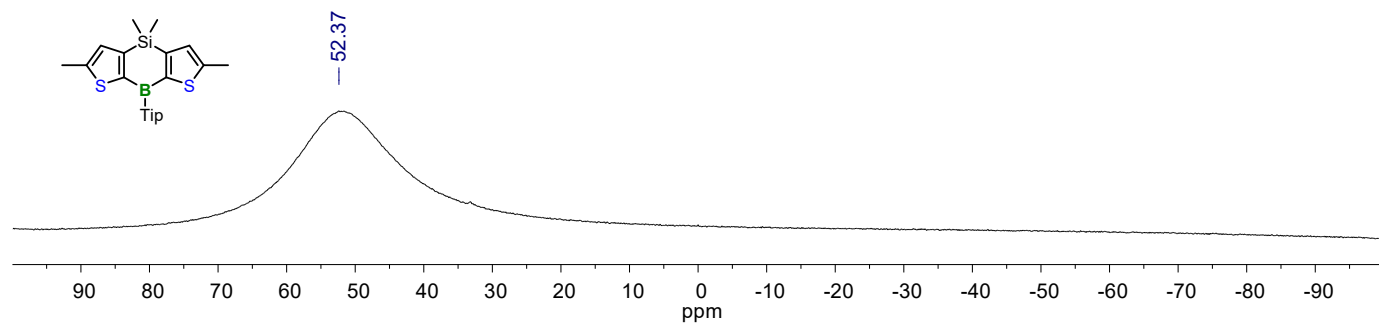

**Figure S39** <sup>11</sup>B NMR spectrum of *syn-8*<sup>Tip</sup> in CDCl<sub>3</sub> at room temperature (160 MHz).

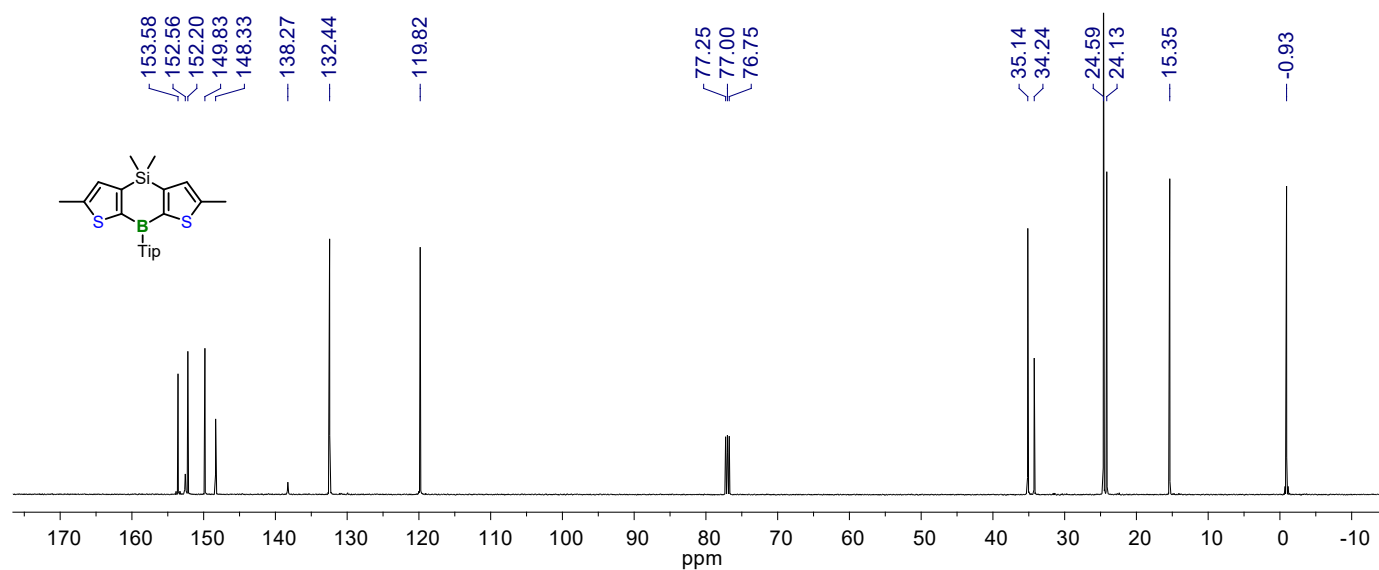

**Figure S40** <sup>13</sup>C NMR spectrum of *syn-8*<sup>Tip</sup> in CDCl<sub>3</sub> at room temperature (126 MHz).



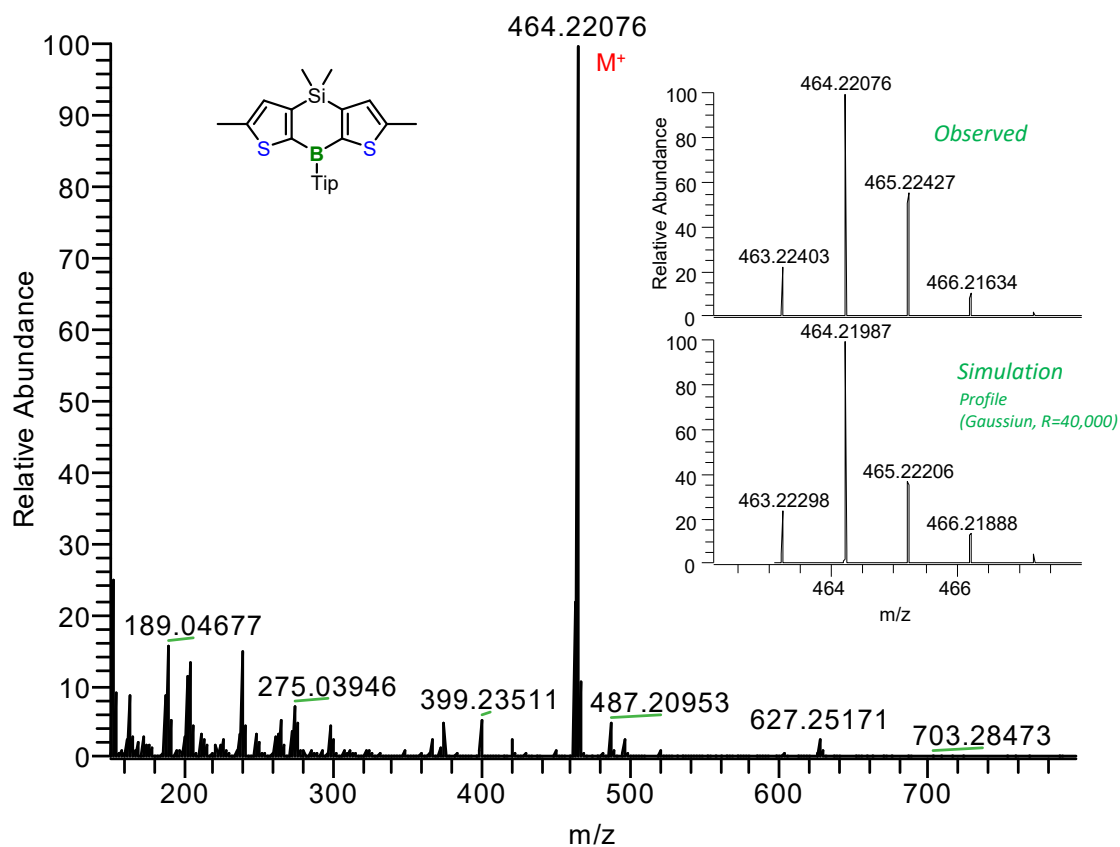

**Figure S41** High resolution APCI-mass spectrum of *syn*-**8**<sup>Tip</sup>.

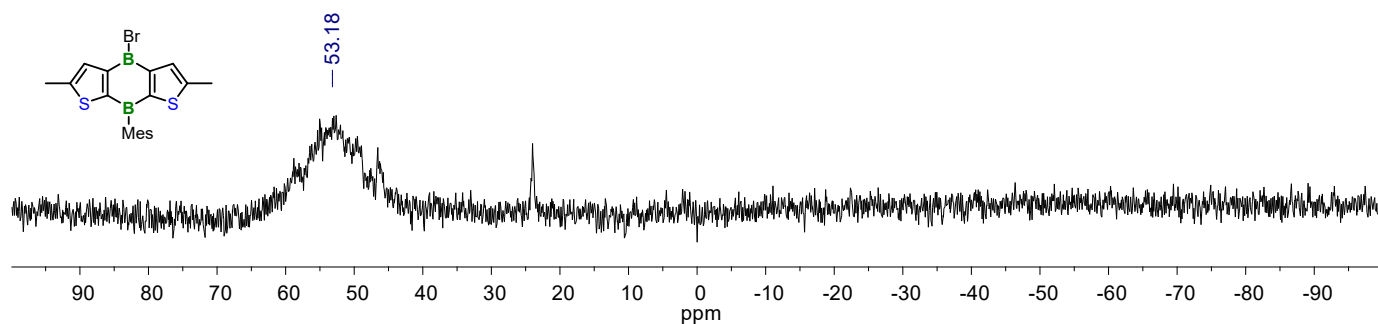

**Figure S42** <sup>11</sup>B NMR spectrum of **9**<sup>Mes</sup>-Br in CDCl<sub>3</sub> at room temperature (160 MHz).

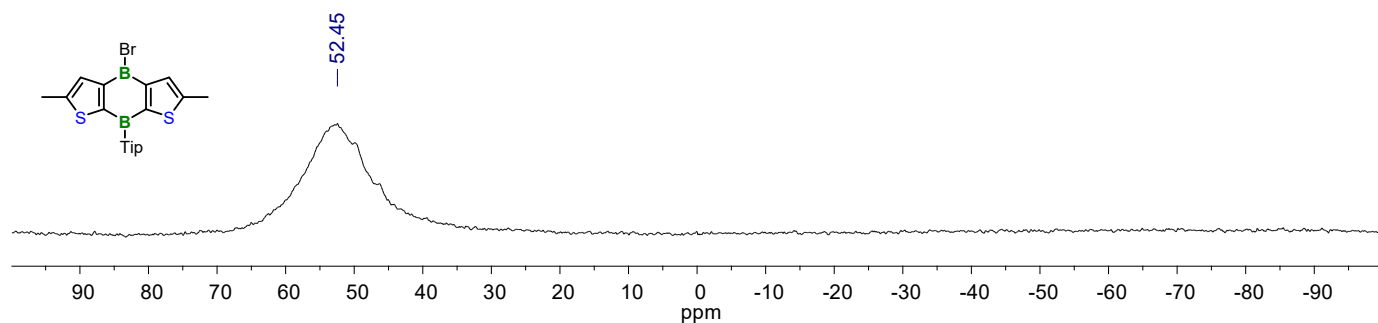

**Figure S43** <sup>11</sup>B NMR spectrum of **9**<sup>Tip</sup>-Br in CDCl<sub>3</sub> at room temperature (160 MHz).

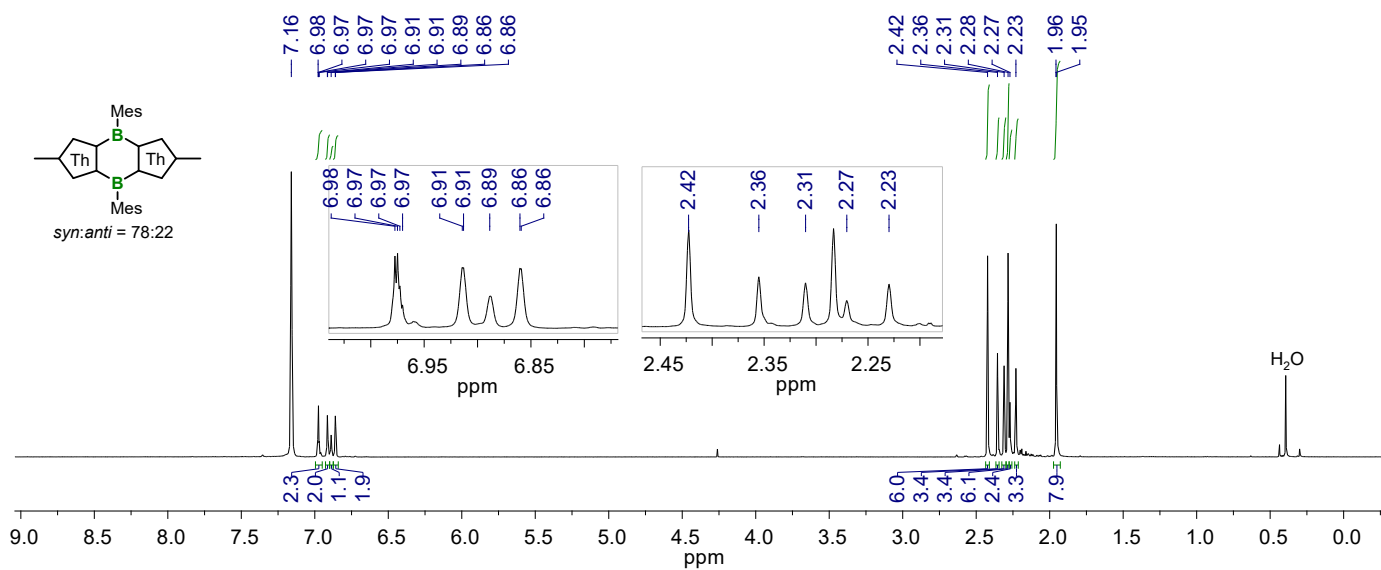

**Figure S44** <sup>1</sup>H NMR spectrum of **B-3<sup>Mes</sup>** in CDCl<sub>3</sub> at room temperature (400 MHz).

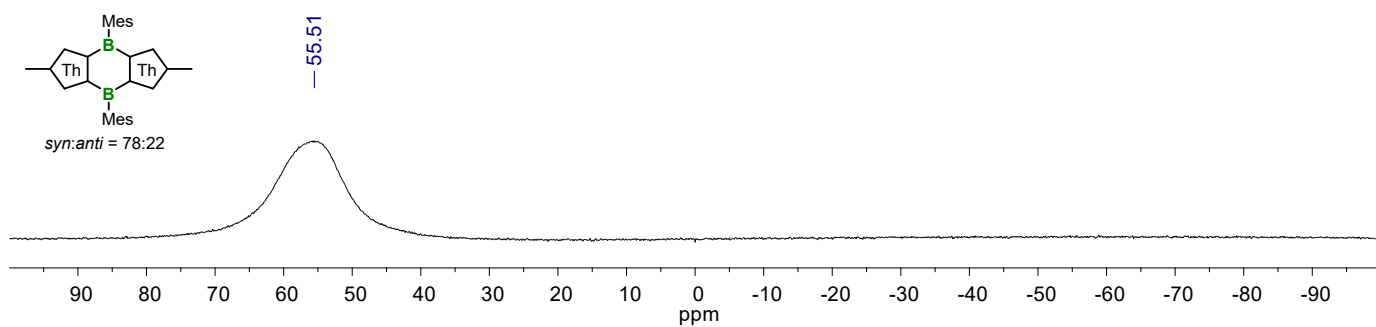

**Figure S45** <sup>11</sup>B NMR spectrum of **B-3<sup>Mes</sup>** in CDCl<sub>3</sub> at room temperature (160 MHz).

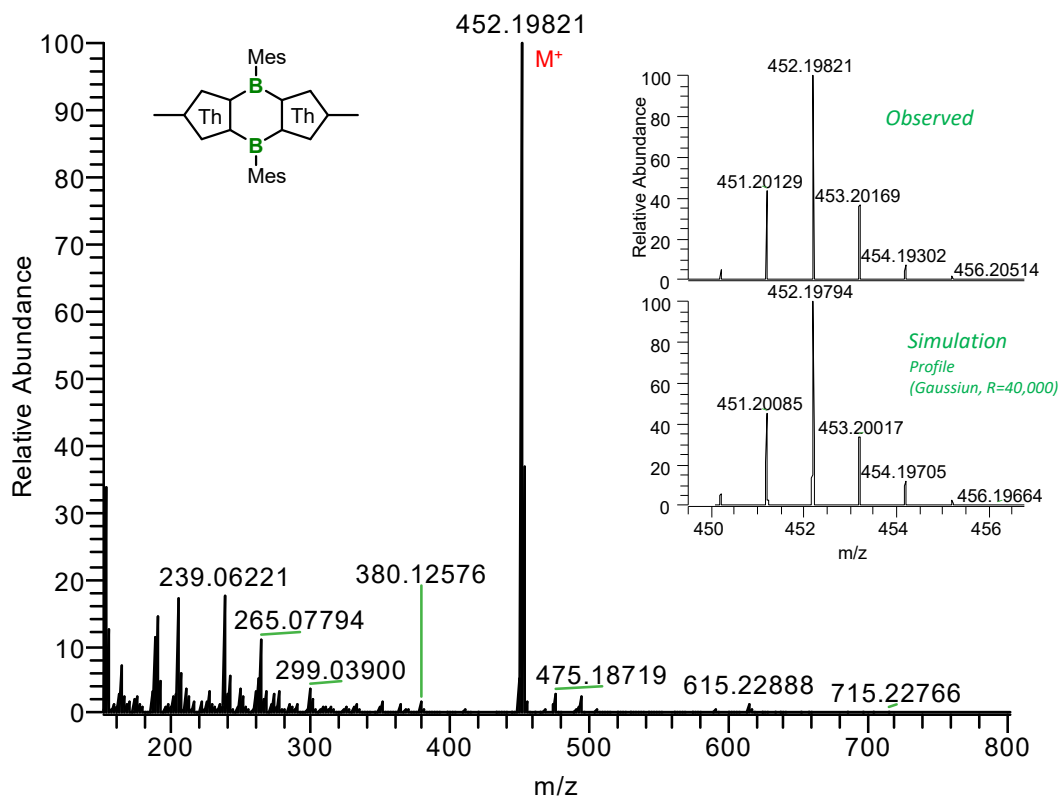

Figure S46 High resolution APCI-mass spectrum of **B-3<sup>Mes</sup>**.

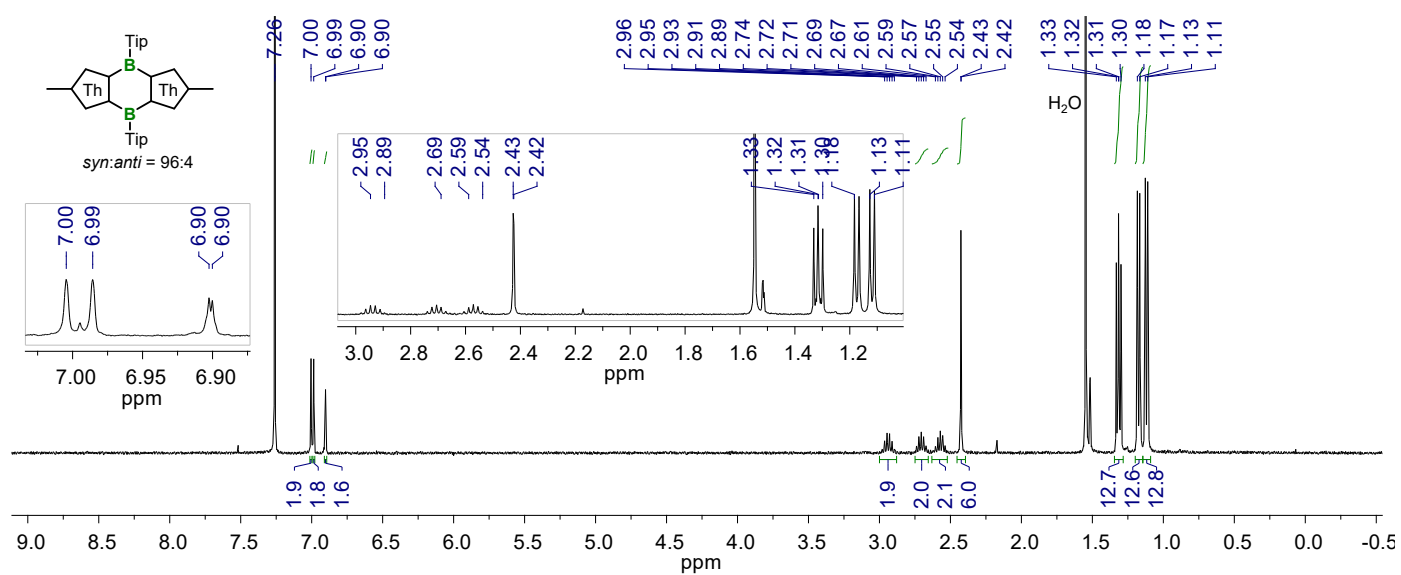

Figure S47  $^1\text{H}$  NMR spectrum of **B-3<sup>Tip</sup>** in  $\text{CDCl}_3$  at room temperature (400 MHz).

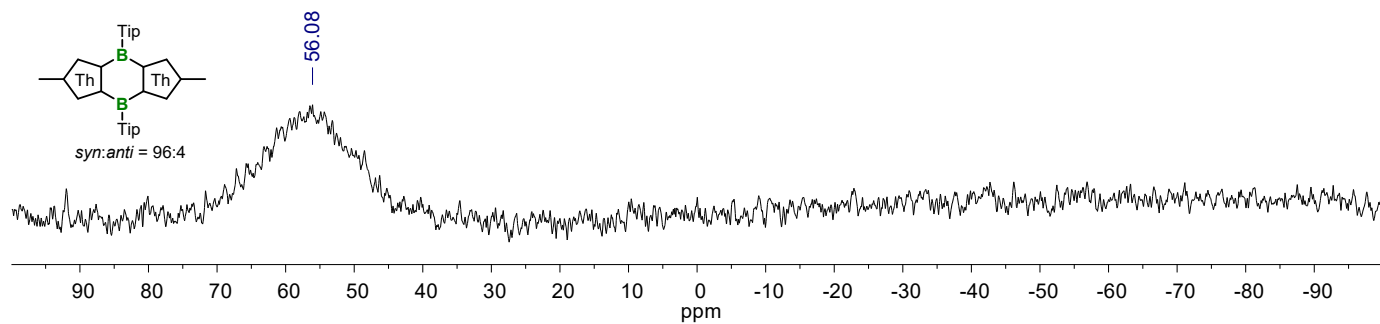

**Figure S48** <sup>11</sup>B NMR spectrum of **B-3<sup>Tip</sup>** in CDCl<sub>3</sub> at room temperature (160 MHz).

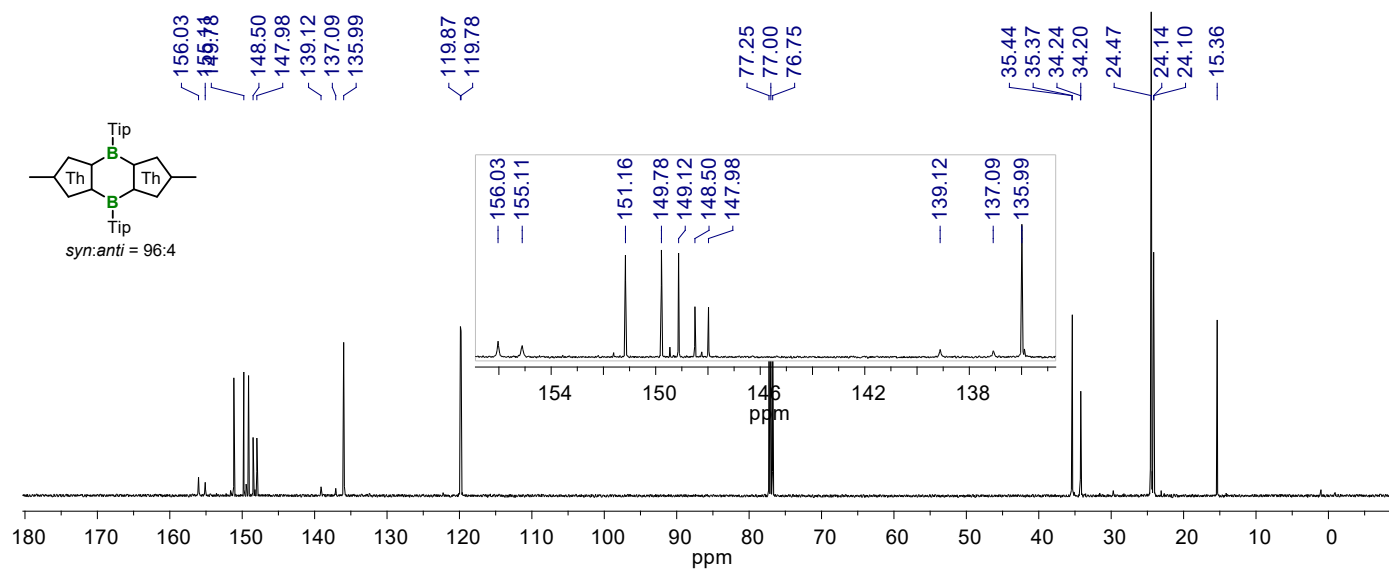

**Figure S49** <sup>13</sup>C NMR spectrum of **B-3<sup>Tip</sup>** in CDCl<sub>3</sub> at room temperature (126 MHz).

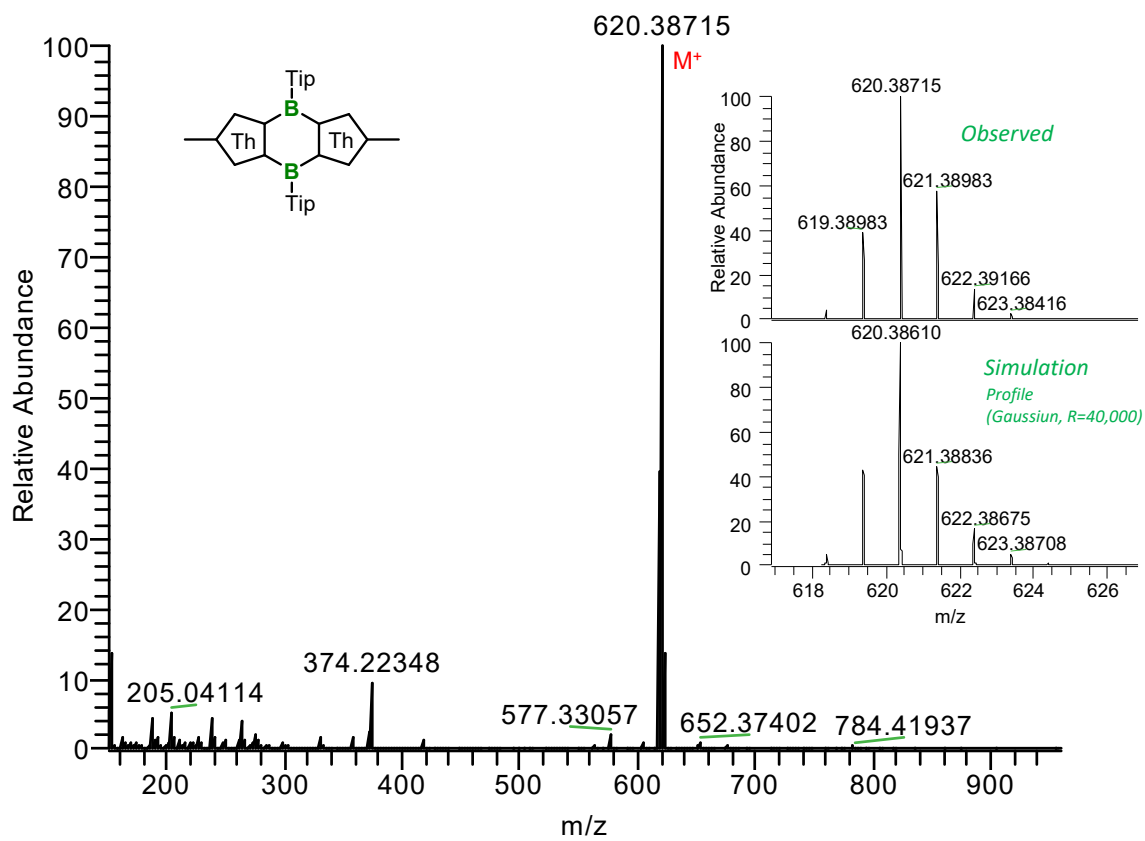

**Figure S50** High resolution APCI-mass spectrum of **B-3<sup>Tip</sup>**.

**Cartesian coordinates for optimized structures**

**Table S6** Optimized cartesian coordinates of *syn-3*<sup>Br</sup>.

| Center<br>Number | Atomic<br>Number | Atomic<br>Type | Coordinates (Angstroms) |           |           |
|------------------|------------------|----------------|-------------------------|-----------|-----------|
|                  |                  |                | X                       | Y         | Z         |
| 1                | 6                | 0              | -1.342437               | 0.781242  | -0.000314 |
| 2                | 6                | 0              | -1.308288               | -0.616025 | -0.000186 |
| 3                | 6                | 0              | 1.308292                | -0.616016 | -0.000197 |
| 4                | 6                | 0              | 1.342433                | 0.781250  | -0.000327 |
| 5                | 16               | 0              | 2.917994                | -1.269153 | -0.000045 |
| 6                | 6                | 0              | 3.644000                | 0.315523  | -0.000058 |
| 7                | 6                | 0              | 2.672523                | 1.290201  | -0.000236 |
| 8                | 16               | 0              | -2.917986               | -1.269171 | 0.000003  |
| 9                | 6                | 0              | -3.644002               | 0.315501  | -0.000022 |
| 10               | 6                | 0              | -2.672531               | 1.290185  | -0.000201 |
| 11               | 5                | 0              | 0.000004                | -1.418157 | -0.000288 |
| 12               | 5                | 0              | -0.000005               | 1.550160  | -0.000509 |
| 13               | 6                | 0              | 5.132872                | 0.495352  | 0.000130  |
| 14               | 1                | 0              | 5.597485                | 0.042163  | 0.884100  |
| 15               | 1                | 0              | 5.597835                | 0.041236  | -0.883175 |
| 16               | 1                | 0              | 5.378354                | 1.561548  | -0.000375 |
| 17               | 6                | 0              | -5.132874               | 0.495321  | 0.000112  |
| 18               | 1                | 0              | -5.597736               | 0.041687  | -0.883498 |
| 19               | 1                | 0              | -5.597584               | 0.041644  | 0.883777  |
| 20               | 1                | 0              | -5.378363               | 1.561515  | 0.000158  |
| 21               | 35               | 0              | -0.000011               | 3.480951  | -0.000545 |
| 22               | 35               | 0              | 0.000011                | -3.344409 | 0.000274  |
| 23               | 1                | 0              | 2.903488                | 2.350788  | -0.000303 |
| 24               | 1                | 0              | -2.903502               | 2.350770  | -0.000258 |

**Table S7** Optimized cartesian coordinates of *anti-3*<sup>Br</sup>.

| Center<br>Number | Atomic<br>Number | Atomic<br>Type | Coordinates (Angstroms) |           |           |
|------------------|------------------|----------------|-------------------------|-----------|-----------|
|                  |                  |                | X                       | Y         | Z         |
| 1                | 6                | 0              | 1.404982                | 0.454546  | -0.000296 |
| 2                | 6                | 0              | 1.203123                | -0.928592 | -0.000066 |
| 3                | 16               | 0              | 3.103448                | 0.825329  | 0.000180  |
| 4                | 6                | 0              | 3.549422                | -0.858368 | 0.000155  |
| 5                | 6                | 0              | 2.426641                | -1.655473 | 0.000101  |
| 6                | 5                | 0              | 0.251473                | 1.462658  | -0.000801 |
| 7                | 5                | 0              | -0.251473               | -1.462658 | -0.000123 |
| 8                | 6                | 0              | -1.404982               | -0.454546 | -0.000286 |
| 9                | 6                | 0              | -1.203122               | 0.928592  | -0.000508 |
| 10               | 16               | 0              | -3.103447               | -0.825329 | -0.000478 |
| 11               | 6                | 0              | -2.426641               | 1.655473  | -0.000324 |
| 12               | 6                | 0              | -3.549422               | 0.858368  | -0.000125 |
| 13               | 6                | 0              | 4.985888                | -1.289377 | 0.000348  |
| 14               | 1                | 0              | 5.521215                | -0.920840 | -0.882938 |
| 15               | 1                | 0              | 5.520706                | -0.921664 | 0.884289  |
| 16               | 1                | 0              | 5.046380                | -2.381766 | -0.000139 |

|    |    |   |           |           |           |
|----|----|---|-----------|-----------|-----------|
| 17 | 6  | 0 | -4.985888 | 1.289377  | 0.000143  |
| 18 | 1  | 0 | -5.521080 | 0.921385  | -0.883454 |
| 19 | 1  | 0 | -5.520841 | 0.921119  | 0.883774  |
| 20 | 1  | 0 | -5.046379 | 2.381766  | 0.000315  |
| 21 | 35 | 0 | -0.595116 | -3.360455 | -0.000419 |
| 22 | 35 | 0 | 0.595116  | 3.360454  | 0.000231  |
| 23 | 1  | 0 | -2.474982 | 2.739846  | -0.000318 |
| 24 | 1  | 0 | 2.474983  | -2.739846 | 0.000169  |

**Table S8** Optimized cartesian coordinates of *syn-1*<sup>Br</sup>.

| Center Number | Atomic Number | Atomic Type | Coordinates (Angstroms) |           |           |
|---------------|---------------|-------------|-------------------------|-----------|-----------|
|               |               |             | X                       | Y         | Z         |
| 1             | 16            | 0           | 2.881979                | 1.771554  | -0.024454 |
| 2             | 6             | 0           | 1.312631                | 1.015550  | 0.008531  |
| 3             | 6             | 0           | 1.363637                | -0.374828 | -0.030978 |
| 4             | 6             | 0           | 2.734602                | -0.852937 | -0.109545 |
| 5             | 6             | 0           | 3.673289                | 0.218553  | -0.116255 |
| 6             | 5             | 0           | 0.000031                | -1.131174 | 0.053840  |
| 7             | 6             | 0           | -3.673324               | 0.218393  | -0.116222 |
| 8             | 6             | 0           | -2.734599               | -0.853067 | -0.109549 |
| 9             | 6             | 0           | -1.363644               | -0.374911 | -0.030964 |
| 10            | 6             | 0           | -1.312700               | 1.015475  | 0.008554  |
| 11            | 16            | 0           | -2.882076               | 1.771421  | -0.024392 |
| 12            | 35            | 0           | 0.000168                | -3.046095 | 0.358751  |
| 13            | 5             | 0           | -0.000055               | 1.808059  | 0.053898  |
| 14            | 6             | 0           | -3.249114               | -2.166649 | -0.201819 |
| 15            | 6             | 0           | -5.055616               | 0.008454  | -0.196321 |
| 16            | 35            | 0           | -0.000107               | 3.727655  | 0.125756  |
| 17            | 6             | 0           | 5.055586                | 0.008647  | -0.196357 |
| 18            | 6             | 0           | 5.520523                | -1.294960 | -0.278914 |
| 19            | 6             | 0           | 4.616335                | -2.374310 | -0.284073 |
| 20            | 6             | 0           | 3.249139                | -2.166511 | -0.201762 |
| 21            | 6             | 0           | -4.616306               | -2.374481 | -0.284129 |
| 22            | 6             | 0           | -5.520523               | -1.295160 | -0.278921 |
| 23            | 1             | 0           | -2.572924               | -3.010589 | -0.205536 |
| 24            | 1             | 0           | -5.743946               | 0.848496  | -0.197433 |
| 25            | 1             | 0           | 5.743894                | 0.848707  | -0.197500 |
| 26            | 1             | 0           | 6.588454                | -1.483589 | -0.343510 |
| 27            | 1             | 0           | 4.997010                | -3.389372 | -0.354759 |
| 28            | 1             | 0           | 2.572956                | -3.010465 | -0.205435 |
| 29            | 1             | 0           | -4.996955               | -3.389551 | -0.354854 |
| 30            | 1             | 0           | -6.588450               | -1.483814 | -0.343516 |

**Table S9** Optimized cartesian coordinates of *anti-1*<sup>Br</sup>.

| Center Number | Atomic Number | Atomic Type | Coordinates (Angstroms) |           |           |
|---------------|---------------|-------------|-------------------------|-----------|-----------|
|               |               |             | X                       | Y         | Z         |
| 1             | 16            | 0           | 2.084474                | -2.429796 | 0.000032  |
| 2             | 6             | 0           | 0.936860                | -1.116311 | -0.000001 |
| 3             | 6             | 0           | 1.549026                | 0.133881  | -0.000026 |
| 4             | 6             | 0           | 2.995677                | 0.034078  | -0.000017 |

|    |    |   |           |           |           |
|----|----|---|-----------|-----------|-----------|
| 5  | 6  | 0 | 3.433657  | -1.318939 | 0.000014  |
| 6  | 5  | 0 | 0.595991  | 1.347632  | -0.000058 |
| 7  | 6  | 0 | -5.729986 | 0.644693  | 0.000027  |
| 8  | 6  | 0 | -5.322511 | -0.703454 | 0.000043  |
| 9  | 6  | 0 | -4.790408 | 1.665551  | 0.000001  |
| 10 | 6  | 0 | -3.979810 | -1.046439 | 0.000033  |
| 11 | 35 | 0 | 1.206860  | 3.179669  | 0.000027  |
| 12 | 5  | 0 | -0.595991 | -1.347632 | 0.000002  |
| 13 | 35 | 0 | -1.206860 | -3.179669 | -0.000019 |
| 14 | 6  | 0 | 4.790408  | -1.665551 | 0.000028  |
| 15 | 6  | 0 | 5.729986  | -0.644693 | 0.000010  |
| 16 | 6  | 0 | 5.322511  | 0.703454  | -0.000021 |
| 17 | 6  | 0 | 3.979810  | 1.046439  | -0.000035 |
| 18 | 16 | 0 | -2.084474 | 2.429796  | -0.000041 |
| 19 | 6  | 0 | -0.936860 | 1.116311  | -0.000034 |
| 20 | 6  | 0 | -1.549026 | -0.133881 | -0.000007 |
| 21 | 6  | 0 | -2.995677 | -0.034077 | 0.000007  |
| 22 | 6  | 0 | -3.433657 | 1.318939  | -0.000009 |
| 23 | 1  | 0 | -6.788723 | 0.888216  | 0.000035  |
| 24 | 1  | 0 | -6.073823 | -1.488148 | 0.000063  |
| 25 | 1  | 0 | -5.097568 | 2.707223  | -0.000012 |
| 26 | 1  | 0 | -3.679621 | -2.086695 | 0.000046  |
| 27 | 1  | 0 | 5.097568  | -2.707223 | 0.000052  |
| 28 | 1  | 0 | 6.788723  | -0.888216 | 0.000020  |
| 29 | 1  | 0 | 6.073823  | 1.488148  | -0.000035 |
| 30 | 1  | 0 | 3.679621  | 2.086695  | -0.000059 |

**Table S10** Optimized cartesian coordinates of *syn-3*<sup>Mes</sup>.

| Center Number | Atomic Number | Atomic Type | Coordinates (Angstroms) |           |           |
|---------------|---------------|-------------|-------------------------|-----------|-----------|
|               |               |             | X                       | Y         | Z         |
| 1             | 6             | 0           | 0.764483                | -1.326586 | -0.061543 |
| 2             | 6             | 0           | -0.629788               | -1.288833 | -0.059493 |
| 3             | 6             | 0           | -0.630154               | 1.288802  | 0.058984  |
| 4             | 6             | 0           | 0.764107                | 1.327021  | 0.060938  |
| 5             | 16            | 0           | -1.291277               | 2.896569  | 0.150045  |
| 6             | 6             | 0           | 0.290540                | 3.627242  | 0.191310  |
| 7             | 6             | 0           | 1.267993                | 2.658177  | 0.139140  |
| 8             | 16            | 0           | -1.290394               | -2.896741 | -0.151759 |
| 9             | 6             | 0           | 0.291671                | -3.626841 | -0.193869 |
| 10            | 6             | 0           | 1.268823                | -2.657518 | -0.140834 |
| 11            | 5             | 0           | -1.475393               | -0.000156 | 0.000055  |
| 12            | 5             | 0           | 1.578590                | 0.000301  | 0.000304  |
| 13            | 6             | 0           | -3.040032               | -0.000120 | 0.000509  |
| 14            | 6             | 0           | -3.753355               | 0.097537  | -1.210892 |
| 15            | 6             | 0           | -5.149938               | 0.091516  | -1.194631 |
| 16            | 6             | 0           | -5.866836               | -0.005407 | 0.001009  |
| 17            | 6             | 0           | -5.149130               | -0.105246 | 1.195945  |
| 18            | 6             | 0           | -3.752557               | -0.103237 | 1.211941  |
| 19            | 6             | 0           | 3.143932                | 0.000587  | 0.000849  |
| 20            | 6             | 0           | 3.859285                | 0.324524  | -1.170418 |
| 21            | 6             | 0           | 5.256171                | 0.311631  | -1.157292 |
| 22            | 6             | 0           | 5.974649                | -0.004627 | -0.001187 |
| 23            | 6             | 0           | 5.256641                | -0.323512 | 1.154513  |
| 24            | 6             | 0           | 3.859771                | -0.328469 | 1.170418  |
| 25            | 1             | 0           | 2.327825                | 2.894151  | 0.157878  |
| 26            | 1             | 0           | 2.328731                | -2.893133 | -0.159942 |



|    |   |   |           |           |           |
|----|---|---|-----------|-----------|-----------|
| 27 | 1 | 0 | -5.691288 | 0.162564  | -2.136269 |
| 28 | 1 | 0 | -5.689852 | -0.187499 | 2.137039  |
| 29 | 1 | 0 | 5.796706  | 0.551524  | -2.071204 |
| 30 | 1 | 0 | 5.797692  | -0.574422 | 2.065183  |
| 31 | 6 | 0 | 3.115568  | -0.668988 | 2.442583  |
| 32 | 1 | 0 | 2.459450  | 0.154129  | 2.753616  |
| 33 | 1 | 0 | 2.476100  | -1.549983 | 2.309878  |
| 34 | 1 | 0 | 3.805600  | -0.874297 | 3.266927  |
| 35 | 6 | 0 | 7.483776  | 0.023506  | 0.006475  |
| 36 | 1 | 0 | 7.862282  | 1.017259  | 0.281223  |
| 37 | 1 | 0 | 7.893789  | -0.690192 | 0.729031  |
| 38 | 1 | 0 | 7.893757  | -0.217907 | -0.979989 |
| 39 | 6 | 0 | 3.114458  | 0.659340  | -2.443758 |
| 40 | 1 | 0 | 2.455968  | -0.163739 | -2.749812 |
| 41 | 1 | 0 | 2.477312  | 1.542613  | -2.314953 |
| 42 | 1 | 0 | 3.804081  | 0.858826  | -3.269878 |
| 43 | 6 | 0 | -3.003404 | 0.199007  | -2.519874 |
| 44 | 1 | 0 | -2.354260 | 1.083341  | -2.539335 |
| 45 | 1 | 0 | -2.357311 | -0.673935 | -2.677425 |
| 46 | 1 | 0 | -3.688642 | 0.266746  | -3.370484 |
| 47 | 6 | 0 | -7.375975 | 0.024254  | 0.004071  |
| 48 | 1 | 0 | -7.753547 | 1.052001  | 0.090270  |
| 49 | 1 | 0 | -7.786470 | -0.395438 | -0.920511 |
| 50 | 1 | 0 | -7.785733 | -0.543294 | 0.846393  |
| 51 | 6 | 0 | -3.001767 | -0.211266 | 2.519912  |
| 52 | 1 | 0 | -2.354670 | -1.097156 | 2.536183  |
| 53 | 1 | 0 | -2.353507 | 0.659695  | 2.679550  |
| 54 | 1 | 0 | -3.686466 | -0.279858 | 3.370887  |
| 55 | 6 | 0 | 0.468407  | 5.112397  | 0.275145  |
| 56 | 1 | 0 | 0.016566  | 5.625222  | -0.582359 |
| 57 | 1 | 0 | 0.010974  | 5.526306  | 1.181705  |
| 58 | 1 | 0 | 1.534393  | 5.358111  | 0.292304  |
| 59 | 6 | 0 | 0.470020  | -5.111852 | -0.279179 |
| 60 | 1 | 0 | 0.018509  | -5.625650 | 0.577916  |
| 61 | 1 | 0 | 0.012531  | -5.525022 | -1.186044 |
| 62 | 1 | 0 | 1.536084  | -5.357183 | -0.296793 |

-----

**Table S11** Optimized cartesian coordinates of *syn-3*<sup>Mes</sup>•F<sup>-</sup>.

| Center<br>Number | Atomic<br>Number | Atomic<br>Type | Coordinates (Angstroms) |           |           |
|------------------|------------------|----------------|-------------------------|-----------|-----------|
|                  |                  |                | X                       | Y         | Z         |
| 1                | 6                | 0              | -0.741360               | 1.341143  | -0.304890 |
| 2                | 6                | 0              | 0.617142                | 1.330505  | -0.604974 |
| 3                | 6                | 0              | 0.598786                | -1.272993 | -0.763637 |
| 4                | 6                | 0              | -0.760998               | -1.300813 | -0.474358 |
| 5                | 16               | 0              | 1.205923                | -2.896396 | -0.942591 |
| 6                | 6                | 0              | -0.367255               | -3.622537 | -0.630454 |
| 7                | 6                | 0              | -1.288948               | -2.641648 | -0.403895 |
| 8                | 16               | 0              | 1.243586                | 2.956352  | -0.595589 |
| 9                | 6                | 0              | -0.319530               | 3.660473  | -0.196865 |
| 10               | 6                | 0              | -1.251623               | 2.670760  | -0.074870 |
| 11               | 5                | 0              | -1.517842               | 0.015348  | -0.231386 |
| 12               | 6                | 0              | 2.918292                | -0.010207 | -0.094789 |
| 13               | 6                | 0              | 4.211013                | 0.133301  | -0.661038 |
| 14               | 6                | 0              | 5.355579                | 0.088078  | 0.148413  |
| 15               | 6                | 0              | 5.287690                | -0.092992 | 1.527305  |
| 16               | 6                | 0              | 4.019713                | -0.218235 | 2.092092  |

|    |   |   |           |           |           |
|----|---|---|-----------|-----------|-----------|
| 17 | 6 | 0 | 2.857795  | -0.180435 | 1.314184  |
| 18 | 6 | 0 | -3.058343 | 0.003916  | 0.121385  |
| 19 | 6 | 0 | -4.029383 | 0.269705  | -0.864368 |
| 20 | 6 | 0 | -5.387871 | 0.257292  | -0.534033 |
| 21 | 6 | 0 | -5.820597 | -0.013253 | 0.766694  |
| 22 | 6 | 0 | -4.853014 | -0.268309 | 1.741940  |
| 23 | 6 | 0 | -3.488659 | -0.265924 | 1.436199  |
| 24 | 1 | 0 | -2.333025 | -2.854969 | -0.186016 |
| 25 | 1 | 0 | -2.290414 | 2.869247  | 0.179197  |
| 26 | 1 | 0 | 6.333295  | 0.203079  | -0.320173 |
| 27 | 1 | 0 | 3.928265  | -0.346254 | 3.170956  |
| 28 | 1 | 0 | -6.125440 | 0.464833  | -1.308927 |
| 29 | 1 | 0 | -5.168064 | -0.472400 | 2.764980  |
| 30 | 6 | 0 | -2.465022 | -0.542056 | 2.514453  |
| 31 | 1 | 0 | -1.863337 | -1.425483 | 2.270411  |
| 32 | 1 | 0 | -1.760645 | 0.292854  | 2.614630  |
| 33 | 1 | 0 | -2.940189 | -0.706555 | 3.488122  |
| 34 | 6 | 0 | -7.292737 | -0.057115 | 1.102569  |
| 35 | 1 | 0 | -7.709281 | -1.066064 | 0.971591  |
| 36 | 1 | 0 | -7.475168 | 0.233330  | 2.143784  |
| 37 | 1 | 0 | -7.870959 | 0.615630  | 0.458489  |
| 38 | 6 | 0 | -3.589954 | 0.570001  | -2.279495 |
| 39 | 1 | 0 | -2.960061 | 1.466869  | -2.314293 |
| 40 | 1 | 0 | -2.983998 | -0.248846 | -2.686443 |
| 41 | 1 | 0 | -4.447761 | 0.724383  | -2.943812 |
| 42 | 6 | 0 | 4.452062  | 0.351767  | -2.144237 |
| 43 | 1 | 0 | 4.081637  | -0.482863 | -2.744320 |
| 44 | 1 | 0 | 3.934498  | 1.240285  | -2.514713 |
| 45 | 1 | 0 | 5.526450  | 0.470162  | -2.334328 |
| 46 | 6 | 0 | 6.535945  | -0.172683 | 2.373617  |
| 47 | 1 | 0 | 6.850279  | -1.213137 | 2.542159  |
| 48 | 1 | 0 | 7.376653  | 0.344350  | 1.895836  |
| 49 | 1 | 0 | 6.381421  | 0.277877  | 3.361885  |
| 50 | 6 | 0 | 1.540513  | -0.323044 | 2.045409  |
| 51 | 1 | 0 | 0.850663  | 0.487915  | 1.795042  |
| 52 | 1 | 0 | 1.029669  | -1.254610 | 1.781034  |
| 53 | 1 | 0 | 1.698788  | -0.318263 | 3.130423  |
| 54 | 6 | 0 | -0.565234 | -5.107539 | -0.634325 |
| 55 | 1 | 0 | -0.325013 | -5.556047 | -1.608045 |
| 56 | 1 | 0 | 0.060841  | -5.611958 | 0.114300  |
| 57 | 1 | 0 | -1.611166 | -5.343516 | -0.407883 |
| 58 | 6 | 0 | -0.498339 | 5.138067  | -0.025649 |
| 59 | 1 | 0 | 0.132961  | 5.542583  | 0.777254  |
| 60 | 1 | 0 | -0.250882 | 5.694980  | -0.939730 |
| 61 | 1 | 0 | -1.541493 | 5.359157  | 0.227074  |
| 62 | 9 | 0 | 1.830185  | 0.113856  | -2.399985 |
| 63 | 5 | 0 | 1.540577  | 0.040267  | -0.993018 |

**Table S12** Optimized cartesian coordinates of *syn-3*<sup>Mes</sup>•2F<sup>-</sup>.

| Center Number | Atomic Number | Atomic Type | Coordinates (Angstroms) |           |           |
|---------------|---------------|-------------|-------------------------|-----------|-----------|
|               |               |             | X                       | Y         | Z         |
| 1             | 6             | 0           | -0.697354               | 1.326866  | 0.273226  |
| 2             | 6             | 0           | 0.524275                | 1.288841  | -0.360134 |
| 3             | 6             | 0           | 0.595371                | -1.300561 | -0.227107 |
| 4             | 6             | 0           | -0.625570               | -1.343025 | 0.406878  |
| 5             | 16            | 0           | 1.214716                | -2.947086 | -0.483935 |

|    |    |   |           |           |           |
|----|----|---|-----------|-----------|-----------|
| 6  | 6  | 0 | -0.194479 | -3.673808 | 0.265020  |
| 7  | 6  | 0 | -1.053586 | -2.690050 | 0.677694  |
| 8  | 16 | 0 | 1.064988  | 2.935499  | -0.758042 |
| 9  | 6  | 0 | -0.375777 | 3.655398  | -0.063039 |
| 10 | 6  | 0 | -1.189790 | 2.670262  | 0.428630  |
| 11 | 6  | 0 | 2.953907  | 0.042283  | -0.287794 |
| 12 | 6  | 0 | 4.077587  | -0.071323 | -1.145991 |
| 13 | 6  | 0 | 5.385833  | -0.030291 | -0.637542 |
| 14 | 6  | 0 | 5.649724  | 0.115259  | 0.721359  |
| 15 | 6  | 0 | 4.551485  | 0.223421  | 1.574884  |
| 16 | 6  | 0 | 3.235434  | 0.188494  | 1.100789  |
| 17 | 6  | 0 | -3.015379 | -0.044001 | 0.352633  |
| 18 | 6  | 0 | -3.322821 | -0.229988 | -1.025909 |
| 19 | 6  | 0 | -4.646245 | -0.244442 | -1.481177 |
| 20 | 6  | 0 | -5.729538 | -0.079845 | -0.617208 |
| 21 | 6  | 0 | -5.441270 | 0.116350  | 0.730801  |
| 22 | 6  | 0 | -4.124694 | 0.139249  | 1.218748  |
| 23 | 1  | 0 | -2.000086 | -2.917415 | 1.167861  |
| 24 | 1  | 0 | -2.147802 | 2.893205  | 0.898152  |
| 25 | 1  | 0 | 6.224084  | -0.117907 | -1.331908 |
| 26 | 1  | 0 | 4.720773  | 0.339008  | 2.647110  |
| 27 | 1  | 0 | -4.833933 | -0.385507 | -2.547406 |
| 28 | 1  | 0 | -6.266373 | 0.262515  | 1.431426  |
| 29 | 6  | 0 | -3.972819 | 0.382545  | 2.711067  |
| 30 | 1  | 0 | -3.481737 | -0.455842 | 3.210827  |
| 31 | 1  | 0 | -3.344516 | 1.252582  | 2.917684  |
| 32 | 1  | 0 | -4.960255 | 0.541670  | 3.169110  |
| 33 | 6  | 0 | -7.153110 | -0.132804 | -1.120737 |
| 34 | 1  | 0 | -7.501215 | -1.164993 | -1.284565 |
| 35 | 1  | 0 | -7.846261 | 0.329405  | -0.405853 |
| 36 | 1  | 0 | -7.264594 | 0.391576  | -2.079791 |
| 37 | 6  | 0 | -2.236320 | -0.420872 | -2.061055 |
| 38 | 1  | 0 | -1.455187 | 0.338876  | -1.979875 |
| 39 | 1  | 0 | -1.722399 | -1.377657 | -1.928555 |
| 40 | 1  | 0 | -2.659861 | -0.389176 | -3.074325 |
| 41 | 6  | 0 | 3.954331  | -0.246096 | -2.650067 |
| 42 | 1  | 0 | 3.375170  | -1.136690 | -2.906324 |
| 43 | 1  | 0 | 3.428325  | 0.591562  | -3.113963 |
| 44 | 1  | 0 | 4.953760  | -0.332309 | -3.101140 |
| 45 | 6  | 0 | 7.063611  | 0.125605  | 1.254190  |
| 46 | 1  | 0 | 7.341383  | -0.833362 | 1.719062  |
| 47 | 1  | 0 | 7.789288  | 0.316928  | 0.453159  |
| 48 | 1  | 0 | 7.203715  | 0.898844  | 2.022331  |
| 49 | 6  | 0 | 2.130849  | 0.318754  | 2.124837  |
| 50 | 1  | 0 | 1.553674  | 1.236239  | 1.978558  |
| 51 | 1  | 0 | 1.401710  | -0.491275 | 2.043662  |
| 52 | 1  | 0 | 2.546362  | 0.323096  | 3.141841  |
| 53 | 6  | 0 | -0.355003 | -5.157536 | 0.400972  |
| 54 | 1  | 0 | -0.351223 | -5.676227 | -0.570425 |
| 55 | 1  | 0 | 0.442042  | -5.618155 | 1.005526  |
| 56 | 1  | 0 | -1.311081 | -5.383849 | 0.890294  |
| 57 | 6  | 0 | -0.608886 | 5.135652  | -0.055863 |
| 58 | 1  | 0 | 0.169647  | 5.686232  | 0.495192  |
| 59 | 1  | 0 | -0.639885 | 5.566205  | -1.069000 |
| 60 | 1  | 0 | -1.570632 | 5.357153  | 0.424434  |
| 61 | 9  | 0 | 1.356583  | -0.075372 | -2.269302 |
| 62 | 5  | 0 | 1.385745  | -0.009529 | -0.816451 |
| 63 | 9  | 0 | -1.390485 | 0.055700  | 2.315037  |
| 64 | 5  | 0 | -1.434075 | -0.004134 | 0.854108  |

**Table S13** Optimized cartesian coordinates of *anti-3*<sup>Mes</sup>.

| Center Number | Atomic Number | Atomic Type | Coordinates (Angstroms) |           |           |
|---------------|---------------|-------------|-------------------------|-----------|-----------|
|               |               |             | X                       | Y         | Z         |
| 1             | 6             | 0           | -0.702976               | -1.279666 | -0.000656 |
| 2             | 6             | 0           | 0.690734                | -1.338828 | 0.002800  |
| 3             | 16            | 0           | -1.385224               | -2.882492 | 0.012759  |
| 4             | 6             | 0           | 0.185602                | -3.634647 | 0.017726  |
| 5             | 6             | 0           | 1.177243                | -2.677520 | 0.010754  |
| 6             | 5             | 0           | -1.526608               | 0.021638  | -0.002736 |
| 7             | 6             | 0           | -3.091714               | 0.033094  | -0.007498 |
| 8             | 6             | 0           | -3.805947               | 0.183985  | 1.198085  |
| 9             | 6             | 0           | -5.202461               | 0.202870  | 1.179463  |
| 10            | 6             | 0           | -5.919567               | 0.077029  | -0.013480 |
| 11            | 6             | 0           | -5.201324               | -0.063743 | -1.203936 |
| 12            | 6             | 0           | -3.804727               | -0.091019 | -1.216645 |
| 13            | 1             | 0           | 2.233772                | -2.928261 | 0.011475  |
| 14            | 1             | 0           | -5.743628               | 0.319193  | 2.116783  |
| 15            | 1             | 0           | -5.741647               | -0.152481 | -2.144720 |
| 16            | 6             | 0           | -3.056131               | 0.317295  | 2.504461  |
| 17            | 1             | 0           | -2.438885               | -0.568704 | 2.700891  |
| 18            | 1             | 0           | -2.377663               | 1.179506  | 2.489550  |
| 19            | 1             | 0           | -3.740399               | 0.441838  | 3.349475  |
| 20            | 6             | 0           | -7.428979               | 0.067537  | -0.012960 |
| 21            | 1             | 0           | -7.820334               | -0.951898 | 0.104482  |
| 22            | 1             | 0           | -7.832962               | 0.666358  | 0.810345  |
| 23            | 1             | 0           | -7.832310               | 0.463332  | -0.951150 |
| 24            | 6             | 0           | -3.055235               | -0.240768 | -2.521606 |
| 25            | 1             | 0           | -2.347839               | 0.584717  | -2.672809 |
| 26            | 1             | 0           | -2.469962               | -1.168314 | -2.540864 |
| 27            | 1             | 0           | -3.738223               | -0.257340 | -3.376620 |
| 28            | 5             | 0           | 1.526610                | -0.021607 | -0.002803 |
| 29            | 6             | 0           | 0.702974                | 1.279701  | -0.000060 |
| 30            | 6             | 0           | 3.091716                | -0.033071 | -0.007547 |
| 31            | 6             | 0           | -0.690739               | 1.338862  | 0.003436  |
| 32            | 16            | 0           | 1.385218                | 2.882524  | 0.013750  |
| 33            | 6             | 0           | 3.805896                | -0.184981 | 1.197947  |
| 34            | 6             | 0           | 3.804781                | 0.092011  | -1.216561 |
| 35            | 6             | 0           | -1.177248               | 2.677552  | 0.011660  |
| 36            | 6             | 0           | -0.185609               | 3.634679  | 0.018830  |
| 37            | 6             | 0           | 5.202411                | -0.203843 | 1.179364  |
| 38            | 6             | 0           | 3.056022                | -0.319929 | 2.504123  |
| 39            | 6             | 0           | 5.201373                | 0.064672  | -1.203821 |
| 40            | 6             | 0           | 3.055372                | 0.243306  | -2.521396 |
| 41            | 1             | 0           | -2.233775               | 2.928299  | 0.012525  |
| 42            | 6             | 0           | 5.919564                | -0.077059 | -0.013448 |
| 43            | 1             | 0           | 5.743550                | -0.320897 | 2.116608  |
| 44            | 1             | 0           | 2.435227                | 0.563815  | 2.699457  |
| 45            | 1             | 0           | 2.380938                | -1.184811 | 2.489733  |
| 46            | 1             | 0           | 3.740401                | -0.441042 | 3.349545  |
| 47            | 1             | 0           | 5.741743                | 0.154132  | -2.144511 |
| 48            | 1             | 0           | 2.345059                | -0.579807 | -2.671757 |
| 49            | 1             | 0           | 2.473349                | 1.172892  | -2.541193 |
| 50            | 1             | 0           | 3.738148                | 0.256875  | -3.376637 |
| 51            | 6             | 0           | 7.428979                | -0.067584 | -0.012885 |
| 52            | 1             | 0           | 7.820343                | 0.951877  | 0.104305  |
| 53            | 1             | 0           | 7.832931                | -0.666216 | 0.810568  |
| 54            | 1             | 0           | 7.832332                | -0.463605 | -0.950974 |
| 55            | 6             | 0           | 0.344594                | -5.124296 | 0.029012  |

|    |   |   |           |           |           |
|----|---|---|-----------|-----------|-----------|
| 56 | 1 | 0 | -0.115547 | -5.575441 | 0.916210  |
| 57 | 1 | 0 | -0.116716 | -5.588977 | -0.850552 |
| 58 | 1 | 0 | 1.407277  | -5.384319 | 0.030277  |
| 59 | 6 | 0 | -0.344609 | 5.124325  | 0.030344  |
| 60 | 1 | 0 | 0.116365  | 5.575441  | 0.917119  |
| 61 | 1 | 0 | 0.115861  | 5.589049  | -0.849642 |
| 62 | 1 | 0 | -1.407294 | 5.384332  | 0.032612  |

**Table S14** Optimized cartesian coordinates of *anti-3*<sup>Mes</sup>•F<sup>-</sup>.

| Center Number | Atomic Number | Atomic Type | Coordinates (Angstroms) |           |           |
|---------------|---------------|-------------|-------------------------|-----------|-----------|
|               |               |             | X                       | Y         | Z         |
| 1             | 6             | 0           | -0.652911               | -1.269874 | -0.382096 |
| 2             | 6             | 0           | 0.698808                | -1.320434 | -0.694130 |
| 3             | 16            | 0           | -1.309980               | -2.897013 | -0.125334 |
| 4             | 6             | 0           | 0.242882                | -3.624722 | -0.442695 |
| 5             | 6             | 0           | 1.184173                | -2.662433 | -0.720791 |
| 6             | 5             | 0           | -1.470613               | 0.011702  | -0.243768 |
| 7             | 6             | 0           | -3.006213               | -0.012227 | 0.120330  |
| 8             | 6             | 0           | -3.424070               | 0.112042  | 1.460260  |
| 9             | 6             | 0           | -4.786638               | 0.106216  | 1.772865  |
| 10            | 6             | 0           | -5.762446               | -0.022571 | 0.781144  |
| 11            | 6             | 0           | -5.341474               | -0.140156 | -0.546020 |
| 12            | 6             | 0           | -3.985219               | -0.138969 | -0.884599 |
| 13            | 1             | 0           | 2.221590                | -2.911463 | -0.930104 |
| 14            | 1             | 0           | -5.093782               | 0.205162  | 2.813662  |
| 15            | 1             | 0           | -6.086573               | -0.233998 | -1.335587 |
| 16            | 6             | 0           | -2.388587               | 0.250488  | 2.552958  |
| 17            | 1             | 0           | -1.729313               | -0.625634 | 2.582727  |
| 18            | 1             | 0           | -1.742612               | 1.118974  | 2.377478  |
| 19            | 1             | 0           | -2.854737               | 0.360684  | 3.538536  |
| 20            | 6             | 0           | -7.230078               | -0.062755 | 1.136505  |
| 21            | 1             | 0           | -7.574213               | -1.090236 | 1.321799  |
| 22            | 1             | 0           | -7.438627               | 0.515196  | 2.044384  |
| 23            | 1             | 0           | -7.849583               | 0.343170  | 0.328256  |
| 24            | 6             | 0           | -3.555468               | -0.268115 | -2.328018 |
| 25            | 1             | 0           | -2.932002               | 0.581817  | -2.631359 |
| 26            | 1             | 0           | -2.947088               | -1.168336 | -2.476218 |
| 27            | 1             | 0           | -4.417672               | -0.320429 | -3.002380 |
| 28            | 6             | 0           | 0.640236                | 1.322204  | -0.744768 |
| 29            | 6             | 0           | 2.955802                | 0.019279  | -0.113043 |
| 30            | 6             | 0           | -0.717981               | 1.337452  | -0.444214 |
| 31            | 16            | 0           | 1.238482                | 2.953087  | -0.877750 |
| 32            | 6             | 0           | 2.894556                | 0.167484  | 1.298336  |
| 33            | 6             | 0           | 4.245206                | -0.174110 | -0.673075 |
| 34            | 6             | 0           | -1.250265               | 2.672741  | -0.323204 |
| 35            | 6             | 0           | -0.333891               | 3.663804  | -0.525959 |
| 36            | 6             | 0           | 4.052662                | 0.144735  | 2.083090  |
| 37            | 6             | 0           | 1.579691                | 0.347567  | 2.025947  |
| 38            | 6             | 0           | 5.386094                | -0.189722 | 0.142648  |
| 39            | 6             | 0           | 4.485447                | -0.382541 | -2.158110 |
| 40            | 1             | 0           | -2.292708               | 2.874345  | -0.087289 |
| 41            | 6             | 0           | 5.317890                | -0.024731 | 1.523795  |
| 42            | 1             | 0           | 3.959914                | 0.258729  | 3.163477  |
| 43            | 1             | 0           | 1.122569                | 1.317284  | 1.803138  |
| 44            | 1             | 0           | 0.849922                | -0.412168 | 1.733418  |
| 45            | 1             | 0           | 1.727407                | 0.283813  | 3.110709  |

|    |   |   |           |           |           |
|----|---|---|-----------|-----------|-----------|
| 46 | 1 | 0 | 6.360916  | -0.339856 | -0.322328 |
| 47 | 1 | 0 | 3.915872  | -1.229074 | -2.550472 |
| 48 | 1 | 0 | 4.172709  | 0.483776  | -2.745987 |
| 49 | 1 | 0 | 5.552010  | -0.564766 | -2.342298 |
| 50 | 6 | 0 | 6.563401  | -0.009296 | 2.377732  |
| 51 | 1 | 0 | 6.927687  | 1.013823  | 2.551795  |
| 52 | 1 | 0 | 6.380888  | -0.454813 | 3.363502  |
| 53 | 1 | 0 | 7.380913  | -0.565318 | 1.903267  |
| 54 | 6 | 0 | 0.442439  | -5.109345 | -0.389329 |
| 55 | 1 | 0 | 0.194145  | -5.522515 | 0.597222  |
| 56 | 1 | 0 | -0.180196 | -5.635275 | -1.125328 |
| 57 | 1 | 0 | 1.489415  | -5.351306 | -0.600972 |
| 58 | 6 | 0 | -0.536668 | 5.147368  | -0.478853 |
| 59 | 1 | 0 | 0.094525  | 5.629124  | 0.280395  |
| 60 | 1 | 0 | -0.306738 | 5.628764  | -1.439311 |
| 61 | 1 | 0 | -1.581253 | 5.372133  | -0.235371 |
| 62 | 9 | 0 | 1.884974  | 0.013505  | -2.430356 |
| 63 | 5 | 0 | 1.580922  | 0.016976  | -1.021522 |

Table S15 Optimized cartesian coordinates of *anti-3*<sup>Mes</sup>•2F<sup>-</sup>.

| Center Number | Atomic Number | Atomic Type | Coordinates (Angstroms) |           |           |
|---------------|---------------|-------------|-------------------------|-----------|-----------|
|               |               |             | X                       | Y         | Z         |
| 1             | 6             | 0           | -0.542766               | 1.308393  | -0.353451 |
| 2             | 6             | 0           | 0.676742                | 1.322026  | 0.284724  |
| 3             | 16            | 0           | -1.063431               | 2.968550  | -0.718825 |
| 4             | 6             | 0           | 0.380675                | 3.659875  | -0.001325 |
| 5             | 6             | 0           | 1.183074                | 2.656252  | 0.471566  |
| 6             | 6             | 0           | -2.981707               | 0.070319  | -0.321773 |
| 7             | 6             | 0           | -4.097914               | -0.090103 | -1.183230 |
| 8             | 6             | 0           | -5.409711               | -0.081626 | -0.682750 |
| 9             | 6             | 0           | -5.685650               | 0.079225  | 0.672416  |
| 10            | 6             | 0           | -4.595147               | 0.223071  | 1.530576  |
| 11            | 6             | 0           | -3.275733               | 0.220942  | 1.063665  |
| 12            | 1             | 0           | 2.141526                | 2.858811  | 0.949189  |
| 13            | 1             | 0           | -6.240971               | -0.208952 | -1.379595 |
| 14            | 1             | 0           | -4.773455               | 0.337448  | 2.601505  |
| 15            | 6             | 0           | -3.959870               | -0.289291 | -2.683221 |
| 16            | 1             | 0           | -3.469689               | 0.562410  | -3.160663 |
| 17            | 1             | 0           | -3.338274               | -1.155941 | -2.922111 |
| 18            | 1             | 0           | -4.952074               | -0.429351 | -3.136938 |
| 19            | 6             | 0           | -7.104690               | 0.118982  | 1.189707  |
| 20            | 1             | 0           | -7.456031               | 1.147578  | 1.368110  |
| 21            | 1             | 0           | -7.802393               | -0.338575 | 0.476228  |
| 22            | 1             | 0           | -7.204065               | -0.416708 | 2.143767  |
| 23            | 6             | 0           | -2.180651               | 0.382694  | 2.094038  |
| 24            | 1             | 0           | -1.414251               | -0.390901 | 2.002577  |
| 25            | 1             | 0           | -1.648828               | 1.330257  | 1.967206  |
| 26            | 1             | 0           | -2.599485               | 0.350070  | 3.109260  |
| 27            | 6             | 0           | 0.542750                | -1.308373 | 0.353202  |
| 28            | 6             | 0           | 2.981670                | -0.070278 | 0.321857  |
| 29            | 6             | 0           | -0.676785               | -1.322005 | -0.284923 |
| 30            | 16            | 0           | 1.063446                | -2.968533 | 0.718528  |
| 31            | 6             | 0           | 3.275869                | -0.220854 | -1.063561 |
| 32            | 6             | 0           | 4.097779                | 0.090031  | 1.183459  |
| 33            | 6             | 0           | -1.183082               | -2.656233 | -0.471809 |
| 34            | 6             | 0           | -0.380648               | -3.659862 | 0.001019  |

|    |   |   |           |           |           |
|----|---|---|-----------|-----------|-----------|
| 35 | 6 | 0 | 4.595341  | -0.222946 | -1.530299 |
| 36 | 6 | 0 | 2.180955  | -0.382721 | -2.094087 |
| 37 | 6 | 0 | 5.409640  | 0.081552  | 0.683149  |
| 38 | 6 | 0 | 3.959542  | 0.289084  | 2.683450  |
| 39 | 1 | 0 | -2.141551 | -2.858811 | -0.949392 |
| 40 | 6 | 0 | 5.685742  | -0.079182 | -0.671994 |
| 41 | 1 | 0 | 4.773787  | -0.337228 | -2.601216 |
| 42 | 1 | 0 | 1.649615  | -1.330624 | -1.967654 |
| 43 | 1 | 0 | 1.414157  | 0.390450  | -2.002438 |
| 44 | 1 | 0 | 2.599878  | -0.349551 | -3.109249 |
| 45 | 1 | 0 | 6.240813  | 0.208756  | 1.380120  |
| 46 | 1 | 0 | 3.338287  | 1.155995  | 2.922316  |
| 47 | 1 | 0 | 3.468879  | -0.562443 | 3.160689  |
| 48 | 1 | 0 | 4.951719  | 0.428680  | 3.137370  |
| 49 | 6 | 0 | 7.104842  | -0.118940 | -1.189120 |
| 50 | 1 | 0 | 7.456261  | -1.147543 | -1.367332 |
| 51 | 1 | 0 | 7.204284  | 0.416614  | -2.143248 |
| 52 | 1 | 0 | 7.802445  | 0.338760  | -0.475636 |
| 53 | 6 | 0 | 0.628372  | 5.137180  | 0.038922  |
| 54 | 1 | 0 | 0.668186  | 5.589164  | -0.964546 |
| 55 | 1 | 0 | -0.147182 | 5.683557  | 0.598367  |
| 56 | 1 | 0 | 1.590062  | 5.338819  | 0.527995  |
| 57 | 6 | 0 | -0.628286 | -5.137172 | -0.039359 |
| 58 | 1 | 0 | 0.147228  | -5.683453 | -0.598955 |
| 59 | 1 | 0 | -0.667964 | -5.589273 | 0.964062  |
| 60 | 1 | 0 | -1.590022 | -5.338800 | -0.528345 |
| 61 | 9 | 0 | 1.371860  | 0.001346  | 2.296507  |
| 62 | 5 | 0 | 1.407846  | -0.024190 | 0.838469  |
| 63 | 9 | 0 | -1.372177 | -0.001320 | -2.296631 |
| 64 | 5 | 0 | -1.407926 | 0.024198  | -0.838602 |

Table S16 Optimized cartesian coordinates of *anti-1*<sup>Mes</sup>.

| Center Number | Atomic Number | Atomic Type | Coordinates (Angstroms) |           |           |
|---------------|---------------|-------------|-------------------------|-----------|-----------|
|               |               |             | X                       | Y         | Z         |
| 1             | 6             | 0           | 3.712363                | -0.768727 | 1.215910  |
| 2             | 6             | 0           | 3.017172                | -0.617117 | 0.000025  |
| 3             | 6             | 0           | 3.712330                | -0.769137 | -1.215831 |
| 4             | 6             | 0           | 5.076414                | -1.068395 | -1.199673 |
| 5             | 6             | 0           | 5.776389                | -1.225374 | 0.000090  |
| 6             | 6             | 0           | 5.076447                | -1.068002 | 1.199815  |
| 7             | 6             | 0           | -0.951125               | -1.193930 | 0.000130  |
| 8             | 6             | 0           | 0.422417                | -1.386270 | 0.000099  |
| 9             | 6             | 0           | -0.422412               | 1.386292  | -0.000116 |
| 10            | 6             | 0           | 0.951131                | 1.193952  | -0.000136 |
| 11            | 5             | 0           | 1.493687                | -0.260095 | -0.000007 |
| 12            | 5             | 0           | -1.493682               | 0.260116  | 0.000006  |
| 13            | 6             | 0           | -5.076239               | 1.069220  | 1.199663  |
| 14            | 6             | 0           | -5.776391               | 1.225363  | -0.000104 |
| 15            | 6             | 0           | -5.076625               | 1.067160  | -1.199825 |
| 16            | 6             | 0           | -3.712545               | 0.767868  | -1.215911 |
| 17            | 6             | 0           | -3.017169               | 0.617133  | -0.000023 |
| 18            | 6             | 0           | -3.712147               | 0.769997  | 1.215829  |
| 19            | 6             | 0           | -1.680773               | -2.441929 | 0.000298  |
| 20            | 6             | 0           | -0.812535               | -3.570145 | 0.000348  |
| 21            | 16            | 0           | 0.867066                | -3.077517 | 0.000243  |
| 22            | 6             | 0           | 1.680777                | 2.441951  | -0.000269 |

|    |    |   |           |           |           |
|----|----|---|-----------|-----------|-----------|
| 23 | 6  | 0 | 0.812540  | 3.570167  | -0.000377 |
| 24 | 16 | 0 | -0.867062 | 3.077538  | -0.000336 |
| 25 | 6  | 0 | 3.073184  | 2.669419  | -0.000294 |
| 26 | 6  | 0 | 3.555246  | 3.968624  | -0.000417 |
| 27 | 6  | 0 | 2.677131  | 5.069888  | -0.000526 |
| 28 | 6  | 0 | 1.302064  | 4.881019  | -0.000509 |
| 29 | 6  | 0 | -3.073180 | -2.669397 | 0.000411  |
| 30 | 6  | 0 | -3.555242 | -3.968603 | 0.000543  |
| 31 | 6  | 0 | -2.677126 | -5.069866 | 0.000574  |
| 32 | 6  | 0 | -1.302059 | -4.880998 | 0.000480  |
| 33 | 1  | 0 | 3.754810  | 1.827084  | -0.000215 |
| 34 | 1  | 0 | 4.627471  | 4.142009  | -0.000430 |
| 35 | 1  | 0 | 3.079822  | 6.078686  | -0.000622 |
| 36 | 1  | 0 | 0.622700  | 5.727996  | -0.000598 |
| 37 | 1  | 0 | -3.754806 | -1.827063 | 0.000405  |
| 38 | 1  | 0 | -4.627466 | -4.141988 | 0.000631  |
| 39 | 1  | 0 | -3.079817 | -6.078665 | 0.000682  |
| 40 | 1  | 0 | -0.622697 | -5.727975 | 0.000511  |
| 41 | 1  | 0 | -5.606260 | 1.176912  | -2.144315 |
| 42 | 1  | 0 | -5.605590 | 1.180559  | 2.144126  |
| 43 | 1  | 0 | 5.605957  | -1.178380 | 2.144301  |
| 44 | 1  | 0 | 5.605894  | -1.179084 | -2.144141 |
| 45 | 6  | 0 | 2.980270  | -0.581725 | -2.524846 |
| 46 | 1  | 0 | 3.642224  | -0.737868 | -3.382078 |
| 47 | 1  | 0 | 2.141198  | -1.282834 | -2.616666 |
| 48 | 1  | 0 | 2.563227  | 0.430734  | -2.603157 |
| 49 | 6  | 0 | 2.980390  | -0.580689 | 2.524885  |
| 50 | 1  | 0 | 3.642150  | -0.737447 | 3.382157  |
| 51 | 1  | 0 | 2.564279  | 0.432153  | 2.603188  |
| 52 | 1  | 0 | 2.140674  | -1.281031 | 2.616650  |
| 53 | 6  | 0 | 7.243132  | -1.581205 | 0.000111  |
| 54 | 1  | 0 | 7.387471  | -2.669857 | -0.000539 |
| 55 | 1  | 0 | 7.750938  | -1.186319 | -0.886232 |
| 56 | 1  | 0 | 7.750647  | -1.187389 | 0.887090  |
| 57 | 6  | 0 | -2.980765 | 0.578886  | -2.524854 |
| 58 | 1  | 0 | -3.642533 | 0.735491  | -3.382146 |
| 59 | 1  | 0 | -2.140756 | 1.278820  | -2.617041 |
| 60 | 1  | 0 | -2.565089 | -0.434176 | -2.602676 |
| 61 | 6  | 0 | -2.979927 | 0.583388  | 2.524873  |
| 62 | 1  | 0 | -2.563268 | -0.429170 | 2.603945  |
| 63 | 1  | 0 | -2.140571 | 1.284244  | 2.615981  |
| 64 | 1  | 0 | -3.641672 | 0.740480  | 3.382096  |
| 65 | 6  | 0 | -7.243132 | 1.581199  | -0.000174 |
| 66 | 1  | 0 | -7.387467 | 2.669851  | -0.001415 |
| 67 | 1  | 0 | -7.751006 | 1.185818  | -0.886256 |
| 68 | 1  | 0 | -7.750583 | 1.187882  | 0.887065  |

Table S17 Optimized cartesian coordinates of *anti-1*<sup>Mes</sup>•F<sup>-</sup>.

| Center Number | Atomic Number | Atomic Type | Coordinates (Angstroms) |           |           |
|---------------|---------------|-------------|-------------------------|-----------|-----------|
|               |               |             | X                       | Y         | Z         |
| 1             | 6             | 0           | -4.107740               | -1.078757 | -0.584070 |
| 2             | 6             | 0           | -2.883916               | -0.648688 | -0.010291 |
| 3             | 6             | 0           | -2.844322               | -0.550116 | 1.405611  |
| 4             | 6             | 0           | -3.966536               | -0.846004 | 2.185275  |
| 5             | 6             | 0           | -5.172146               | -1.252325 | 1.615125  |
| 6             | 6             | 0           | -5.216293               | -1.361569 | 0.227982  |



|    |    |   |           |           |           |
|----|----|---|-----------|-----------|-----------|
| 7  | 6  | 0 | 0.964343  | -1.166396 | -0.387809 |
| 8  | 6  | 0 | -0.376352 | -1.391253 | -0.665748 |
| 9  | 6  | 0 | 0.384029  | 1.389438  | -0.309197 |
| 10 | 6  | 0 | -0.951708 | 1.189500  | -0.572783 |
| 11 | 5  | 0 | 1.441274  | 0.283783  | -0.196942 |
| 12 | 6  | 0 | 5.180418  | 1.253072  | -0.584334 |
| 13 | 6  | 0 | 5.619244  | 1.331877  | 0.740171  |
| 14 | 6  | 0 | 4.698226  | 1.068011  | 1.757482  |
| 15 | 6  | 0 | 3.370286  | 0.738648  | 1.472370  |
| 16 | 6  | 0 | 2.935760  | 0.663174  | 0.134580  |
| 17 | 6  | 0 | 3.858057  | 0.926225  | -0.896587 |
| 18 | 6  | 0 | 1.738235  | -2.400012 | -0.308442 |
| 19 | 6  | 0 | 0.939897  | -3.552323 | -0.537362 |
| 20 | 16 | 0 | -0.733122 | -3.098005 | -0.828951 |
| 21 | 6  | 0 | -1.692297 | 2.427598  | -0.573556 |
| 22 | 6  | 0 | -0.884133 | 3.567866  | -0.302602 |
| 23 | 16 | 0 | 0.785913  | 3.112877  | -0.047044 |
| 24 | 6  | 0 | -3.072254 | 2.615274  | -0.787658 |
| 25 | 6  | 0 | -3.612364 | 3.892177  | -0.741802 |
| 26 | 6  | 0 | -2.795161 | 5.008242  | -0.479890 |
| 27 | 6  | 0 | -1.431124 | 4.855295  | -0.257854 |
| 28 | 6  | 0 | 3.108374  | -2.591298 | -0.047959 |
| 29 | 6  | 0 | 3.641542  | -3.875825 | -0.020885 |
| 30 | 6  | 0 | 2.831850  | -4.999638 | -0.249709 |
| 31 | 6  | 0 | 1.473038  | -4.842498 | -0.509244 |
| 32 | 1  | 0 | -3.697567 | 1.748980  | -0.973839 |
| 33 | 1  | 0 | -4.677692 | 4.034655  | -0.905295 |
| 34 | 1  | 0 | -3.235222 | 6.002412  | -0.446740 |
| 35 | 1  | 0 | -0.802654 | 5.717697  | -0.051485 |
| 36 | 1  | 0 | 3.745745  | -1.732891 | 0.130044  |
| 37 | 1  | 0 | 4.701786  | -4.009921 | 0.180641  |
| 38 | 1  | 0 | 3.265211  | -5.996654 | -0.224422 |
| 39 | 1  | 0 | 0.837895  | -5.706534 | -0.686968 |
| 40 | 1  | 0 | 5.022127  | 1.117528  | 2.796436  |
| 41 | 1  | 0 | 5.884578  | 1.448668  | -1.392251 |
| 42 | 1  | 0 | -6.143792 | -1.683383 | -0.245762 |
| 43 | 1  | 0 | -3.894505 | -0.754906 | 3.269195  |
| 44 | 6  | 0 | -1.594175 | -0.115997 | 2.140391  |
| 45 | 1  | 0 | -1.702628 | -0.284923 | 3.218072  |
| 46 | 1  | 0 | -0.711491 | -0.661799 | 1.796668  |
| 47 | 1  | 0 | -1.383652 | 0.947789  | 1.986198  |
| 48 | 6  | 0 | -4.309625 | -1.262645 | -2.078040 |
| 49 | 1  | 0 | -5.317057 | -1.650911 | -2.273080 |
| 50 | 1  | 0 | -4.185115 | -0.325967 | -2.627554 |
| 51 | 1  | 0 | -3.582136 | -1.957987 | -2.504438 |
| 52 | 6  | 0 | -6.368992 | -1.592023 | 2.471155  |
| 53 | 1  | 0 | -6.280214 | -2.592915 | 2.917547  |
| 54 | 1  | 0 | -6.486217 | -0.882851 | 3.300113  |
| 55 | 1  | 0 | -7.294920 | -1.579383 | 1.884570  |
| 56 | 6  | 0 | 2.396862  | 0.434885  | 2.587539  |
| 57 | 1  | 0 | 2.859698  | 0.561737  | 3.572322  |
| 58 | 1  | 0 | 1.518928  | 1.089638  | 2.534386  |
| 59 | 1  | 0 | 2.027459  | -0.595778 | 2.515047  |
| 60 | 6  | 0 | 3.408157  | 0.827314  | -2.335545 |
| 61 | 1  | 0 | 3.060104  | -0.186902 | -2.568174 |
| 62 | 1  | 0 | 2.566136  | 1.501911  | -2.531614 |
| 63 | 1  | 0 | 4.217893  | 1.077950  | -3.029591 |
| 64 | 6  | 0 | 7.042416  | 1.720445  | 1.063826  |
| 65 | 1  | 0 | 7.151041  | 2.809686  | 1.163054  |
| 66 | 1  | 0 | 7.373848  | 1.275751  | 2.009222  |
| 67 | 1  | 0 | 7.734576  | 1.397780  | 0.277506  |

|    |   |   |           |           |           |
|----|---|---|-----------|-----------|-----------|
| 68 | 5 | 0 | -1.556326 | -0.285576 | -0.912732 |
| 69 | 9 | 0 | -1.856793 | -0.294166 | -2.320708 |

---

**Table S18** Optimized cartesian coordinates of *anti-1*<sup>Mes</sup>•2F<sup>-</sup>.

| Center Number | Atomic Number | Atomic Type | Coordinates (Angstroms) |           |           |
|---------------|---------------|-------------|-------------------------|-----------|-----------|
|               |               |             | X                       | Y         | Z         |
| 1             | 6             | 0           | 4.009691                | -0.942430 | 1.080277  |
| 2             | 6             | 0           | 2.930340                | -0.594767 | 0.227280  |
| 3             | 6             | 0           | 3.193155                | -0.632753 | -1.170232 |
| 4             | 6             | 0           | 4.458476                | -0.974085 | -1.660678 |
| 5             | 6             | 0           | 5.520428                | -1.290428 | -0.813732 |
| 6             | 6             | 0           | 5.268464                | -1.273976 | 0.555416  |
| 7             | 6             | 0           | -0.885077               | -1.220009 | -0.180741 |
| 8             | 6             | 0           | 0.349027                | -1.354043 | 0.394924  |
| 9             | 6             | 0           | -0.349033               | 1.354029  | -0.394925 |
| 10            | 6             | 0           | 0.885069                | 1.219999  | 0.180741  |
| 11            | 6             | 0           | -4.458456               | 0.974149  | 1.660710  |
| 12            | 6             | 0           | -5.520416               | 1.290479  | 0.813769  |
| 13            | 6             | 0           | -5.268473               | 1.273978  | -0.555381 |
| 14            | 6             | 0           | -4.009710               | 0.942403  | -1.080250 |
| 15            | 6             | 0           | -2.930349               | 0.594765  | -0.227258 |
| 16            | 6             | 0           | -3.193145               | 0.632791  | 1.170258  |
| 17            | 6             | 0           | -1.600216               | -2.477977 | -0.265644 |
| 18            | 6             | 0           | -0.874238               | -3.582828 | 0.268727  |
| 19            | 16            | 0           | 0.687286                | -3.053045 | 0.858366  |
| 20            | 6             | 0           | 1.600216                | 2.477963  | 0.265623  |
| 21            | 6             | 0           | 0.874244                | 3.582811  | -0.268763 |
| 22            | 16            | 0           | -0.687282               | 3.053029  | -0.858398 |
| 23            | 6             | 0           | 2.887096                | 2.724034  | 0.781863  |
| 24            | 6             | 0           | 3.417067                | 4.010269  | 0.770297  |
| 25            | 6             | 0           | 2.681157                | 5.087144  | 0.244998  |
| 26            | 6             | 0           | 1.405924                | 4.875266  | -0.277117 |
| 27            | 6             | 0           | -2.887095               | -2.724048 | -0.781884 |
| 28            | 6             | 0           | -3.417059               | -4.010285 | -0.770334 |
| 29            | 6             | 0           | -2.681142               | -5.087165 | -0.245053 |
| 30            | 6             | 0           | -1.405910               | -4.875287 | 0.277063  |
| 31            | 1             | 0           | 3.460425                | 1.891549  | 1.176382  |
| 32            | 1             | 0           | 4.414817                | 4.185393  | 1.170397  |
| 33            | 1             | 0           | 3.107456                | 6.089611  | 0.242611  |
| 34            | 1             | 0           | 0.832256                | 5.704283  | -0.687838 |
| 35            | 1             | 0           | -3.460431               | -1.891559 | -1.176386 |
| 36            | 1             | 0           | -4.414810               | -4.185409 | -1.170434 |
| 37            | 1             | 0           | -3.107435               | -6.089634 | -0.242681 |
| 38            | 1             | 0           | -0.832236               | -5.704306 | 0.687770  |
| 39            | 1             | 0           | -6.074141               | 1.534909  | -1.244211 |
| 40            | 1             | 0           | -4.615841               | 0.994148  | 2.740391  |
| 41            | 1             | 0           | 6.074125                | -1.534925 | 1.244247  |
| 42            | 1             | 0           | 4.615872                | -0.994056 | -2.740358 |
| 43            | 6             | 0           | 2.125522                | -0.305286 | -2.191265 |
| 44            | 1             | 0           | 2.466491                | -0.571927 | -3.200469 |
| 45            | 1             | 0           | 1.185708                | -0.824718 | -1.990952 |
| 46            | 1             | 0           | 1.879179                | 0.761036  | -2.183830 |
| 47            | 6             | 0           | 3.883359                | -0.991470 | 2.593422  |
| 48            | 1             | 0           | 4.828557                | -1.334839 | 3.037410  |
| 49            | 1             | 0           | 3.631333                | -0.014394 | 3.013283  |
| 50            | 1             | 0           | 3.082631                | -1.664418 | 2.909995  |

|    |   |   |           |           |           |
|----|---|---|-----------|-----------|-----------|
| 51 | 6 | 0 | 6.890629  | -1.617561 | -1.359545 |
| 52 | 1 | 0 | 6.828169  | -2.225717 | -2.271921 |
| 53 | 1 | 0 | 7.460805  | -0.712612 | -1.621035 |
| 54 | 1 | 0 | 7.489477  | -2.174123 | -0.627293 |
| 55 | 6 | 0 | -3.883406 | 0.991373  | -2.593400 |
| 56 | 1 | 0 | -4.828627 | 1.334675  | -3.037390 |
| 57 | 1 | 0 | -3.082714 | 1.664341  | -2.910021 |
| 58 | 1 | 0 | -3.631340 | 0.014287  | -3.013214 |
| 59 | 6 | 0 | -2.125501 | 0.305337  | 2.191283  |
| 60 | 1 | 0 | -1.879117 | -0.760975 | 2.183823  |
| 61 | 1 | 0 | -1.185705 | 0.824805  | 1.990978  |
| 62 | 1 | 0 | -2.466476 | 0.571944  | 3.200494  |
| 63 | 6 | 0 | -6.890606 | 1.617641  | 1.359592  |
| 64 | 1 | 0 | -6.828114 | 2.225590  | 2.272102  |
| 65 | 1 | 0 | -7.489365 | 2.174430  | 0.627438  |
| 66 | 1 | 0 | -7.460894 | 0.712697  | 1.620855  |
| 67 | 5 | 0 | 1.422349  | -0.195729 | 0.778996  |
| 68 | 9 | 0 | 1.440939  | -0.064204 | 2.227989  |
| 69 | 9 | 0 | -1.440965 | 0.064206  | -2.227983 |
| 70 | 5 | 0 | -1.422364 | 0.195720  | -0.778983 |

-----

**Table S19** Optimized cartesian coordinates of **2<sup>Mes</sup>**.

| Center<br>Number | Atomic<br>Number | Atomic<br>Type | Coordinates (Angstroms) |           |           |
|------------------|------------------|----------------|-------------------------|-----------|-----------|
|                  |                  |                | X                       | Y         | Z         |
| 1                | 6                | 0              | -0.730843               | 1.320035  | 0.000001  |
| 2                | 6                | 0              | 0.730620                | 1.320276  | -0.000016 |
| 3                | 6                | 0              | 1.264478                | 2.596660  | -0.000019 |
| 4                | 5                | 0              | -1.538675               | -0.000161 | -0.000034 |
| 5                | 6                | 0              | -3.109090               | -0.000328 | -0.000015 |
| 6                | 6                | 0              | -3.823467               | -0.003261 | -1.213059 |
| 7                | 6                | 0              | -5.220736               | -0.008908 | -1.198991 |
| 8                | 6                | 0              | -5.939522               | -0.008715 | 0.000006  |
| 9                | 6                | 0              | -5.220720               | -0.009472 | 1.198983  |
| 10               | 6                | 0              | -3.823443               | -0.003842 | 1.213033  |
| 11               | 1                | 0              | -5.761600               | -0.014889 | -2.143776 |
| 12               | 1                | 0              | -5.761570               | -0.015887 | 2.143772  |
| 13               | 6                | 0              | -3.070448               | -0.005622 | -2.524393 |
| 14               | 1                | 0              | -2.418951               | 0.873455  | -2.610906 |
| 15               | 1                | 0              | -2.419191               | -0.885123 | -2.608498 |
| 16               | 1                | 0              | -3.751738               | -0.006657 | -3.380913 |
| 17               | 6                | 0              | -7.448767               | 0.018674  | 0.000003  |
| 18               | 1                | 0              | -7.829234               | 1.048988  | -0.000807 |
| 19               | 1                | 0              | -7.858171               | -0.478203 | -0.886031 |
| 20               | 1                | 0              | -7.858140               | -0.476830 | 0.886813  |
| 21               | 6                | 0              | -3.070408               | -0.006708 | 2.524359  |
| 22               | 1                | 0              | -2.418600               | -0.885859 | 2.607808  |
| 23               | 1                | 0              | -2.419464               | 0.872718  | 2.611518  |
| 24               | 1                | 0              | -3.751691               | -0.008781 | 3.380883  |
| 25               | 5                | 0              | 1.538673                | 0.000168  | -0.000014 |
| 26               | 6                | 0              | 0.730842                | -1.320027 | 0.000007  |
| 27               | 6                | 0              | 3.109088                | 0.000332  | 0.000021  |
| 28               | 6                | 0              | -0.730621               | -1.320271 | -0.000030 |
| 29               | 6                | 0              | 3.823480                | 0.003498  | -1.213015 |
| 30               | 6                | 0              | 3.823424                | 0.003606  | 1.213078  |
| 31               | 6                | 0              | -1.264476               | -2.596657 | -0.000065 |
| 32               | 6                | 0              | 5.220748                | 0.009129  | -1.198928 |

|    |    |   |           |           |           |
|----|----|---|-----------|-----------|-----------|
| 33 | 6  | 0 | 3.070475  | 0.006044  | -2.524357 |
| 34 | 6  | 0 | 5.220702  | 0.009236  | 1.199047  |
| 35 | 6  | 0 | 3.070372  | 0.006283  | 2.524394  |
| 36 | 6  | 0 | 5.939519  | 0.008703  | 0.000079  |
| 37 | 1  | 0 | 5.761624  | 0.015285  | -2.143705 |
| 38 | 1  | 0 | 2.419331  | -0.873264 | -2.611200 |
| 39 | 1  | 0 | 2.418868  | 0.885313  | -2.608146 |
| 40 | 1  | 0 | 3.751775  | 0.007651  | -3.380868 |
| 41 | 1  | 0 | 5.761540  | 0.015473  | 2.143844  |
| 42 | 1  | 0 | 2.418822  | 0.885602  | 2.608105  |
| 43 | 1  | 0 | 2.419166  | -0.872975 | 2.611269  |
| 44 | 1  | 0 | 3.751642  | 0.007901  | 3.380929  |
| 45 | 6  | 0 | 7.448764  | -0.018694 | 0.000087  |
| 46 | 1  | 0 | 7.829225  | -1.049010 | -0.001004 |
| 47 | 1  | 0 | 7.858182  | 0.478424  | -0.885806 |
| 48 | 1  | 0 | 7.858129  | 0.476564  | 0.887037  |
| 49 | 16 | 0 | 0.000584  | -3.799722 | -0.000037 |
| 50 | 16 | 0 | -0.000577 | 3.799729  | 0.000003  |
| 51 | 6  | 0 | 1.265139  | -2.596199 | 0.000011  |
| 52 | 6  | 0 | -1.265136 | 2.596209  | 0.000018  |
| 53 | 6  | 0 | 2.692721  | -3.067258 | 0.000037  |
| 54 | 1  | 0 | 3.232378  | -2.698099 | -0.877013 |
| 55 | 1  | 0 | 3.232326  | -2.698155 | 0.877144  |
| 56 | 1  | 0 | 2.747274  | -4.160040 | 0.000006  |
| 57 | 6  | 0 | -2.691784 | -3.068538 | -0.000068 |
| 58 | 1  | 0 | -3.231608 | -2.700350 | 0.877279  |
| 59 | 1  | 0 | -3.231938 | -2.699343 | -0.876776 |
| 60 | 1  | 0 | -2.745661 | -4.161346 | -0.000667 |
| 61 | 6  | 0 | -2.692716 | 3.067275  | -0.000045 |
| 62 | 1  | 0 | -3.232057 | 2.698904  | -0.877632 |
| 63 | 1  | 0 | -3.232640 | 2.697391  | 0.876524  |
| 64 | 1  | 0 | -2.747263 | 4.160057  | 0.000849  |
| 65 | 6  | 0 | 2.691790  | 3.068531  | -0.000026 |
| 66 | 1  | 0 | 3.231803  | 2.699764  | 0.876955  |
| 67 | 1  | 0 | 3.231749  | 2.699905  | -0.877101 |
| 68 | 1  | 0 | 2.745675  | 4.161339  | 0.000057  |

-----

**Table S20** Optimized cartesian coordinates of  $2^{\text{Mes}}\cdot\text{F}^-$ .

| Center<br>Number | Atomic<br>Number | Atomic<br>Type | Coordinates (Angstroms) |           |           |
|------------------|------------------|----------------|-------------------------|-----------|-----------|
|                  |                  |                | X                       | Y         | Z         |
| 1                | 6                | 0              | -0.731692               | -1.339896 | -0.712646 |
| 2                | 6                | 0              | 0.692897                | -1.325571 | -0.394919 |
| 3                | 6                | 0              | 1.244535                | -2.599235 | -0.286381 |
| 4                | 6                | 0              | -2.970912               | 0.003923  | 0.029275  |
| 5                | 6                | 0              | -2.816645               | 0.002975  | 1.442908  |
| 6                | 6                | 0              | -3.921432               | 0.003523  | 2.299468  |
| 7                | 6                | 0              | -5.229913               | 0.002947  | 1.816061  |
| 8                | 6                | 0              | -5.394704               | 0.007473  | 0.434547  |
| 9                | 6                | 0              | -4.306591               | 0.007015  | -0.453750 |
| 10               | 1                | 0              | -3.753203               | 0.005531  | 3.376916  |
| 11               | 1                | 0              | -6.405120               | 0.012171  | 0.024772  |
| 12               | 6                | 0              | -1.449489               | 0.004836  | 2.091256  |
| 13               | 1                | 0              | -0.863629               | -0.869115 | 1.791657  |
| 14               | 1                | 0              | -0.867661               | 0.883108  | 1.796353  |
| 15               | 1                | 0              | -1.536870               | 0.001616  | 3.184350  |
| 16               | 6                | 0              | -6.413493               | -0.024011 | 2.753645  |

|    |    |   |           |           |           |
|----|----|---|-----------|-----------|-----------|
| 17 | 1  | 0 | -6.568560 | -1.021742 | 3.189410  |
| 18 | 1  | 0 | -6.281168 | 0.671189  | 3.592718  |
| 19 | 1  | 0 | -7.338944 | 0.250635  | 2.234039  |
| 20 | 6  | 0 | -4.657971 | 0.012916  | -1.931281 |
| 21 | 1  | 0 | -4.246356 | 0.884352  | -2.445621 |
| 22 | 1  | 0 | -4.250158 | -0.857033 | -2.451128 |
| 23 | 1  | 0 | -5.748498 | 0.015714  | -2.055986 |
| 24 | 5  | 0 | 1.462342  | -0.000853 | -0.213190 |
| 25 | 6  | 0 | 0.696357  | 1.326203  | -0.392288 |
| 26 | 6  | 0 | 3.001807  | -0.002770 | 0.140587  |
| 27 | 6  | 0 | -0.728171 | 1.344993  | -0.709806 |
| 28 | 6  | 0 | 3.428854  | -0.007720 | 1.482063  |
| 29 | 6  | 0 | 3.973564  | -0.005249 | -0.877917 |
| 30 | 6  | 0 | -1.208712 | 2.619492  | -0.838640 |
| 31 | 6  | 0 | 4.793710  | -0.013811 | 1.784116  |
| 32 | 6  | 0 | 2.398155  | -0.011645 | 2.587495  |
| 33 | 6  | 0 | 5.332700  | -0.011348 | -0.551656 |
| 34 | 6  | 0 | 3.530118  | -0.006723 | -2.322830 |
| 35 | 6  | 0 | 5.763811  | -0.012143 | 0.777921  |
| 36 | 1  | 0 | 5.107912  | -0.021272 | 2.827408  |
| 37 | 1  | 0 | 1.743336  | 0.865776  | 2.519675  |
| 38 | 1  | 0 | 1.741872  | -0.887401 | 2.512851  |
| 39 | 1  | 0 | 2.866502  | -0.015804 | 3.577913  |
| 40 | 1  | 0 | 6.072350  | -0.016835 | -1.351763 |
| 41 | 1  | 0 | 2.909066  | -0.883810 | -2.543268 |
| 42 | 1  | 0 | 2.909667  | 0.870446  | -2.544599 |
| 43 | 1  | 0 | 4.384483  | -0.007491 | -3.008712 |
| 44 | 6  | 0 | 7.235224  | 0.017329  | 1.117467  |
| 45 | 1  | 0 | 7.610658  | 1.046833  | 1.204152  |
| 46 | 1  | 0 | 7.435790  | -0.480100 | 2.073408  |
| 47 | 1  | 0 | 7.834408  | -0.479984 | 0.345992  |
| 48 | 16 | 0 | 0.054554  | 3.822669  | -0.574914 |
| 49 | 16 | 0 | 0.044677  | -3.819931 | -0.584103 |
| 50 | 6  | 0 | 1.251274  | 2.598145  | -0.280523 |
| 51 | 6  | 0 | -1.215471 | -2.612821 | -0.844928 |
| 52 | 6  | 0 | 2.652663  | 3.042744  | 0.043382  |
| 53 | 1  | 0 | 2.984005  | 2.665108  | 1.016133  |
| 54 | 1  | 0 | 3.376093  | 2.676624  | -0.692685 |
| 55 | 1  | 0 | 2.718614  | 4.135913  | 0.065250  |
| 56 | 6  | 0 | -2.585661 | 3.084103  | -1.213070 |
| 57 | 1  | 0 | -2.742057 | 3.028396  | -2.298344 |
| 58 | 1  | 0 | -3.334606 | 2.443656  | -0.740865 |
| 59 | 1  | 0 | -2.769467 | 4.118583  | -0.898943 |
| 60 | 6  | 0 | -2.593211 | -3.073052 | -1.221710 |
| 61 | 1  | 0 | -3.340565 | -2.426905 | -0.754915 |
| 62 | 1  | 0 | -2.746013 | -3.022112 | -2.307768 |
| 63 | 1  | 0 | -2.782752 | -4.105153 | -0.903085 |
| 64 | 6  | 0 | 2.644636  | -3.048494 | 0.036670  |
| 65 | 1  | 0 | 3.369440  | -2.682101 | -0.697877 |
| 66 | 1  | 0 | 2.976726  | -2.674954 | 1.010736  |
| 67 | 1  | 0 | 2.707673  | -4.141887 | 0.055128  |
| 68 | 9  | 0 | -2.041779 | 0.005930  | -2.348044 |
| 69 | 5  | 0 | -1.638761 | 0.004072  | -0.957556 |

Table S21 Optimized cartesian coordinates of  $2^{\text{Mes}}\cdot 2\text{F}^-$ .

| Center<br>Number | Atomic<br>Number | Atomic<br>Type | Coordinates (Angstroms) |   |   |
|------------------|------------------|----------------|-------------------------|---|---|
|                  |                  |                | X                       | Y | Z |

|    |    |   |           |           |           |
|----|----|---|-----------|-----------|-----------|
| 1  | 6  | 0 | -0.636664 | -1.343809 | -0.364006 |
| 2  | 6  | 0 | 0.629606  | -1.349673 | 0.358176  |
| 3  | 6  | 0 | 1.078130  | -2.619228 | 0.626536  |
| 4  | 6  | 0 | -2.976072 | 0.006547  | -0.215111 |
| 5  | 6  | 0 | -3.172748 | 0.003590  | 1.197091  |
| 6  | 6  | 0 | -4.455540 | 0.002977  | 1.753853  |
| 7  | 6  | 0 | -5.608044 | 0.004245  | 0.965862  |
| 8  | 6  | 0 | -5.430561 | 0.009971  | -0.413547 |
| 9  | 6  | 0 | -4.155588 | 0.010501  | -1.006147 |
| 10 | 1  | 0 | -4.555680 | 0.002541  | 2.840796  |
| 11 | 1  | 0 | -6.310890 | 0.014624  | -1.059482 |
| 12 | 6  | 0 | -2.006841 | 0.003400  | 2.159784  |
| 13 | 1  | 0 | -1.359494 | -0.864939 | 2.012649  |
| 14 | 1  | 0 | -1.361440 | 0.873660  | 2.015547  |
| 15 | 1  | 0 | -2.362520 | 0.001171  | 3.198734  |
| 16 | 6  | 0 | -6.985250 | -0.015342 | 1.586594  |
| 17 | 1  | 0 | -7.207785 | -0.976520 | 2.074960  |
| 18 | 1  | 0 | -7.098774 | 0.760602  | 2.357081  |
| 19 | 1  | 0 | -7.762924 | 0.152318  | 0.830633  |
| 20 | 6  | 0 | -4.133946 | 0.017578  | -2.525038 |
| 21 | 1  | 0 | -3.599070 | 0.883697  | -2.920208 |
| 22 | 1  | 0 | -3.618134 | -0.856913 | -2.927790 |
| 23 | 1  | 0 | -5.162364 | 0.029741  | -2.914434 |
| 24 | 6  | 0 | 0.636722  | 1.343953  | 0.363625  |
| 25 | 6  | 0 | 2.976145  | -0.006560 | 0.215160  |
| 26 | 6  | 0 | -0.629599 | 1.349738  | -0.358481 |
| 27 | 6  | 0 | 4.155504  | -0.010500 | 1.006435  |
| 28 | 6  | 0 | 3.173099  | -0.003723 | -1.197006 |
| 29 | 6  | 0 | -1.078242 | 2.619238  | -0.626845 |
| 30 | 6  | 0 | 5.430605  | -0.010094 | 0.414105  |
| 31 | 6  | 0 | 4.133499  | -0.017393 | 2.525333  |
| 32 | 6  | 0 | 4.456002  | -0.003239 | -1.753492 |
| 33 | 6  | 0 | 2.007378  | -0.003514 | -2.159921 |
| 34 | 6  | 0 | 5.608354  | -0.004514 | -0.965268 |
| 35 | 1  | 0 | 6.310790  | -0.014724 | 1.060234  |
| 36 | 1  | 0 | 3.617415  | 0.857052  | 2.927836  |
| 37 | 1  | 0 | 3.598641  | -0.883544 | 2.920465  |
| 38 | 1  | 0 | 5.161823  | -0.029351 | 2.914982  |
| 39 | 1  | 0 | 4.556378  | -0.002891 | -2.840415 |
| 40 | 1  | 0 | 1.361933  | -0.873761 | -2.015789 |
| 41 | 1  | 0 | 1.360029  | 0.864844  | -2.012893 |
| 42 | 1  | 0 | 2.363253  | -0.001297 | -3.198803 |
| 43 | 6  | 0 | 6.985673  | 0.014899  | -1.585751 |
| 44 | 1  | 0 | 7.208227  | 0.975883  | -2.074486 |
| 45 | 1  | 0 | 7.763212  | -0.152390 | -0.829571 |
| 46 | 1  | 0 | 7.099399  | -0.761368 | -2.355886 |
| 47 | 16 | 0 | 0.011756  | 3.850292  | 0.008759  |
| 48 | 16 | 0 | -0.011986 | -3.850185 | -0.009078 |
| 49 | 6  | 0 | 1.093276  | 2.609056  | 0.638701  |
| 50 | 6  | 0 | -1.093319 | -2.608851 | -0.639124 |
| 51 | 6  | 0 | 2.310930  | 3.024550  | 1.415252  |
| 52 | 1  | 0 | 2.206113  | 2.769656  | 2.478577  |
| 53 | 1  | 0 | 3.200728  | 2.501825  | 1.048679  |
| 54 | 1  | 0 | 2.494420  | 4.104469  | 1.342638  |
| 55 | 6  | 0 | -2.292996 | 3.047497  | -1.400585 |
| 56 | 1  | 0 | -2.174053 | 2.842196  | -2.473536 |
| 57 | 1  | 0 | -3.176370 | 2.494341  | -1.065629 |
| 58 | 1  | 0 | -2.496518 | 4.119974  | -1.283195 |
| 59 | 6  | 0 | -2.311141 | -3.024063 | -1.415590 |
| 60 | 1  | 0 | -3.201534 | -2.503942 | -1.046667 |

|    |   |   |           |           |           |
|----|---|---|-----------|-----------|-----------|
| 61 | 1 | 0 | -2.207672 | -2.765667 | -2.478165 |
| 62 | 1 | 0 | -2.492708 | -4.104502 | -1.346078 |
| 63 | 6 | 0 | 2.292725  | -3.047709 | 1.400378  |
| 64 | 1 | 0 | 3.175688  | -2.492935 | 1.067091  |
| 65 | 1 | 0 | 2.172870  | -2.844752 | 2.473699  |
| 66 | 1 | 0 | 2.497522  | -4.119730 | 1.280989  |
| 67 | 9 | 0 | -1.493345 | 0.009032  | -2.296955 |
| 68 | 5 | 0 | -1.430545 | 0.006074  | -0.837782 |
| 69 | 9 | 0 | 1.492984  | -0.008893 | 2.296728  |
| 70 | 5 | 0 | 1.430511  | -0.005976 | 0.837529  |

Table S22 Optimized cartesian coordinates of 4<sup>Mes</sup>.

| Center<br>Number | Atomic<br>Number | Atomic<br>Type | Coordinates (Angstroms) |           |           |
|------------------|------------------|----------------|-------------------------|-----------|-----------|
|                  |                  |                | X                       | Y         | Z         |
| 1                | 6                | 0              | -1.351723               | -0.702712 | -1.052475 |
| 2                | 6                | 0              | 0.037083                | -0.699381 | -1.048456 |
| 3                | 5                | 0              | 0.892499                | 0.003901  | 0.005920  |
| 4                | 6                | 0              | 0.034717                | 0.705768  | 1.059325  |
| 5                | 6                | 0              | -1.354097               | 0.706712  | 1.061784  |
| 6                | 6                | 0              | -1.907562               | -1.430316 | -2.143680 |
| 7                | 6                | 0              | -0.944891               | -1.972288 | -2.957567 |
| 8                | 16               | 0              | 0.653575                | -1.606291 | -2.409543 |
| 9                | 16               | 0              | 0.648123                | 1.613889  | 2.420991  |
| 10               | 6                | 0              | -0.951583               | 1.977187  | 2.967184  |
| 11               | 6                | 0              | -1.912414               | 1.433457  | 2.152298  |
| 12               | 6                | 0              | 2.458113                | 0.005085  | 0.006540  |
| 13               | 6                | 0              | 3.171886                | -1.004013 | 0.683354  |
| 14               | 6                | 0              | 4.568523                | -0.987440 | 0.678385  |
| 15               | 6                | 0              | 5.285426                | 0.010088  | 0.012110  |
| 16               | 6                | 0              | 4.567664                | 1.008098  | -0.652237 |
| 17               | 6                | 0              | 3.170886                | 1.018185  | -0.665055 |
| 18               | 1                | 0              | -2.972502               | -1.546878 | -2.317783 |
| 19               | 1                | 0              | -1.097534               | -2.566531 | -3.849017 |
| 20               | 1                | 0              | -1.106232               | 2.571285  | 3.858385  |
| 21               | 1                | 0              | -2.977747               | 1.548197  | 2.325203  |
| 22               | 1                | 0              | 5.109999                | -1.769702 | 1.207262  |
| 23               | 1                | 0              | 5.108417                | 1.797370  | -1.171314 |
| 24               | 6                | 0              | -2.159496               | 0.001221  | 0.004267  |
| 25               | 1                | 0              | -2.832244               | 0.725731  | -0.479461 |
| 26               | 1                | 0              | -2.831224               | -0.724646 | 0.487386  |
| 27               | 6                | 0              | 2.423340                | -2.095428 | 1.414491  |
| 28               | 1                | 0              | 1.775481                | -2.659620 | 0.731902  |
| 29               | 1                | 0              | 3.109920                | -2.804019 | 1.888027  |
| 30               | 1                | 0              | 1.776450                | -1.679433 | 2.197085  |
| 31               | 6                | 0              | 2.421451                | 2.112205  | -1.391380 |
| 32               | 1                | 0              | 1.774171                | 1.698546  | -2.174896 |
| 33               | 1                | 0              | 1.773867                | 2.673944  | -0.706517 |
| 34               | 1                | 0              | 3.107460                | 2.822519  | -1.863156 |
| 35               | 6                | 0              | 6.794638                | -0.005593 | -0.011884 |
| 36               | 1                | 0              | 7.204815                | -0.456520 | 0.898091  |
| 37               | 1                | 0              | 7.173150                | -0.588519 | -0.862305 |
| 38               | 1                | 0              | 7.203988                | 1.006026  | -0.104270 |

**Table S23** Optimized cartesian coordinates of  $4^{\text{Mes}}\text{F}^-$ .

| Center Number | Atomic Number | Atomic Type | Coordinates (Angstroms) |           |           |
|---------------|---------------|-------------|-------------------------|-----------|-----------|
|               |               |             | X                       | Y         | Z         |
| 1             | 6             | 0           | -1.447231               | -0.637753 | -1.063399 |
| 2             | 6             | 0           | -0.096225               | -0.774177 | -0.842115 |
| 3             | 6             | 0           | -0.274294               | 0.829587  | 1.140309  |
| 4             | 6             | 0           | -1.624339               | 0.956011  | 0.906687  |
| 5             | 6             | 0           | -1.950260               | -1.464008 | -2.124644 |
| 6             | 6             | 0           | -0.981820               | -2.229280 | -2.712248 |
| 7             | 16            | 0           | 0.564002                | -1.945304 | -1.963332 |
| 8             | 16            | 0           | 0.156039                | 1.728645  | 2.579384  |
| 9             | 6             | 0           | -1.480058               | 2.263429  | 2.840064  |
| 10            | 6             | 0           | -2.309010               | 1.769681  | 1.871613  |
| 11            | 6             | 0           | 1.799811                | -0.934730 | 1.108141  |
| 12            | 6             | 0           | 1.250417                | -1.988384 | 1.889059  |
| 13            | 6             | 0           | 2.066990                | -2.833185 | 2.648227  |
| 14            | 6             | 0           | 3.453032                | -2.687845 | 2.676794  |
| 15            | 6             | 0           | 3.999958                | -1.654393 | 1.921319  |
| 16            | 6             | 0           | 3.210345                | -0.788950 | 1.149372  |
| 17            | 1             | 0           | -2.995265               | -1.483512 | -2.426624 |
| 18            | 1             | 0           | -1.090976               | -2.934826 | -3.526276 |
| 19            | 1             | 0           | -1.737576               | 2.895991  | 3.680246  |
| 20            | 1             | 0           | -3.378130               | 1.968469  | 1.838995  |
| 21            | 1             | 0           | 1.603694                | -3.626740 | 3.235430  |
| 22            | 1             | 0           | 5.080852                | -1.510285 | 1.930460  |
| 23            | 6             | 0           | -0.239851               | -2.250013 | 1.945933  |
| 24            | 1             | 0           | -0.789770               | -1.371090 | 2.295781  |
| 25            | 1             | 0           | -0.644284               | -2.490432 | 0.957839  |
| 26            | 1             | 0           | -0.457993               | -3.086465 | 2.621179  |
| 27            | 6             | 0           | 4.325117                | -3.628947 | 3.473615  |
| 28            | 1             | 0           | 3.851346                | -3.911929 | 4.422115  |
| 29            | 1             | 0           | 4.527671                | -4.562142 | 2.927511  |
| 30            | 1             | 0           | 5.295646                | -3.174150 | 3.705546  |
| 31            | 6             | 0           | 3.958309                | 0.290405  | 0.386604  |
| 32            | 1             | 0           | 3.794431                | 0.214650  | -0.691080 |
| 33            | 1             | 0           | 3.626401                | 1.292491  | 0.669002  |
| 34            | 1             | 0           | 5.035236                | 0.209532  | 0.583968  |
| 35            | 9             | 0           | 1.583870                | 1.026442  | -0.503052 |
| 36            | 5             | 0           | 0.817277                | 0.046453  | 0.223848  |
| 37            | 6             | 0           | -2.326627               | 0.278044  | -0.245653 |
| 38            | 1             | 0           | -2.772729               | 1.042675  | -0.904317 |
| 39            | 1             | 0           | -3.186099               | -0.295258 | 0.140887  |

**Table S24** Optimized cartesian coordinates of tris(pentafluorophenyl)borane.

| Center Number | Atomic Number | Atomic Type | Coordinates (Angstroms) |           |           |
|---------------|---------------|-------------|-------------------------|-----------|-----------|
|               |               |             | X                       | Y         | Z         |
| 1             | 5             | 0           | 0.000026                | 0.000024  | -0.000306 |
| 2             | 6             | 0           | 1.521533                | 0.354049  | -0.000124 |
| 3             | 6             | 0           | 2.467392                | -0.412147 | -0.696200 |
| 4             | 6             | 0           | 2.031788                | 1.459085  | 0.696152  |
| 5             | 6             | 0           | 3.822595                | -0.107602 | -0.715050 |
| 6             | 6             | 0           | 3.382198                | 1.784135  | 0.715388  |
| 7             | 6             | 0           | 4.281471                | 0.996261  | 0.000290  |



|    |   |   |           |           |           |
|----|---|---|-----------|-----------|-----------|
| 8  | 6 | 0 | -0.454012 | -1.494681 | -0.000270 |
| 9  | 6 | 0 | -1.590190 | -1.930762 | -0.696811 |
| 10 | 6 | 0 | 0.247603  | -2.489070 | 0.696246  |
| 11 | 6 | 0 | -2.004165 | -3.256628 | -0.715672 |
| 12 | 6 | 0 | -0.146242 | -3.821057 | 0.715502  |
| 13 | 6 | 0 | -1.277993 | -4.205916 | 0.000084  |
| 14 | 6 | 0 | -1.067409 | 1.140596  | -0.000173 |
| 15 | 6 | 0 | -2.280040 | 1.029496  | 0.695155  |
| 16 | 6 | 0 | -0.876387 | 2.343312  | -0.695342 |
| 17 | 6 | 0 | -3.236727 | 2.036487  | 0.714484  |
| 18 | 6 | 0 | -1.817709 | 3.364693  | -0.714116 |
| 19 | 6 | 0 | -3.003575 | 3.209718  | 0.000366  |
| 20 | 9 | 0 | -3.913188 | 4.181923  | 0.000727  |
| 21 | 9 | 0 | -4.371190 | 1.891972  | 1.405897  |
| 22 | 9 | 0 | -2.551827 | -0.074788 | 1.409009  |
| 23 | 9 | 0 | 1.211481  | 2.245882  | 1.410965  |
| 24 | 9 | 0 | 3.824442  | 2.838302  | 1.407561  |
| 25 | 9 | 0 | 5.578212  | 1.297971  | 0.000531  |
| 26 | 9 | 0 | 4.685023  | -0.858085 | -1.407109 |
| 27 | 9 | 0 | 2.078817  | -1.480114 | -1.411300 |
| 28 | 9 | 0 | 1.338930  | -2.172058 | 1.411378  |
| 29 | 9 | 0 | 0.545212  | -4.731125 | 1.408043  |
| 30 | 9 | 0 | -1.665208 | -5.479741 | 0.000343  |
| 31 | 9 | 0 | -3.085096 | -3.628220 | -1.408105 |
| 32 | 9 | 0 | -2.320518 | -1.060292 | -1.412209 |
| 33 | 9 | 0 | 0.243297  | 2.541433  | -1.409443 |
| 34 | 9 | 0 | -1.598455 | 4.487284  | -1.405242 |

**Table S25** Optimized cartesian coordinates of tris(pentafluorophenyl)borane •F<sup>-</sup>.

| Center Number | Atomic Number | Atomic Type | Coordinates (Angstroms) |           |           |
|---------------|---------------|-------------|-------------------------|-----------|-----------|
|               |               |             | X                       | Y         | Z         |
| 1             | 6             | 0           | 3.188061                | 1.000285  | 1.563497  |
| 2             | 6             | 0           | 2.331666                | 1.499851  | 2.539814  |
| 3             | 6             | 0           | 4.541533                | 1.255713  | 1.789190  |
| 4             | 6             | 0           | 2.765506                | 2.225589  | 3.648804  |
| 5             | 6             | 0           | 5.020948                | 1.972921  | 2.880888  |
| 6             | 6             | 0           | 4.121738                | 2.467454  | 3.819081  |
| 7             | 6             | 0           | 1.140957                | 0.346149  | -0.113766 |
| 8             | 6             | 0           | 0.165848                | -0.638515 | 0.012100  |
| 9             | 6             | 0           | 0.669743                | 1.578398  | -0.569311 |
| 10            | 6             | 0           | -1.175827               | -0.441969 | -0.313395 |
| 11            | 6             | 0           | -0.658647               | 1.821573  | -0.904519 |
| 12            | 6             | 0           | -1.591193               | 0.797888  | -0.779416 |
| 13            | 6             | 0           | 3.183845                | -1.411228 | 0.292860  |
| 14            | 6             | 0           | 3.212716                | -2.168170 | -0.879421 |
| 15            | 6             | 0           | 3.550391                | -2.105188 | 1.441858  |
| 16            | 6             | 0           | 3.599702                | -3.503837 | -0.927337 |
| 17            | 6             | 0           | 3.947255                | -3.442065 | 1.442426  |
| 18            | 6             | 0           | 3.975859                | -4.146666 | 0.246765  |
| 19            | 5             | 0           | 2.752157                | 0.178746  | 0.200467  |
| 20            | 9             | 0           | 0.995933                | 1.293073  | 2.472829  |
| 21            | 9             | 0           | 5.474196                | 0.767763  | 0.946148  |
| 22            | 9             | 0           | 2.817152                | -1.624531 | -2.048467 |
| 23            | 9             | 0           | 3.529716                | -1.509440 | 2.656812  |
| 24            | 9             | 0           | 1.507645                | 2.630099  | -0.671451 |
| 25            | 9             | 0           | 0.470852                | -1.870678 | 0.481436  |

|    |   |   |           |           |           |
|----|---|---|-----------|-----------|-----------|
| 26 | 9 | 0 | 3.461058  | 0.750757  | -0.887128 |
| 27 | 9 | 0 | 6.341322  | 2.187002  | 3.048238  |
| 28 | 9 | 0 | 1.885860  | 2.692330  | 4.557437  |
| 29 | 9 | 0 | 4.300575  | -4.058374 | 2.588087  |
| 30 | 9 | 0 | 3.606408  | -4.185885 | -2.090078 |
| 31 | 9 | 0 | -2.073544 | -1.438594 | -0.179119 |
| 32 | 9 | 0 | -1.056786 | 3.034231  | -1.338314 |
| 33 | 9 | 0 | 4.562234  | 3.165974  | 4.882483  |
| 34 | 9 | 0 | -2.881711 | 1.009409  | -1.099741 |
| 35 | 9 | 0 | 4.356177  | -5.438037 | 0.224276  |

**Table S26** Optimized cartesian coordinates of Me<sub>3</sub>SiF.

| Center<br>Number | Atomic<br>Number | Atomic<br>Type | Coordinates (Angstroms) |           |           |
|------------------|------------------|----------------|-------------------------|-----------|-----------|
|                  |                  |                | X                       | Y         | Z         |
| 1                | 14               | 0              | 1.768259                | 0.077450  | 0.042705  |
| 2                | 6                | 0              | -0.106130               | 0.105685  | -0.006114 |
| 3                | 1                | 0              | -0.524817               | -0.401062 | 0.872100  |
| 4                | 1                | 0              | -0.489870               | 1.132143  | -0.012777 |
| 5                | 1                | 0              | -0.489958               | -0.402134 | -0.898149 |
| 6                | 6                | 0              | 2.419674                | -1.680342 | -0.006438 |
| 7                | 1                | 0              | 2.069246                | -2.211170 | -0.898819 |
| 8                | 1                | 0              | 3.515348                | -1.700006 | -0.012605 |
| 9                | 1                | 0              | 2.081048                | -2.244308 | 0.871412  |
| 10               | 6                | 0              | 2.419689                | 0.998420  | 1.540731  |
| 11               | 1                | 0              | 3.515358                | 1.013960  | 1.554453  |
| 12               | 1                | 0              | 2.068920                | 2.036537  | 1.554819  |
| 13               | 1                | 0              | 2.081426                | 0.519618  | 2.467922  |
| 14               | 9                | 0              | 2.311767                | 0.846262  | -1.288444 |

**Table S27** Optimized cartesian coordinates of Me<sub>3</sub>Si<sup>+</sup>.

| Center<br>Number | Atomic<br>Number | Atomic<br>Type | Coordinates (Angstroms) |           |           |
|------------------|------------------|----------------|-------------------------|-----------|-----------|
|                  |                  |                | X                       | Y         | Z         |
| 1                | 14               | 0              | 0.371308                | 0.483907  | 0.061909  |
| 2                | 6                | 0              | -0.529691               | 2.089268  | 0.033729  |
| 3                | 1                | 0              | 0.139316                | 2.952276  | 0.087469  |
| 4                | 1                | 0              | -1.135719               | 2.160993  | -0.881160 |
| 5                | 1                | 0              | -1.240565               | 2.133148  | 0.871669  |
| 6                | 6                | 0              | 2.209045                | 0.461662  | 0.171251  |
| 7                | 1                | 0              | 2.535375                | 0.990749  | 1.078430  |
| 8                | 1                | 0              | 2.621494                | -0.550783 | 0.180497  |
| 9                | 1                | 0              | 2.639772                | 1.017176  | -0.674517 |
| 10               | 6                | 0              | -0.564949               | -1.099267 | -0.019437 |
| 11               | 1                | 0              | -0.231276               | -1.685782 | -0.887799 |
| 12               | 1                | 0              | -0.338443               | -1.712380 | 0.864997  |
| 13               | 1                | 0              | -1.646156               | -0.950360 | -0.083145 |
